# Supplementary material for: 1,2,6-Thiadiazinones as Novel Narrow Spectrum Calcium/Calmodulin-Dependent Protein Kinase Kinase 2 (CaMKK2) Inhibitors
Source: MDPI journal article supplement (doi:10.3390/molecules23051221), 2018-05-19
Supplement: s1 [file s1]

## Supporting Information

### 1,2,6-Thiadiazinones as novel narrow spectrum Calcium/calmodulin-dependent protein kinase kinase 2 (CaMKK2) inhibitors

**Christopher R. M. Asquith**<sup>1,2,\*</sup>, **Paulo H. Godoi**<sup>3</sup>, **Rafael M. Couñago**<sup>3</sup>, **Tuomo Laitinen**<sup>4</sup>, **John W. Scott**<sup>5,6,7</sup>, **Christopher G. Langendorf**<sup>5</sup>, **Jonathan S. Oakhill**<sup>5,6</sup>, **David H. Drewry**<sup>1</sup>, **William J. Zuercher**<sup>1,8</sup>, **Panayiotis A. Koutentis**<sup>9</sup>, **Timothy M. Willson**<sup>1</sup>, **Andreas S. Kalogirou**<sup>9,10,\*</sup>

- <sup>1</sup> Structural Genomics Consortium, UNC Eshelman School of Pharmacy, University of North Carolina at Chapel Hill, Chapel Hill, NC 27599, USA. [chris.asquith@unc.edu](mailto:chris.asquith@unc.edu) (C.R.M.A.), [david.drewry@unc.edu](mailto:david.drewry@unc.edu) (D.H.D.), [william.zuercher@unc.edu](mailto:william.zuercher@unc.edu) (W.J.Z.), [tim.willson@unc.edu](mailto:tim.willson@unc.edu) (T.M.W.)
- <sup>2</sup> Department of Pharmacology, University of North Carolina at Chapel Hill, NC 27599, USA [chris.asquith@unc.edu](mailto:chris.asquith@unc.edu) (C.R.M.A.)
- <sup>3</sup> Structural Genomics Consortium, Universidade Estadual de Campinas - UNICAMP, Campinas, São Paulo, 13083-886, Brazil. [phgodoi@yahoo.com](mailto:phgodoi@yahoo.com) (P.H.G.), [rafaelcounago@gmail.com](mailto:rafaelcounago@gmail.com) (R.M.C.)
- <sup>4</sup> School of Pharmacy, Faculty of Health Sciences, University of Eastern Finland, 70211, Kuopio, Finland. [tuomo.laitinen@uef.fi](mailto:tuomo.laitinen@uef.fi) (T.L.)
- <sup>5</sup> St Vincent's Institute and Department of Medicine, University of Melbourne, 41 Victoria Parade, Fitzroy, 3065, Australia. [jscott@svi.edu.au](mailto:jscott@svi.edu.au) (J.S.), [clangendorf@svi.edu.au](mailto:clangendorf@svi.edu.au) (C.G.L.), [joakhill@svi.edu.au](mailto:joakhill@svi.edu.au) (J.S.O.)
- <sup>6</sup> Mary MacKillop Institute for Health Research, Australian Catholic University, 215 Spring Street, Melbourne, 3000, Australia. (J.S.), (J.S.O.)
- <sup>7</sup> The Florey Institute of Neuroscience and Mental Health, Parkville, 3052, Australia. (J.S.)
- <sup>8</sup> Lineberger Comprehensive Cancer Center, University of North Carolina at Chapel Hill, Chapel Hill, NC 27599, USA. (W.J.Z.)
- <sup>9</sup> Department of Chemistry, University of Cyprus, P. O. Box 20537, 1678 Nicosia, Cyprus. [koutenti@ucy.ac.cy](mailto:koutenti@ucy.ac.cy) (P.A.K.), [kalogirou.andreas@ucy.ac.cy](mailto:kalogirou.andreas@ucy.ac.cy) (A.S.K.)
- <sup>10</sup> Department of Life Sciences, School of Sciences, European University Cyprus, 6 Diogenis Str., Engomi, P. O. Box 22006, 1516 Nicosia, Cyprus. [A.Kalogirou@external.euc.ac.cy](mailto:A.Kalogirou@external.euc.ac.cy) (A.S.K.)

| <b>Contents</b>                                                            | <b>Page</b> |
|----------------------------------------------------------------------------|-------------|
| S1. Design of TDZs <b>1-5</b>                                              | S3          |
| S2. DSF Panel data                                                         | S4-5        |
| S3. X-ray crystallography data                                             | S6          |
| S4. Validation of modelling docking poses                                  | S7          |
| S5. CaMKK2 FRET results for TDZs <b>1-5</b> and <b>10-19</b>               | S8          |
| S6. CaMKK2 Enzyme assay raw data results for TDZs <b>10-12</b> and STO-609 | S9          |
| S7. References                                                             | S9          |
| S8. <sup>1</sup> H and <sup>13</sup> C NMR spectra of all new compounds    | S10-S50     |

## S1. Design of TDZs 1-5

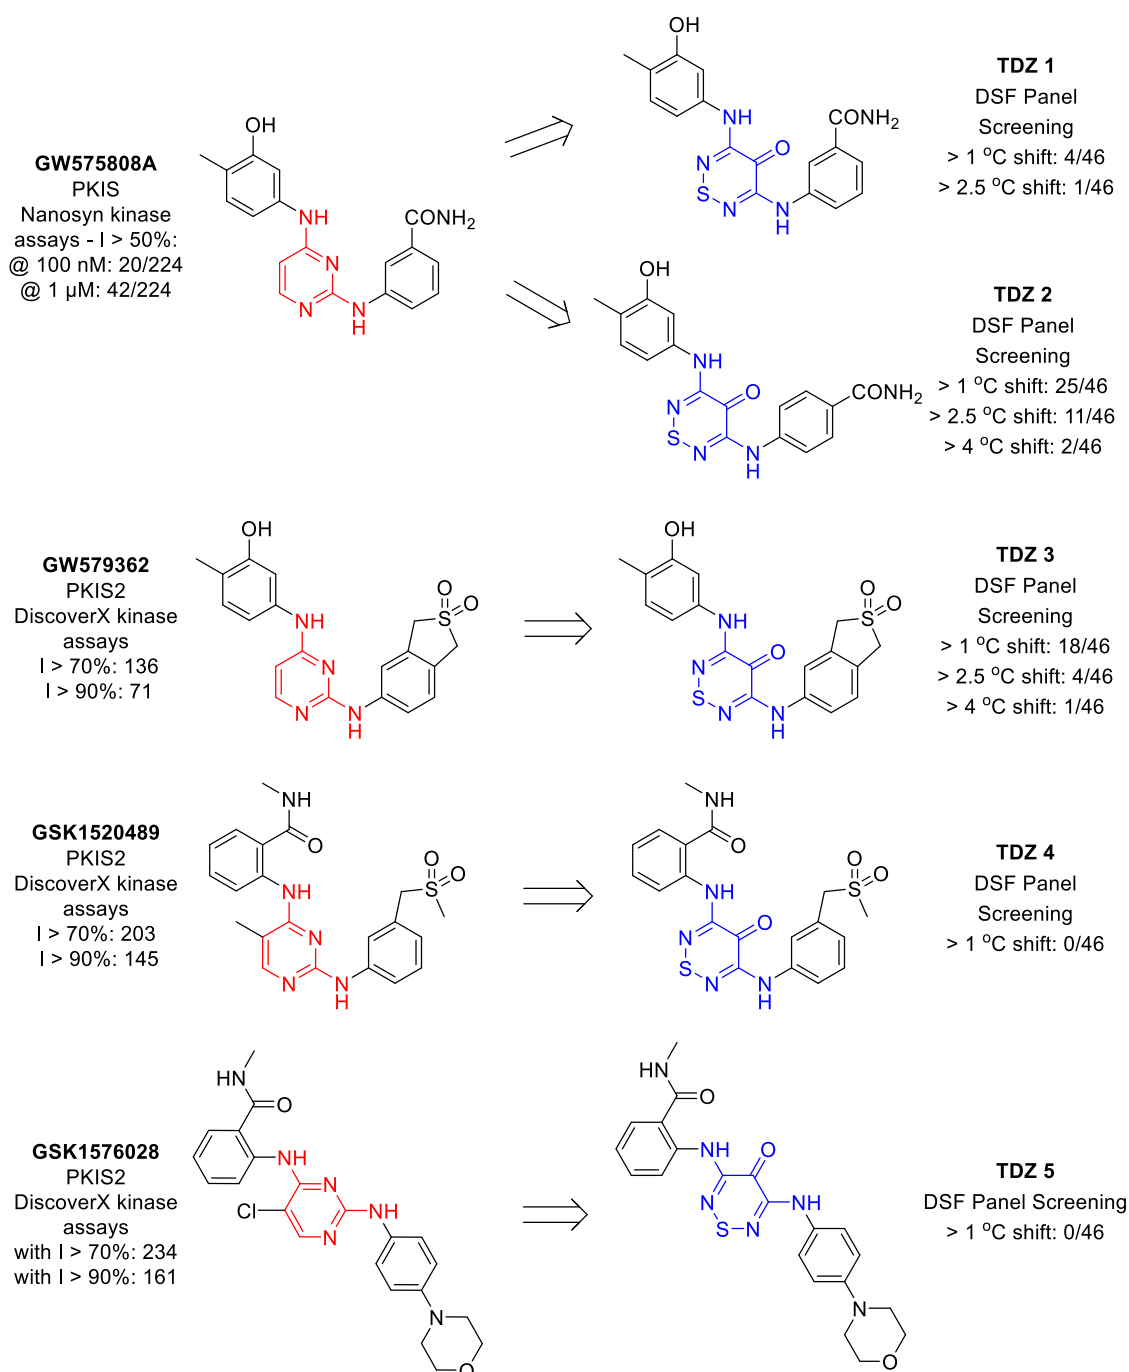

**Figure S1.** Initial set designed using the template strategy to utilizing the thiadiazinone core modification (blue) over existing 2,4-dianilinopyrimidine (red) kinase inhibitors from PKIS and PKIS2. These compounds were then profiled by DSF on a representative set of 46 kinases.

**S2. DSF Panel data****Table S1.** DSF kinome selectivity panel.

| Number | Kinases  | Compounds, $\Delta T_m$ (°C) |      |      |      |      |
|--------|----------|------------------------------|------|------|------|------|
|        |          | 1                            | 2    | 3    | 4    | 5    |
| 1      | AAK1     | 0,6                          | 1,5  | 0,6  | -0,4 | -0,4 |
| 2      | BMP2K    | -0,4                         | -0,2 | 0,1  | -0,1 | -0,1 |
| 3      | BMXA     | 0,1                          | -0,1 | 0,0  | 0,0  | 0,0  |
| 4      | BRAFA    | -0,1                         | 0,2  | 0,7  | 0,1  | 0,4  |
| 5      | CAMK1D   | 0,8                          | 4,3  | 1,4  | -1,3 | -0,9 |
| 6      | CAMK1G   | 1,8                          | 3,3  | 3,0  | 0,2  | 0,1  |
| 7      | CAMKK1   | 0,0                          | 3,7  | 1,4  | -0,4 | -0,4 |
| 8      | CAMKK2B  | 0,5                          | 2,9  | 2,3  | -0,4 | -0,5 |
| 9      | CDC42BPA | 0,3                          | 4,8  | 2,3  | -0,8 | -0,6 |
| 10     | CDK2     | 0,2                          | 2,7  | 1,8  | 0,2  | -0,1 |
| 11     | CDKL1    | 1,2                          | 1,0  | 0,9  | 0,5  | 0,5  |
| 12     | CHEK2    | 0,6                          | 3,1  | 1,6  | 0,6  | 0,8  |
| 13     | CLK1     | 0,5                          | 0,9  | 2,1  | 0,0  | 1,0  |
| 14     | CSNK1G1  | -0,6                         | -1,0 | -0,7 | 0,3  | 0,0  |
| 15     | CSNK1G3  | 0,0                          | 0,1  | -0,2 | -0,1 | 0,0  |
| 16     | CSNK2A1  | -0,9                         | -0,2 | -0,6 | -0,4 | -0,4 |
| 17     | DYRK1AA  | -0,6                         | 0,9  | -0,1 | -0,5 | -0,8 |
| 18     | DYRK2A   | 0,1                          | 2,4  | 0,7  | 0,1  | 0,1  |
| 19     | EPHA2A   | 0,2                          | 0,5  | 0,8  | -0,1 | 0,0  |
| 20     | GAKA     | -0,3                         | 1,4  | 0,0  | -0,4 | -0,4 |
| 21     | GSG2A    | 0,6                          | 1,3  | 1,2  | 0,4  | 0,3  |
| 22     | MAPK1A   | -0,2                         | 1,4  | 0,1  | -0,3 | -0,3 |
| 23     | MAP2K7A  | 1,1                          | 3,1  | 3,2  | 0,6  | 1,0  |
| 24     | MAPK14B  | 0,0                          | 0,6  | 1,0  | -0,2 | -0,3 |
| 25     | MAPK3A   | 0,1                          | 1,2  | 0,4  | 0,1  | 0,1  |
| 26     | PHKG2A   | 0,7                          | 2,4  | 1,6  | 0,2  | 0,2  |
| 27     | PIM1A    | 1,0                          | 3,5  | 4,1  | -0,7 | -0,2 |
| 28     | PLK1A    | 0,3                          | -0,2 | 1,1  | 0,2  | 0,2  |
| 29     | PKMYT1A  | 0,0                          | 3,0  | 1,2  | -0,3 | -0,8 |
| 30     | PRPF4BA  | 0,7                          | 0,1  | 0,6  | 0,1  | 0,1  |
| 31     | RPS6KA1A | -0,6                         | 1,3  | -0,4 | -0,4 | -0,4 |
| 32     | RPS6KA5A | -0,9                         | 1,7  | -0,3 | -1,2 | -1,1 |
| 33     | RPS6KA6A | 0,5                          | 2,6  | 0,9  | -0,3 | -0,6 |
| 34     | SLKA     | -0,6                         | -0,1 | -0,2 | -0,8 | -0,7 |
| 35     | SRPK1A   | 0,0                          | 1,8  | 0,0  | 0,0  | 0,0  |
| 36     | SRPK2A   | -0,2                         | 0,6  | 0,1  | -0,3 | -0,1 |
| 37     | STK3     | 0,2                          | 2,1  | 1,1  | -0,4 | -0,3 |

|    |         |      |      |      |      |      |
|----|---------|------|------|------|------|------|
| 38 | STK6A   | -0,3 | 1,0  | 0,1  | -0,1 | 0,5  |
| 39 | STK10A  | 0,5  | 0,9  | 2,2  | 0,2  | -0,4 |
| 40 | STK17AA | -0,5 | 2,2  | 1,7  | -0,8 | -0,8 |
| 41 | STK24A  | -0,1 | -    | -0,3 | 0,0  | -1,1 |
| 42 | STK38LA | 0,2  | 0,4  | 0,8  | 0,4  | 0,3  |
| 43 | TRIB2A  | 2,5  | -    | 4,9  | 1,0  | 0,8  |
| 44 | TTKA    | 0,8  | 2,6  | 2,1  | 0,3  | 0,1  |
| 45 | VRK1    | -0,4 | -0,7 | -0,2 | -0,3 | -0,3 |
| 46 | VRK2A   | -0,6 | 1,8  | 0,1  | -0,3 | -0,3 |

### S3. X-ray crystallography data

**Table S2.** Data processing and structure refinement statistics of the crystal structure of compound **2** in complex with CAMKK2

| Ligand                                         | thiadiazinone benzamide ( <b>2</b> )                                 |
|------------------------------------------------|----------------------------------------------------------------------|
| Data collection                                |                                                                      |
| X-ray source                                   | DLS I03                                                              |
| Wavelength (Å)                                 | 0.9763                                                               |
| Space group                                    | P6 <sub>1</sub>                                                      |
| Cell dimensions                                |                                                                      |
| <i>a</i> , <i>b</i> , <i>c</i> (Å)             | 100.5, 100.5, 69.7                                                   |
| $\alpha$ , $\beta$ , $\gamma$ (°)              | 90.0, 90.0, 120.0                                                    |
| Resolution (Å)*                                | 19.61-1.60 (1.63-1.60)                                               |
| No. of unique reflections*                     | 31,197 (2,111)                                                       |
| Rmerge (%)*                                    | 12.4 (51.4)                                                          |
| Mean I/ $\sigma$ I *                           | 7.3 (2.4)                                                            |
| Mean CC(1/2)*                                  | 1.0 (0.8)                                                            |
| Completeness (%)*                              | 99.7 (99.7)                                                          |
| Redundancy*                                    | 5.1 (5.2)                                                            |
| Refinement                                     |                                                                      |
| Resolution (Å)                                 | 19.96-1.90 (1.94-1.90)                                               |
| Rcryst / Rfree (%)                             | 16.1 / 18.5                                                          |
| No. of atoms / Mean B-factor (Å <sup>2</sup> ) |                                                                      |
| Protein atoms                                  | 2,096 / 33.3                                                         |
| Solvent atoms                                  | 246 / 49.4                                                           |
| Ligand atoms                                   | 27 / 28.0                                                            |
| Rmsd bond lengths (Å)                          | 0.010                                                                |
| Rmsd bond angles (degrees)                     | 1.03                                                                 |
| Ramachandran statistics (%)                    |                                                                      |
| Favored                                        | 98.0                                                                 |
| Allowed                                        | 2.0                                                                  |
| Outlier                                        | 0                                                                    |
| PDB ID                                         | 5VT1                                                                 |
| Crystallization conditions                     | 24% PEG 8,000, 0.1M<br>magnesium acetate, 0.1M<br>CHC buffer, pH 7.0 |

#### S4. Validation of modelling docking poses

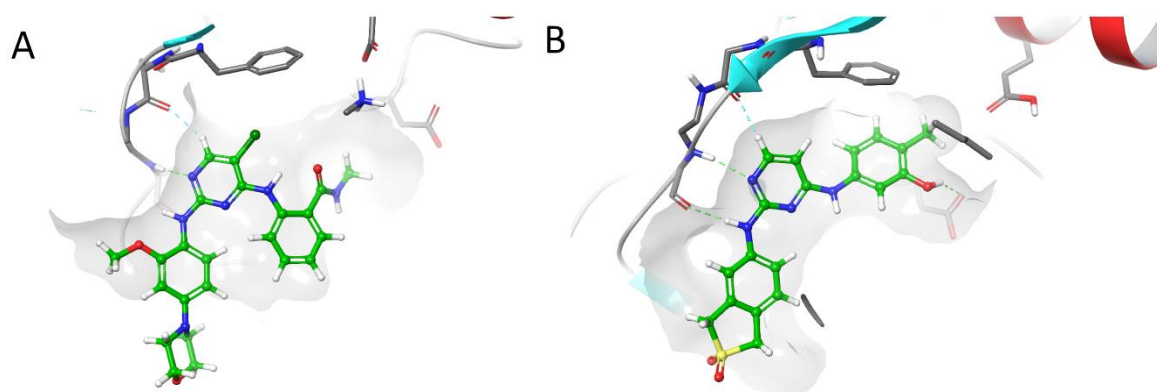

**Figure S2.** Validation of modelling docking poses showing the same hinge contacts as standard 2,4-dianilinopyrimidines: Pose of GW575808A (A) and GW579362 (B) docked into CaMKK2 (PDB 2Z2V) [1]

## S5. CaMKK2 FRET results for TDZs 1-5 and 10-19

**Figure S3.** FRET results for TDZs for 1-5 on CaMKK2

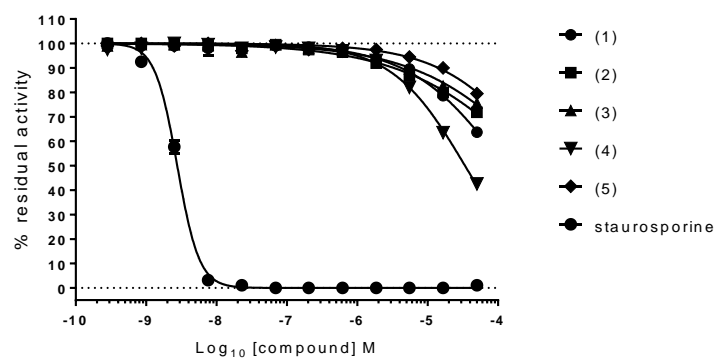

**Figure S4.** FRET results for TDZs for 10-19 on CaMKK2

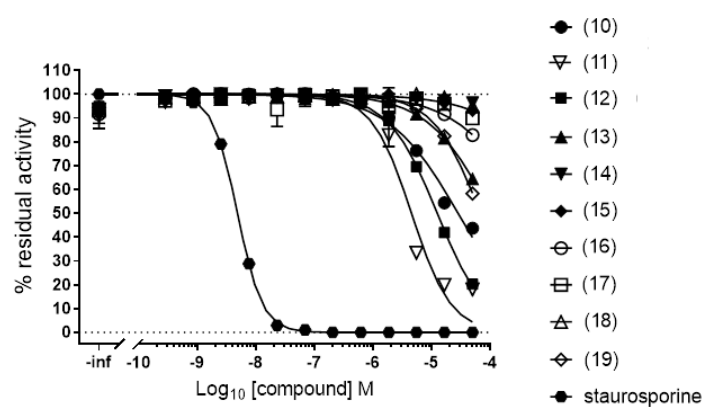



## S6. CaMKK2 Enzyme assay raw data results for TDZs 10-12 and STO-609

**Table S3.** Enzyme assay raw data for TDZs 10-12 and STO-609 including standard error measurements.

| [drug] ( $\mu$ M) | <b>10</b> | SEM  | <b>11</b> | SEM  | <b>12</b> | SEM  | <b>STO-609</b> | SEM  |
|-------------------|-----------|------|-----------|------|-----------|------|----------------|------|
| 100               | 2.19      | 0.09 | 1.23      | 0.09 | 0.83      | 0.04 | 0.07           | 0.00 |
| 10                | 52.53     | 1.68 | 42.11     | 2.46 | 28.43     | 1.13 | 1.89           | 0.09 |
| 1                 | 85.36     | 4.15 | 79.37     | 3.56 | 79.70     | 4.23 | 4.64           | 0.31 |
| 0.1               | 91.02     | 5.65 | 84.85     | 5.21 | 89.54     | 3.04 | 42.21          | 2.36 |
| 0.01              | 98.48     | 4.62 | 93.09     | 2.65 | 95.03     | 5.19 | 69.88          | 3.00 |
| 0.001             | 102.30    | 6.19 | 98.56     | 6.36 | 102.38    | 7.32 | 88.33          | 6.02 |
| 0                 | 100.00    | 5.82 | 100.00    | 4.71 | 100.00    | 4.30 | 100.00         | 6.19 |
| IC50 ( $\mu$ M)   | 11.87     | 2.82 | 6.51      | 2.53 | 4.09      | 0.88 | 0.04           | 0.02 |

## S7. References

1. Kukimoto-Niino, M.; Yoshikawa, S.; Takagi, T.; Ohsawa, N.; Tomabechei, Y.; Terada, T.; Shirouzu, M.; Suzuki, A.; Lee, S.; Yamauchi, T.; Okada-Iwabu, M.; Iwabu, M.; Kadowaki, T.; Minokoshi, Y.; Yokoyama, S. Crystal structure of the  $\text{Ca}^{2+}$ /calmodulin-dependent protein kinase kinase in complex with the inhibitor STO-609. *J. Biol. Chem.* **2011**, 286, 22570-22579. DOI: 10.1074/jbc.M111.251710.

**S8.  $^1\text{H}$  and  $^{13}\text{C}$  NMR spectra of all new compounds**

<sup>1</sup>H-NMR of 4-((oxazol-4-ylmethyl)amino)benzamide (**20**)

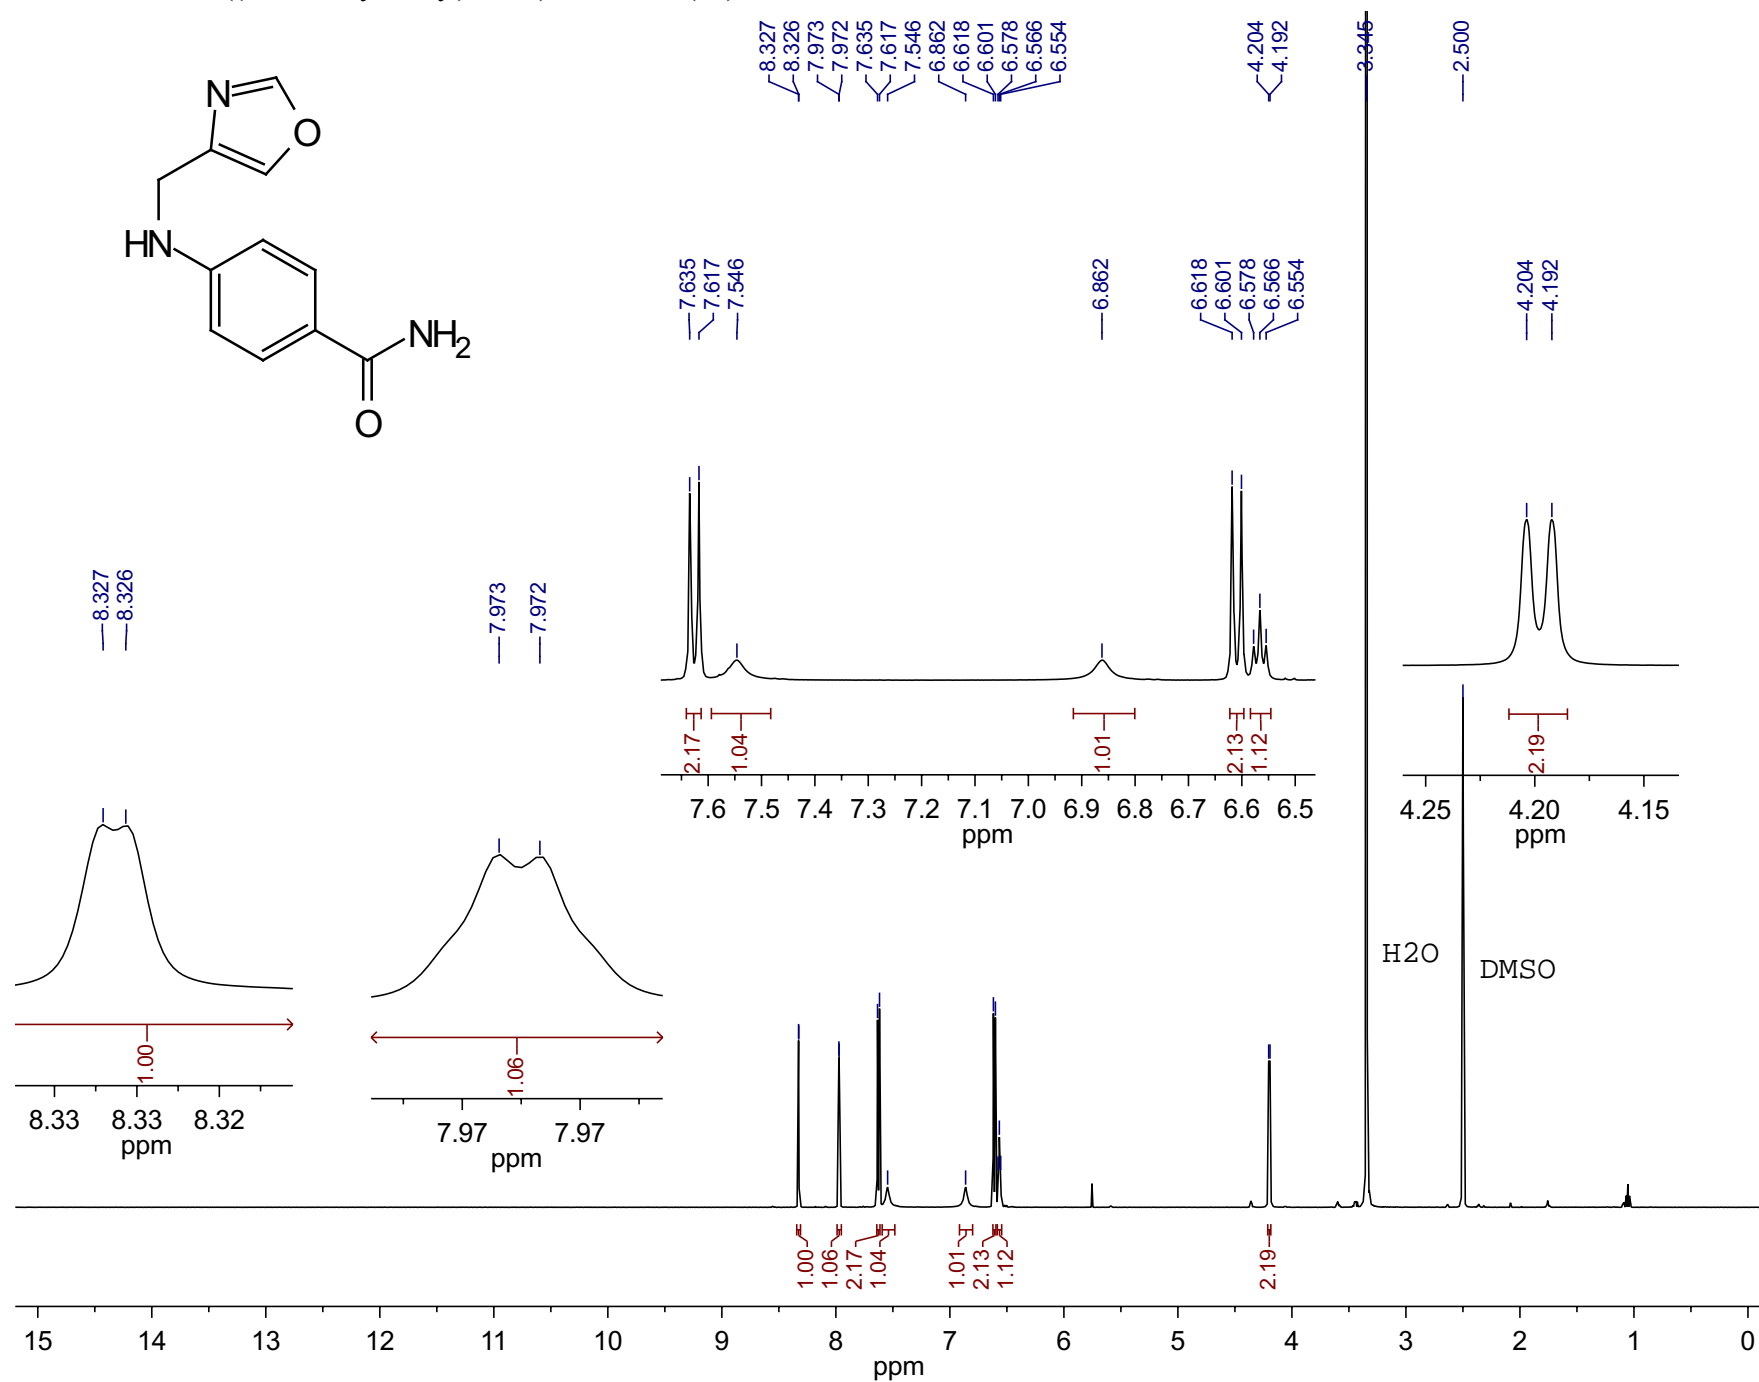

Current Data Parameters

NAME Kalogirou  
EXPNO 342  
PROCNO 1

F2 - Acquisition Parameters

Date\_ 20170627  
Time 19.21  
INSTRUM spect  
PROBHD 5 mm PABBO BB-  
PULPROG zg30  
TD 65536  
SOLVENT DMSO  
NS 16  
DS 2  
SWH 10000.000 Hz  
FIDRES 0.152588 Hz  
AQ 3.2767999 sec  
RG 114  
DW 50.000 usec  
DE 6.50 usec  
TE 296.8 K  
D1 1.00000000 sec  
TD0 1

CHANNEL f1

SFO1 500.0361158 MHz  
NUC1 <sup>1</sup>H  
P1 12.00 usec  
PLW1 14.50000000 W

F2 - Processing parameters

SI 65536  
SF 500.0330322 MHz  
WDW EM  
SSB 0  
LB 0.30 Hz  
GB 0  
PC 1.00

<sup>13</sup>C-NMR of 4-((oxazol-4-ylmethyl)amino)benzamide (**20**)

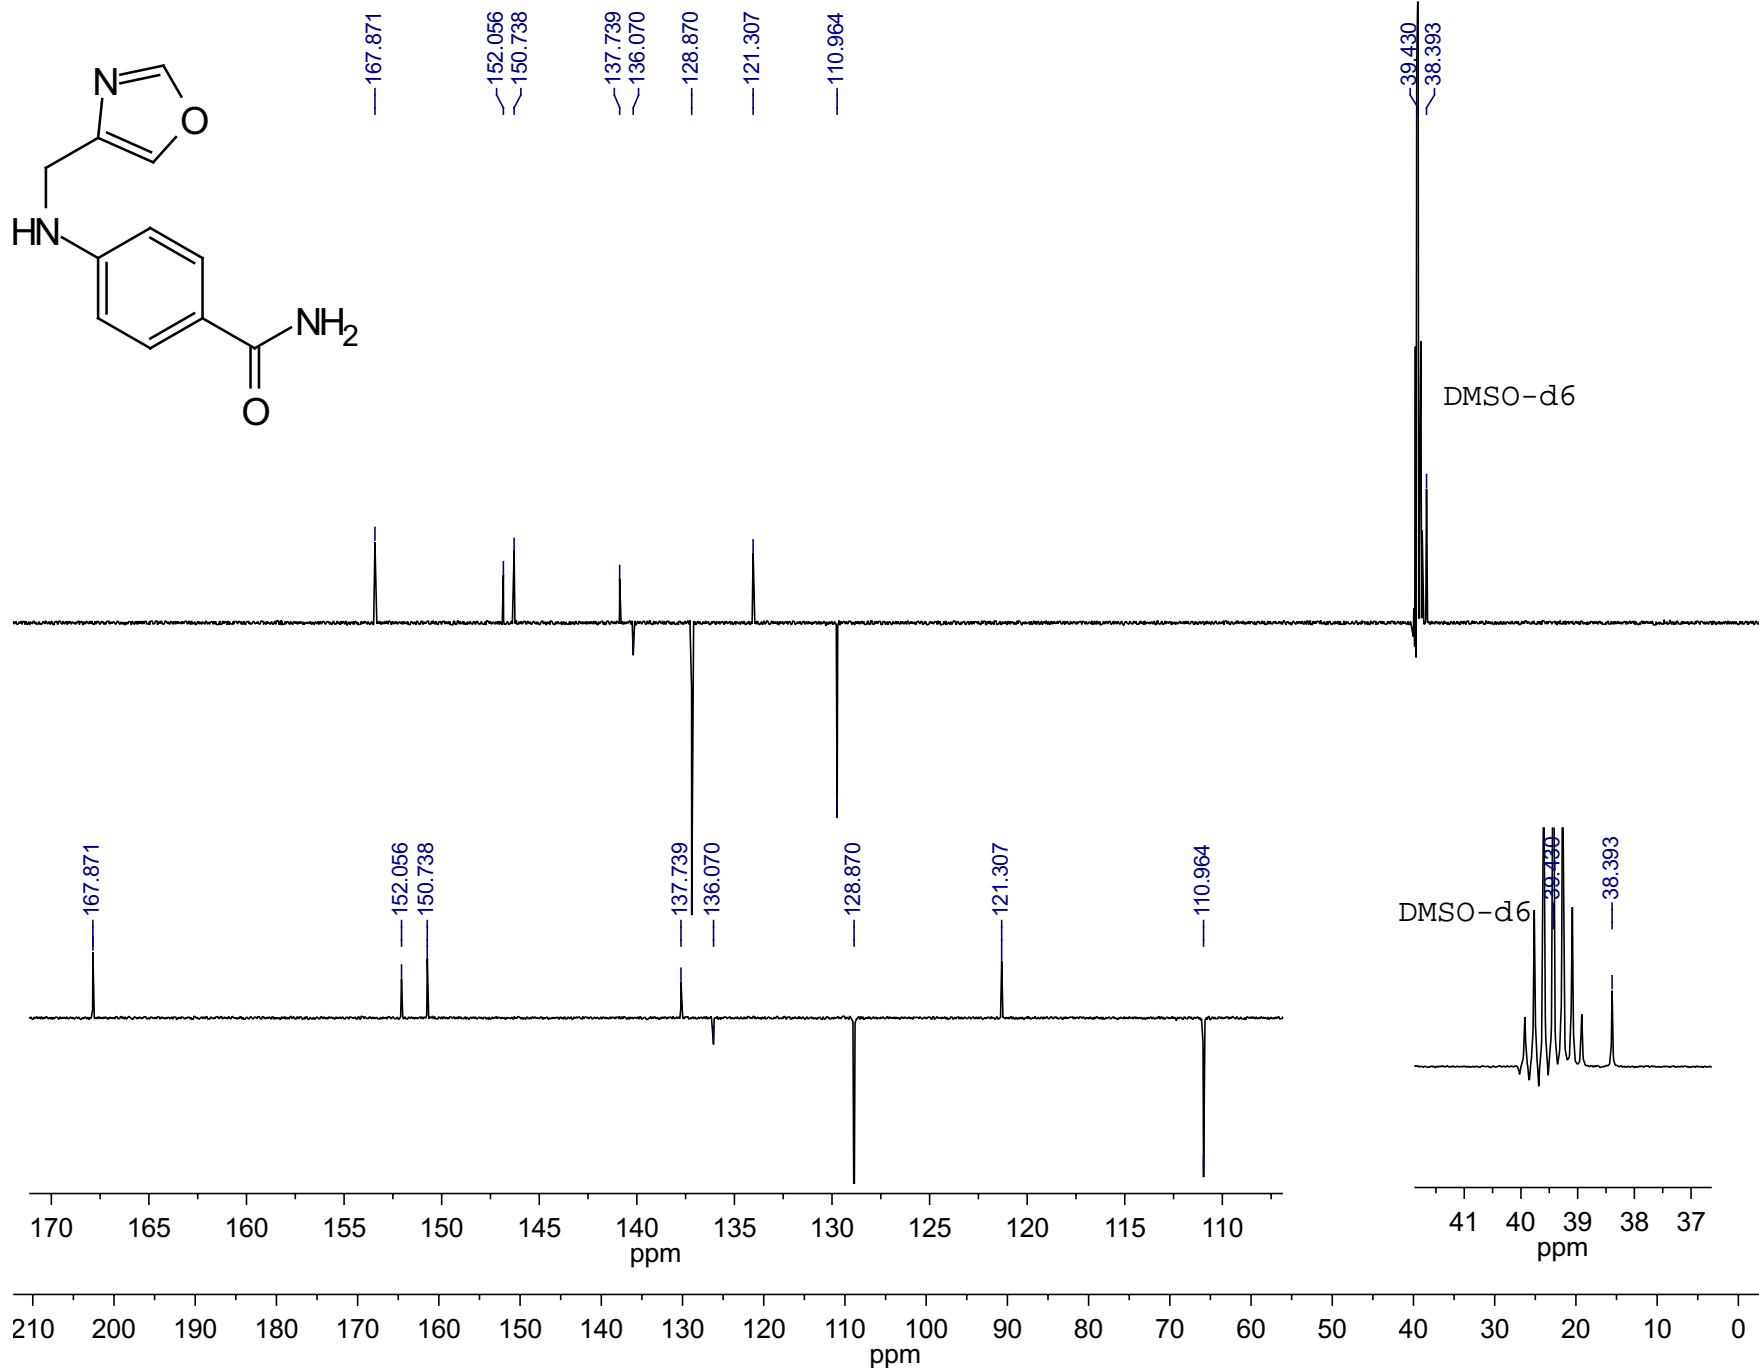

Current Data Parameters

|                             |                 |
|-----------------------------|-----------------|
| NAME                        | Kalogirou       |
| EXPNO                       | 343             |
| PROCNO                      | 1               |
| F2 - Acquisition Parameters |                 |
| Date_                       | 20170627        |
| Time                        | 19.32           |
| INSTRUM                     | spect           |
| PROBHD                      | 5 mm PABBO BB-  |
| PULPROG                     | jmod            |
| TD                          | 65536           |
| SOLVENT                     | DMSO            |
| NS                          | 5120            |
| DS                          | 4               |
| SWH                         | 29761.904 Hz    |
| FIDRES                      | 0.454131 Hz     |
| AQ                          | 1.1010048 sec   |
| RG                          | 2050            |
| DW                          | 16.800 usec     |
| DE                          | 6.50 usec       |
| TE                          | 297.7 K         |
| CNST2                       | 145.0000000     |
| CNST11                      | 1.0000000       |
| D1                          | 2.00000000 sec  |
| D20                         | 0.00689655 sec  |
| TD0                         | 1               |
| ===== CHANNEL f1 =====      |                 |
| SFO1                        | 125.7459782 MHz |
| NUC1                        | <sup>13</sup> C |
| P1                          | 9.00 usec       |
| P2                          | 18.00 usec      |
| PLW1                        | 140.00000000 W  |
| ===== CHANNEL f2 =====      |                 |
| SFO2                        | 500.0350280 MHz |
| NUC2                        | <sup>1</sup> H  |
| CPDPRG[2]                   | waltz16         |
| PCPD2                       | 80.00 usec      |
| PLW2                        | 14.50000000 W   |
| PLW12                       | 0.32624999 W    |
| F2 - Processing parameters  |                 |
| SI                          | 32768           |
| SF                          | 125.7334743 MHz |
| WDW                         | EM              |
| SSB                         | 0               |
| LB                          | 1.00 Hz         |
| GB                          | 0               |
| PC                          | 1.40            |

<sup>1</sup>H-NMR of 4-borono-2-cyclopentylbenzoic acid (**22**)

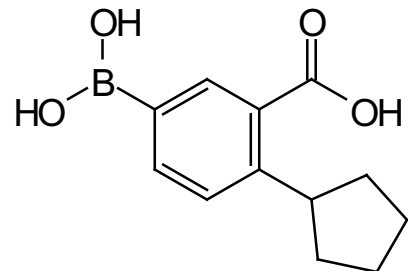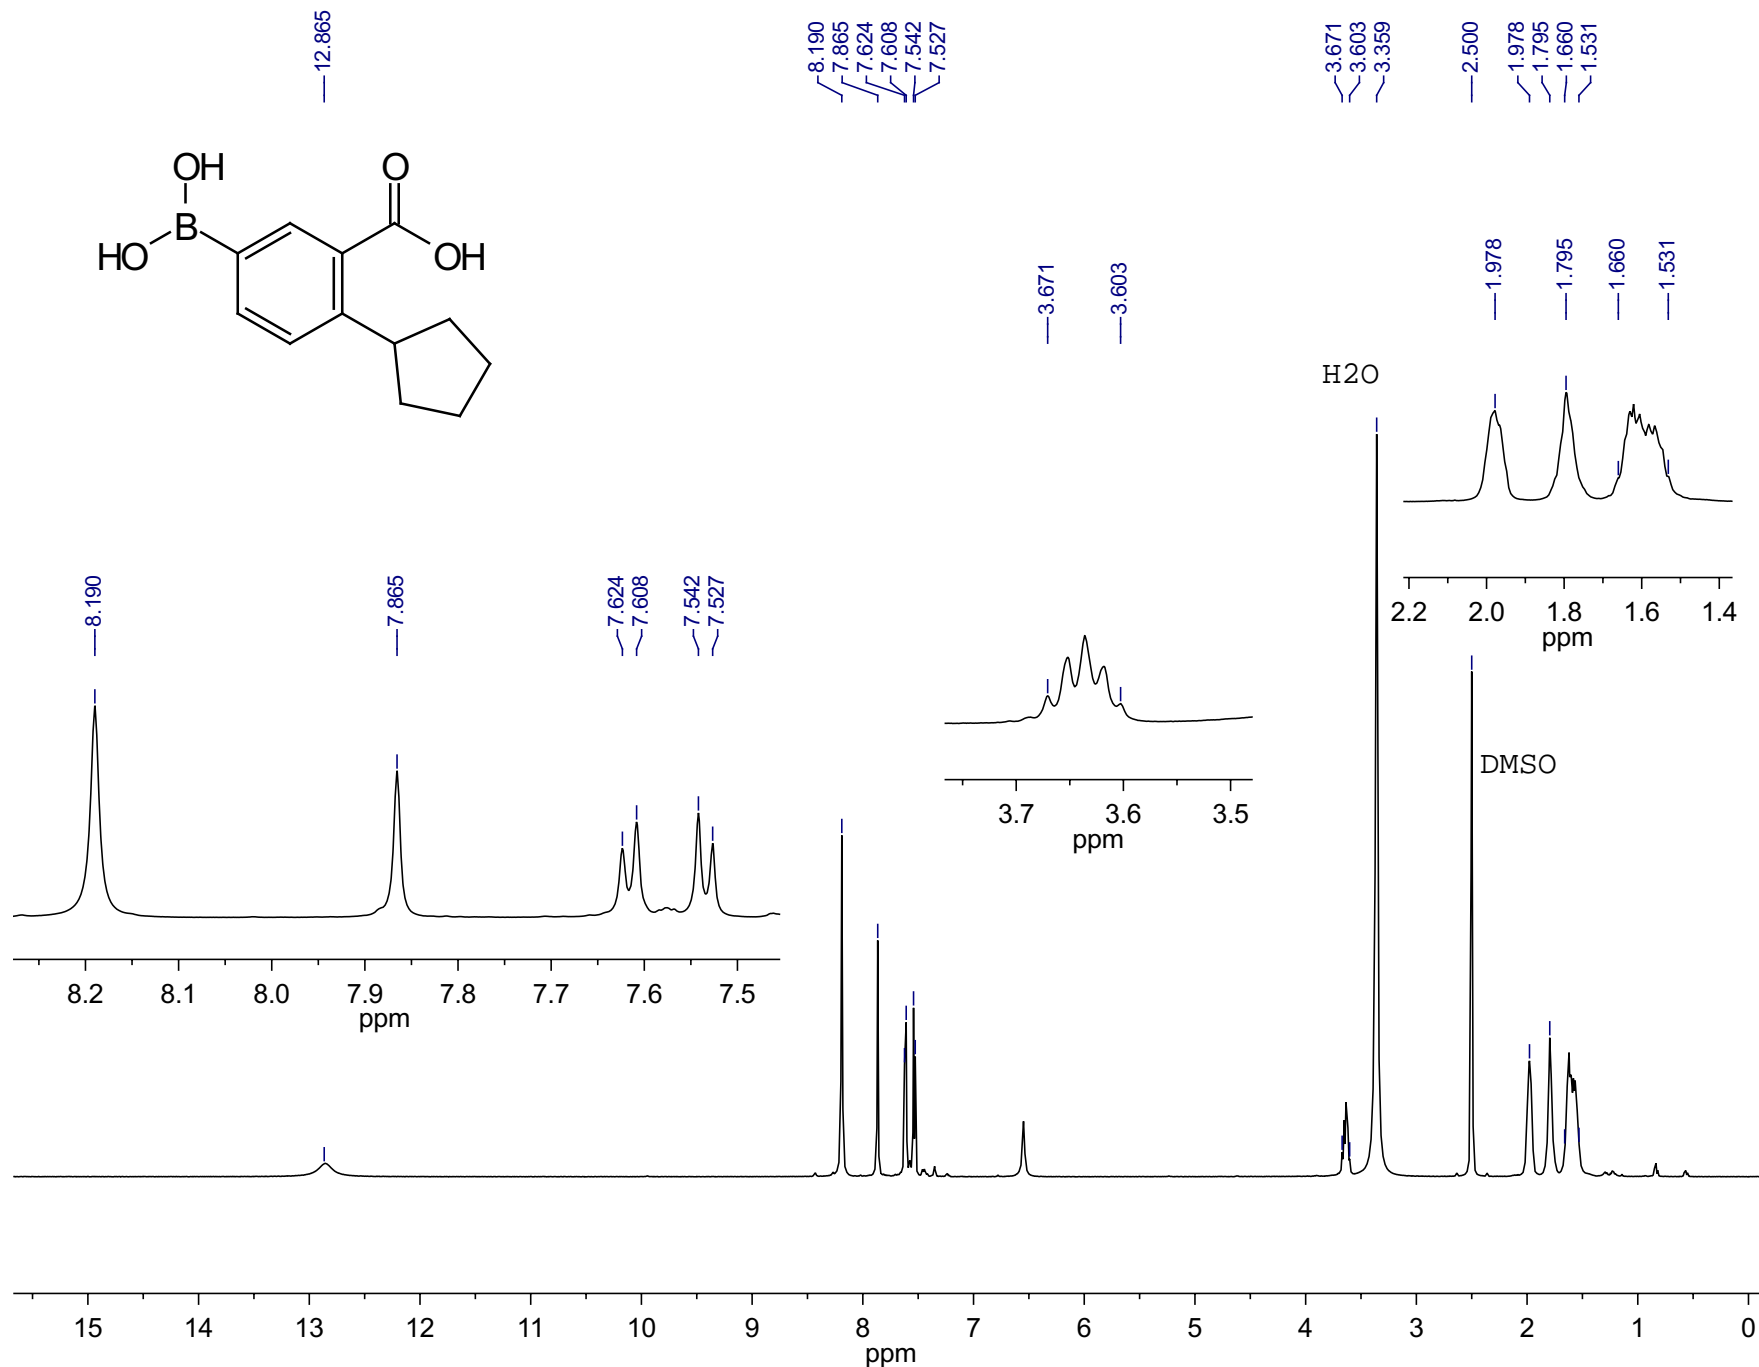

Current Data Parameters

NAME Kalogirou  
EXPNO 537  
PROCNO 1

F2 - Acquisition Parameters

Date\_ 20180414  
Time 18.04  
INSTRUM spect  
PROBHD 5 mm PABBO BB-  
PULPROG zg30  
TD 65536  
SOLVENT DMSO  
NS 16  
DS 2  
SWH 10000.000 Hz  
FIDRES 0.152588 Hz  
AQ 3.2767999 sec  
RG 101  
DW 50.000 usec  
DE 6.50 usec  
TE 295.0 K  
D1 1.00000000 sec  
TD0 1

===== CHANNEL f1 =====

SFO1 500.0361158 MHz  
NUC1 1H  
P1 12.00 usec  
PLW1 14.80000019 W

F2 - Processing parameters

SI 65536  
SF 500.0330316 MHz  
WDW EM  
SSB 0  
LB 0.30 Hz  
GB 0  
PC 1.00

<sup>13</sup>C-NMR of 4-borono-2-cyclopentylbenzoic acid (**22**)

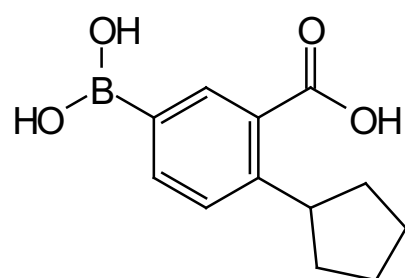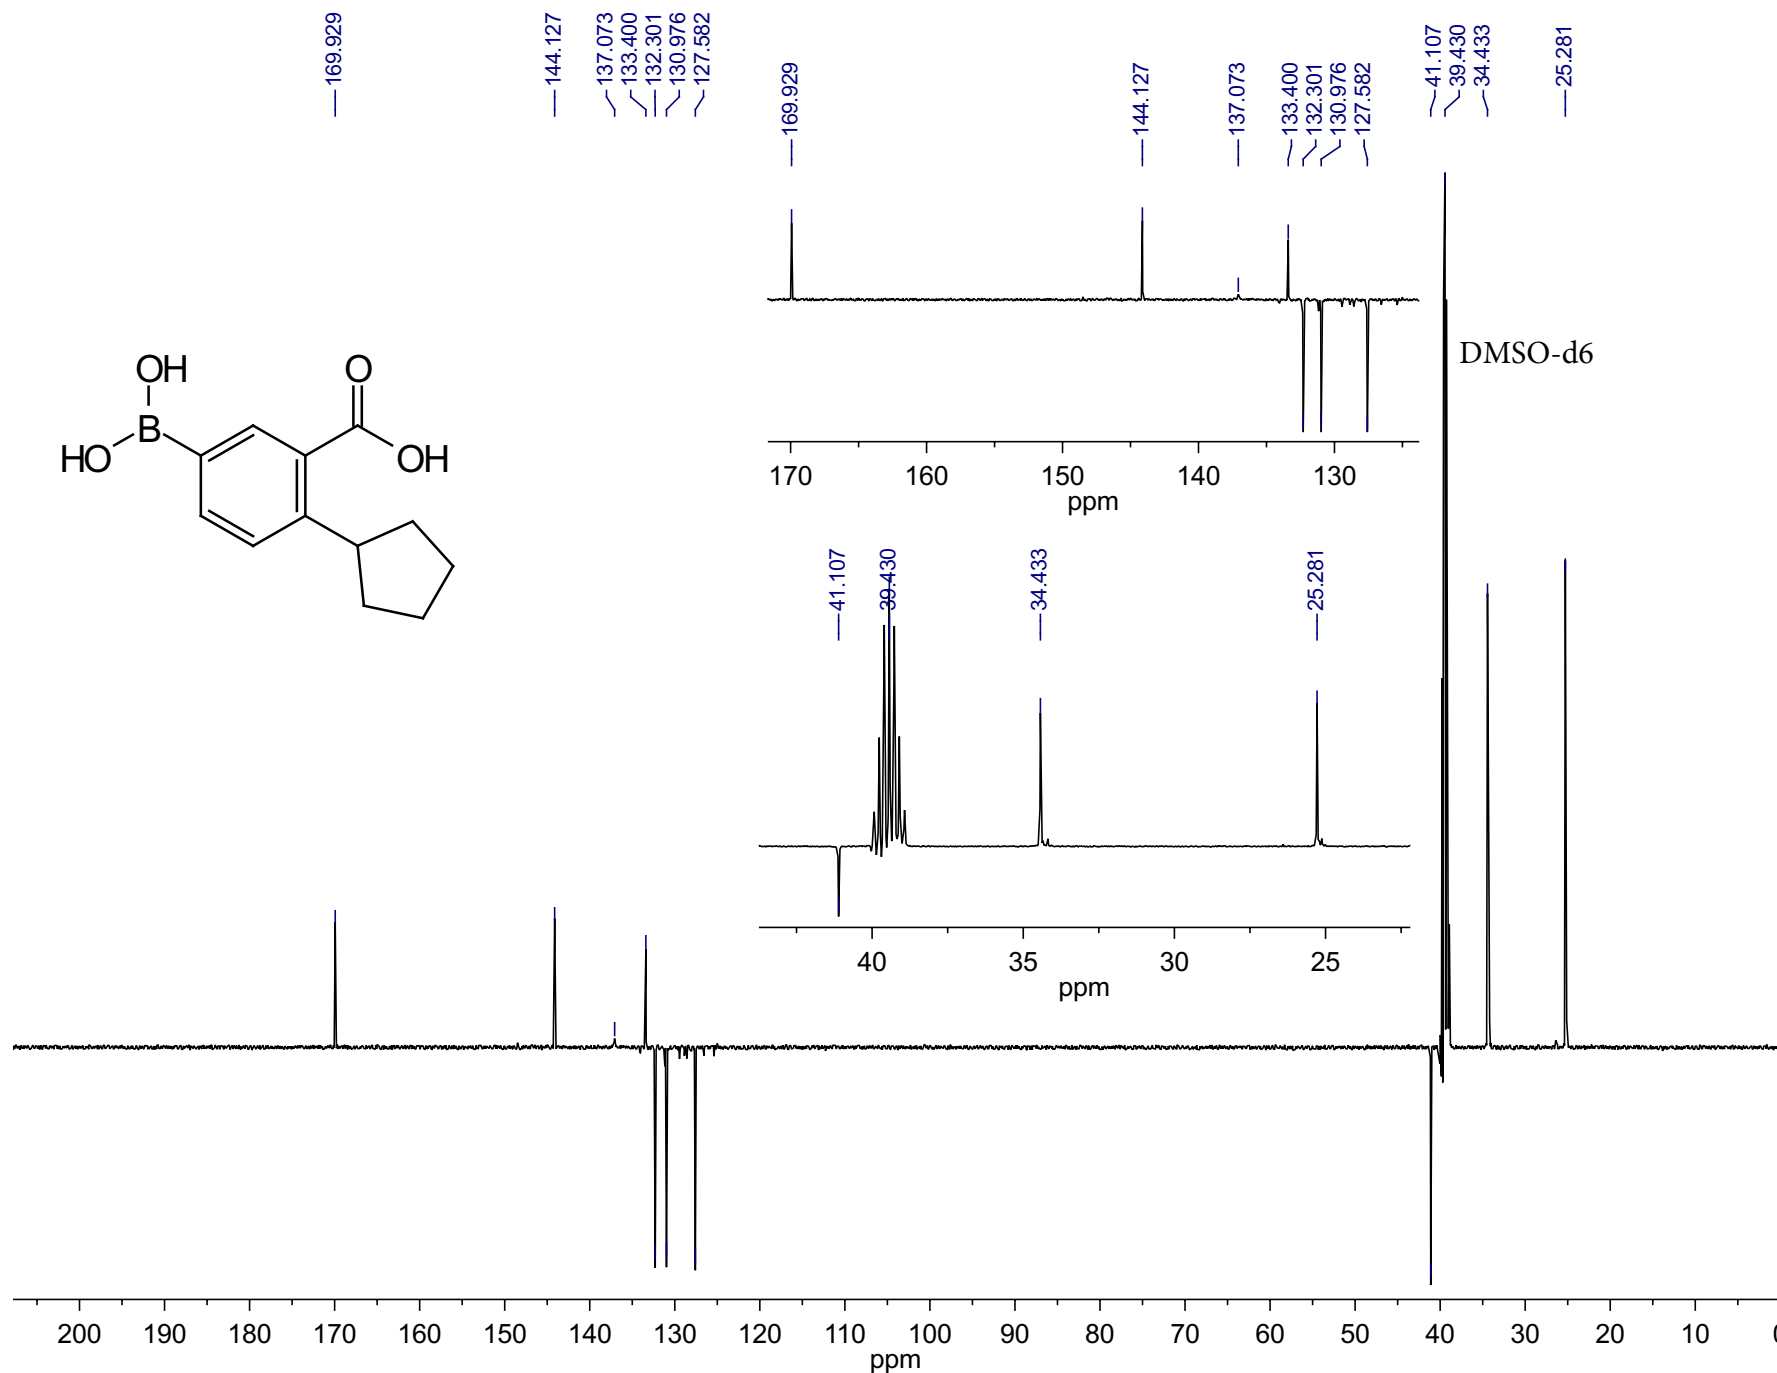

| Current Data Parameters     |                 |
|-----------------------------|-----------------|
| NAME                        | Kalogirou       |
| EXPNO                       | 538             |
| PROCNO                      | 1               |
| F2 - Acquisition Parameters |                 |
| Date_                       | 20180414        |
| Time                        | 18.17           |
| INSTRUM                     | spect           |
| PROBHD                      | 5 mm PABBO BB-  |
| PULPROG                     | jmod            |
| TD                          | 65536           |
| SOLVENT                     | DMSO            |
| NS                          | 8192            |
| DS                          | 4               |
| SWH                         | 29761.904 Hz    |
| FIDRES                      | 0.454131 Hz     |
| AQ                          | 1.1010048 sec   |
| RG                          | 1820            |
| DW                          | 16.800 usec     |
| DE                          | 6.50 usec       |
| TE                          | 296.1 K         |
| CNST2                       | 145.000000      |
| CNST11                      | 1.000000        |
| D1                          | 2.0000000 sec   |
| D20                         | 0.00689655 sec  |
| TD0                         | 1               |
| ===== CHANNEL f1 =====      |                 |
| SFO1                        | 125.7459782 MHz |
| NUC1                        | <sup>13</sup> C |
| P1                          | 9.40 usec       |
| P2                          | 18.80 usec      |
| PLW1                        | 140.0000000 W   |
| ===== CHANNEL f2 =====      |                 |
| SFO2                        | 500.0350280 MHz |
| NUC2                        | <sup>1</sup> H  |
| CPDPRG2                     | waltz16         |
| PCPD2                       | 80.00 usec      |
| PLW2                        | 14.80000019 W   |
| PLW12                       | 0.33300000 W    |
| F2 - Processing parameters  |                 |
| SI                          | 32768           |
| SF                          | 125.7334049 MHz |
| WDW                         | EM              |
| SSB                         | 0               |
| LB                          | 1.00 Hz         |
| GB                          | 0               |
| PC                          | 1.40            |

<sup>1</sup>H-NMR of 3-chloro-5-((3-hydroxy-4-methylphenyl)amino)-4H-1,2,6-thiadiazin-4-one (7)

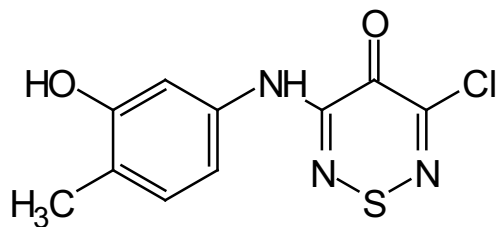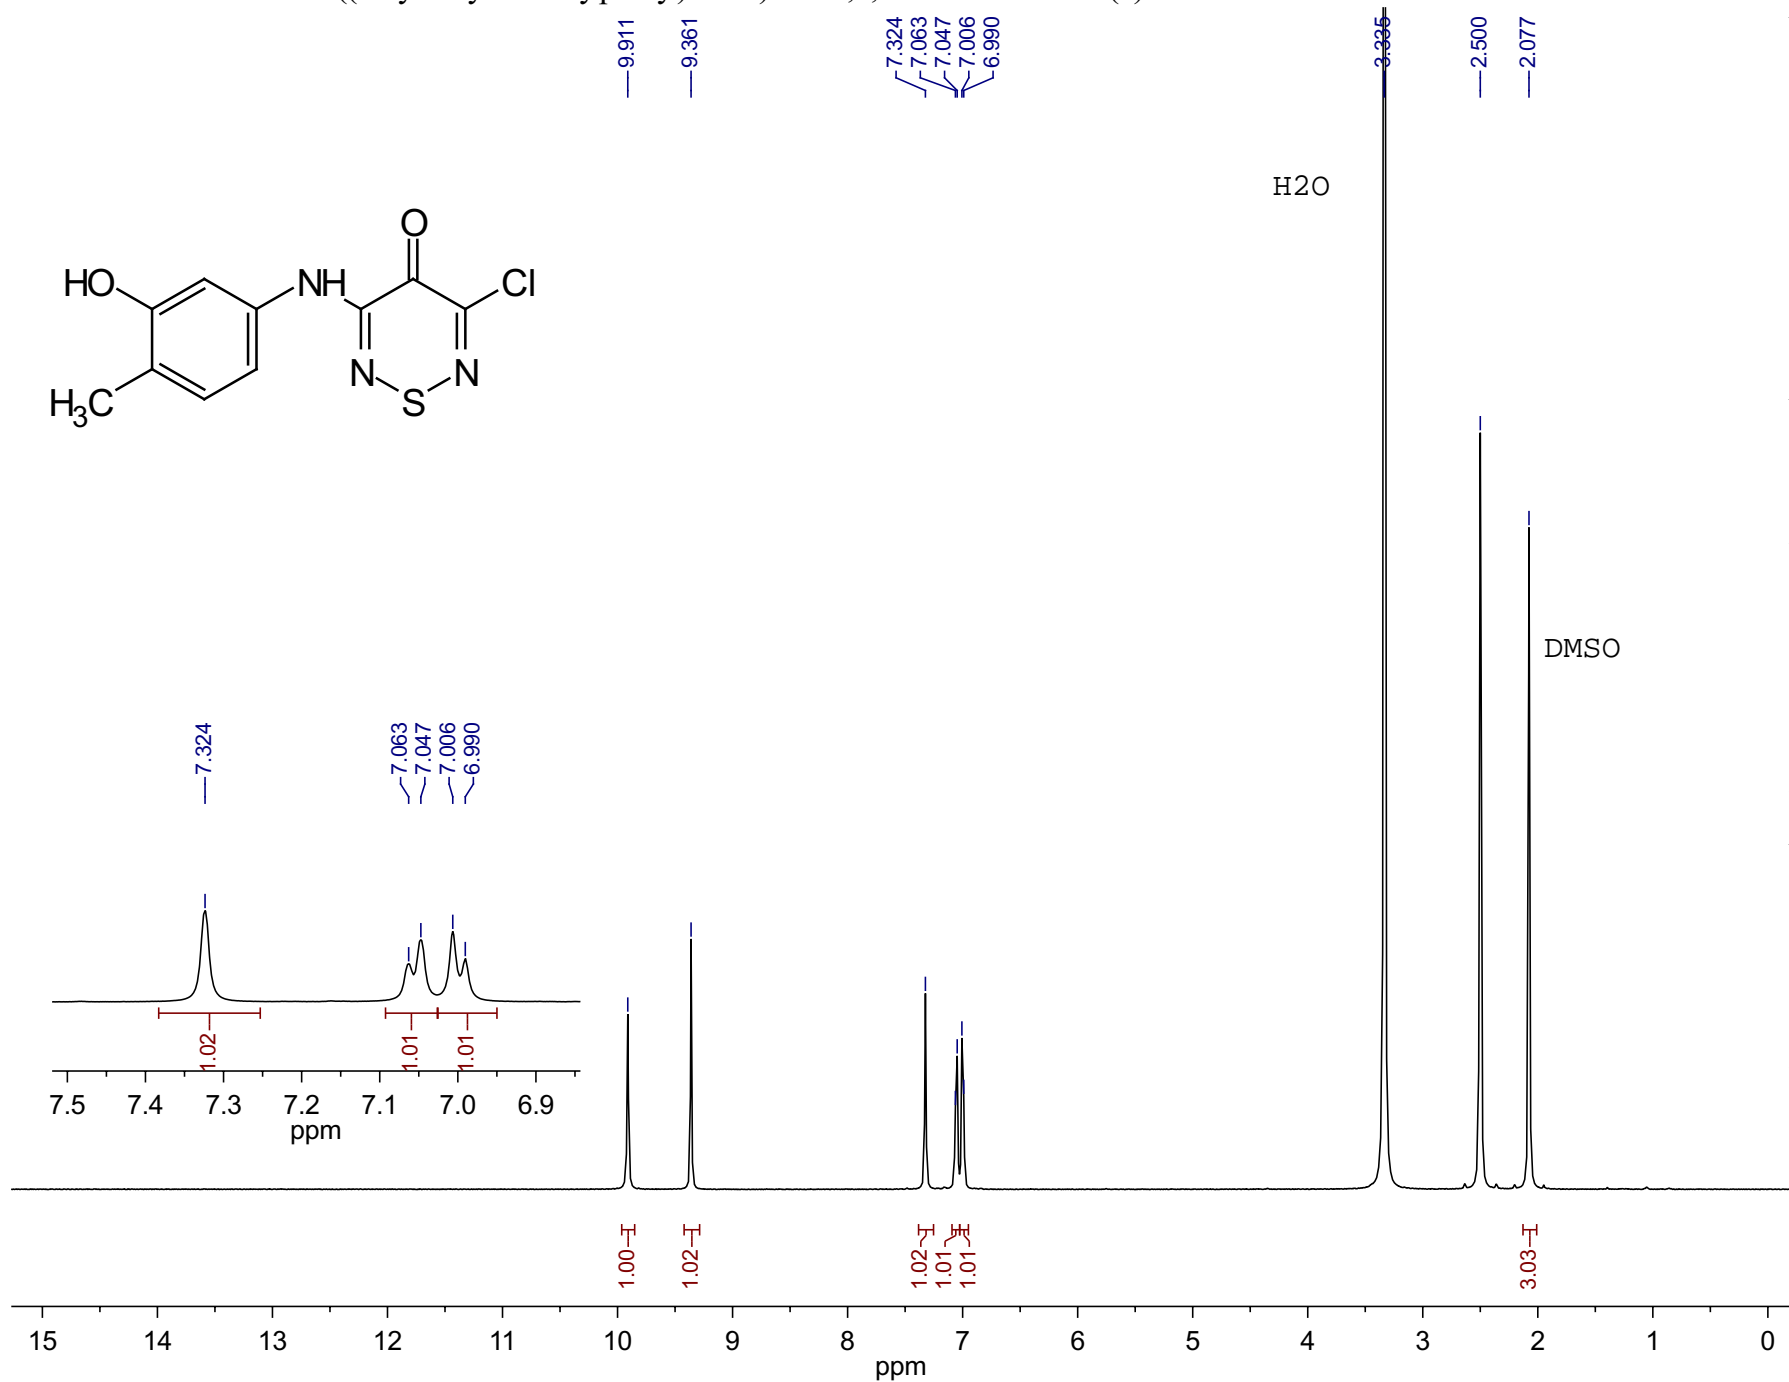

Current Data Parameters

NAME Kalogirou  
EXPNO 30  
PROCNO 1

F2 - Acquisition Parameters

Date\_ 20160510  
Time 20.20  
INSTRUM spect  
PROBHD 5 mm PABBO BB-  
PULPROG zg30  
TD 65536  
SOLVENT DMSO  
NS 16  
DS 2  
SWH 10000.000 Hz  
FIDRES 0.152588 Hz  
AQ 3.2767999 sec  
RG 128  
DW 50.000 usec  
DE 6.50 usec  
TE 297.8 K  
D1 1.00000000 sec  
TD0 1

CHANNEL f1

SFO1 500.0361158 MHz  
NUC1 1H  
P1 12.00 usec  
PLW1 14.50000000 W

F2 - Processing parameters

SI 65536  
SF 500.0330321 MHz  
WDW EM  
SSB 0  
LB 0.30 Hz  
GB 0  
PC 1.00

<sup>13</sup>C-NMR of 3-chloro-5-((3-hydroxy-4-methylphenyl)amino)-4*H*-1,2,6-thiadiazin-4-one (7)

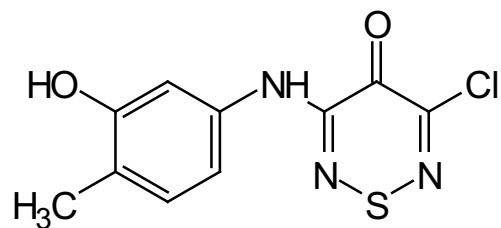

157.047  
155.072  
150.035  
140.650  
136.176  
130.129  
119.966  
111.758  
107.382

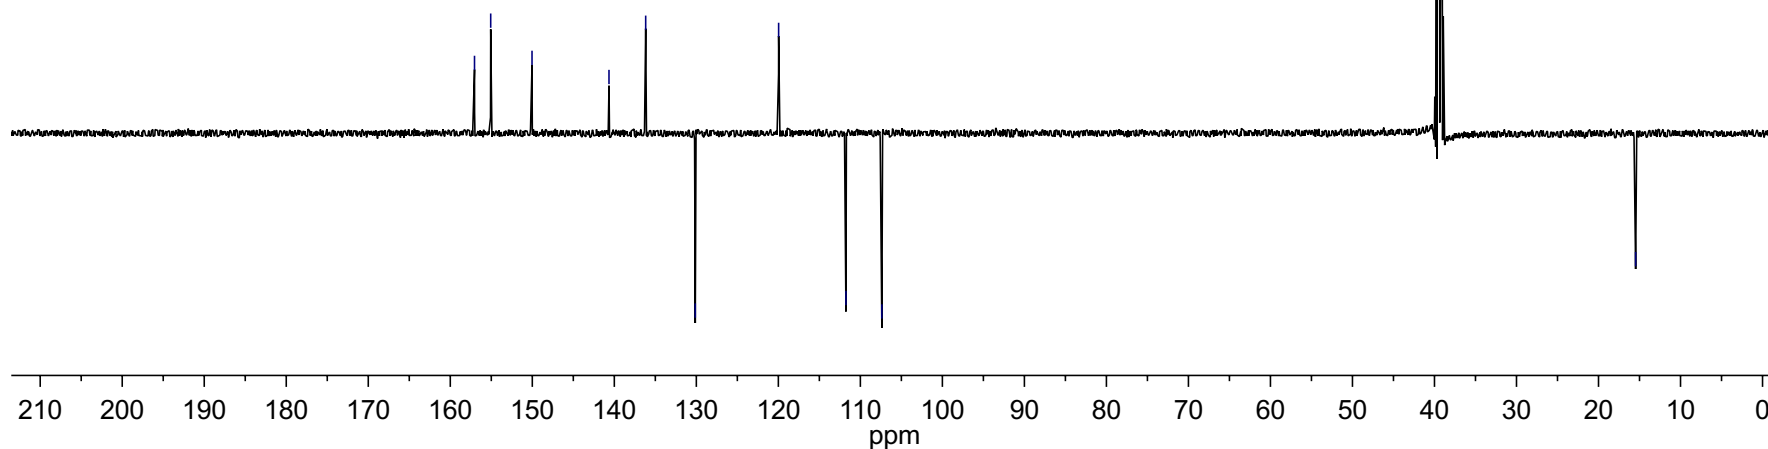

S16

Current Data Parameters

|                             |                 |
|-----------------------------|-----------------|
| NAME                        | Kalogirou       |
| EXPNO                       | 31              |
| PROCNO                      | 1               |
| F2 - Acquisition Parameters |                 |
| Date_                       | 20160510        |
| Time                        | 23.17           |
| INSTRUM                     | spect           |
| PROBHD                      | 5 mm PABBO BB-  |
| PULPROG                     | jmod            |
| TD                          | 65536           |
| SOLVENT                     | DMSO            |
| NS                          | 3328            |
| DS                          | 4               |
| SWH                         | 29761.904 Hz    |
| FIDRES                      | 0.454131 Hz     |
| AQ                          | 1.1010048 sec   |
| RG                          | 2050            |
| DW                          | 16.800 usec     |
| DE                          | 6.50 usec       |
| TE                          | 299.0 K         |
| CNST2                       | 145.000000      |
| CNST11                      | 1.000000        |
| D1                          | 2.00000000 sec  |
| D20                         | 0.00689655 sec  |
| TD0                         | 1               |
| ===== CHANNEL f1 =====      |                 |
| SFO1                        | 125.7459782 MHz |
| NUC1                        | 13C             |
| P1                          | 9.00 usec       |
| P2                          | 18.00 usec      |
| PLW1                        | 133.00000000 W  |
| ===== CHANNEL f2 =====      |                 |
| SFO2                        | 500.0350280 MHz |
| NUC2                        | 1H              |
| CPDPRG2                     | waltz16         |
| PCPD2                       | 80.00 usec      |
| PLW2                        | 14.50000000 W   |
| PLW12                       | 0.32624999 W    |
| F2 - Processing parameters  |                 |
| SI                          | 32768           |
| SF                          | 125.7334656 MHz |
| WDW                         | EM              |
| SSB                         | 0               |
| LB                          | 1.00 Hz         |
| GB                          | 0               |
| PC                          | 1.40            |



<sup>1</sup>H-NMR of 2-((5-chloro-4-oxo-4*H*-1,2,6-thiadiazin-3-yl)amino)-*N*-methylbenzamide (**8**)

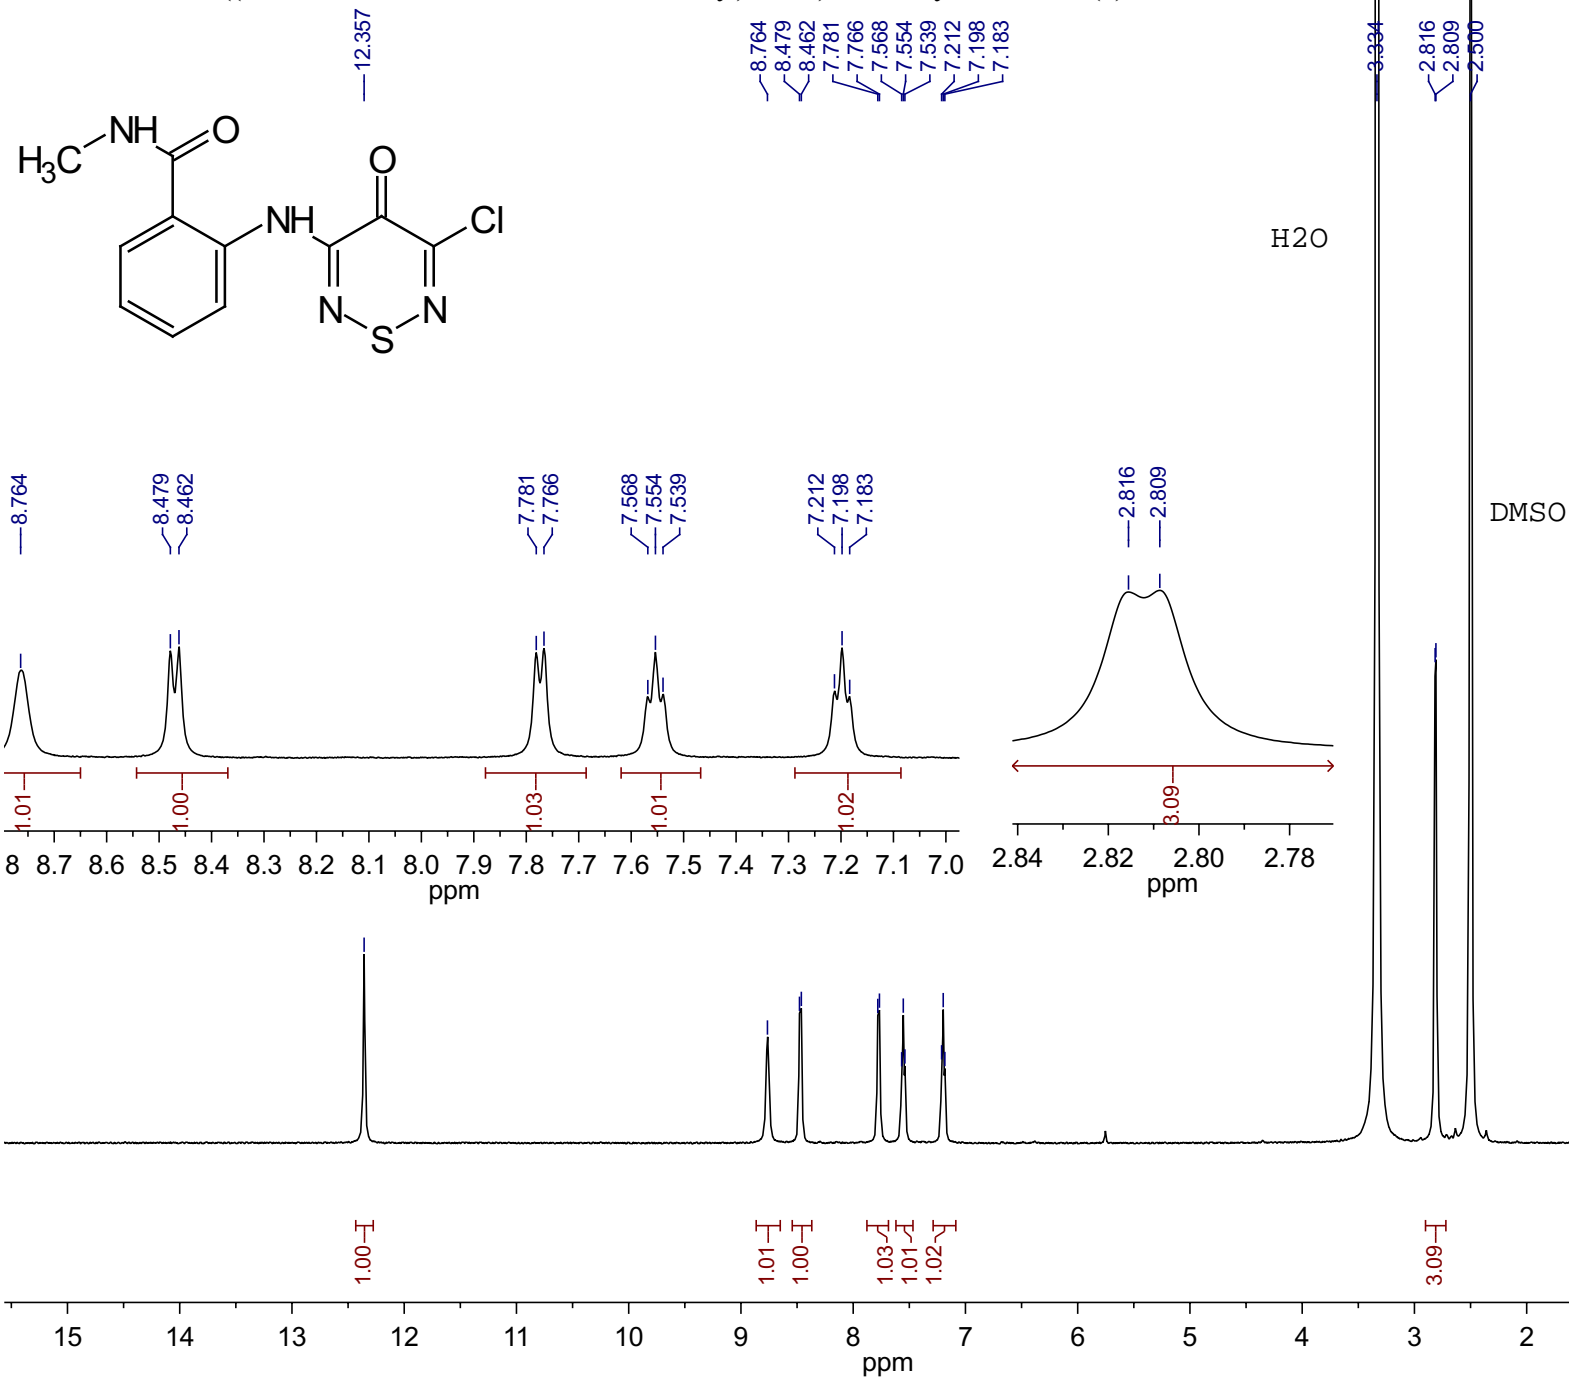

Current Data Parameters

NAME Kalogirou  
EXPNO 32  
PROCNO 1

F2 - Acquisition Parameters

Date\_ 20160511  
Time 19.26  
INSTRUM spect  
PROBHD 5 mm PABBO BB-  
PULPROG zg30  
TD 65536  
SOLVENT DMSO  
NS 16  
DS 2  
SWH 10000.000 Hz  
FIDRES 0.152588 Hz  
AQ 3.2767999 sec  
RG 128  
DW 50.000 usec  
DE 6.50 usec  
TE 297.6 K  
D1 1.00000000 sec  
TD0 1

CHANNEL f1

SFO1 500.0361158 MHz  
NUC1 1H  
P1 12.00 usec  
PLW1 14.50000000 W

F2 - Processing parameters

SI 65536  
SF 500.0330322 MHz  
WDW EM  
SSB 0  
LB 0.30 Hz  
GB 0  
PC 1.00

<sup>13</sup>C-NMR of 2-((5-chloro-4-oxo-4*H*-1,2,6-thiadiazin-3-yl)amino)-*N*-methylbenzamide (**8**)

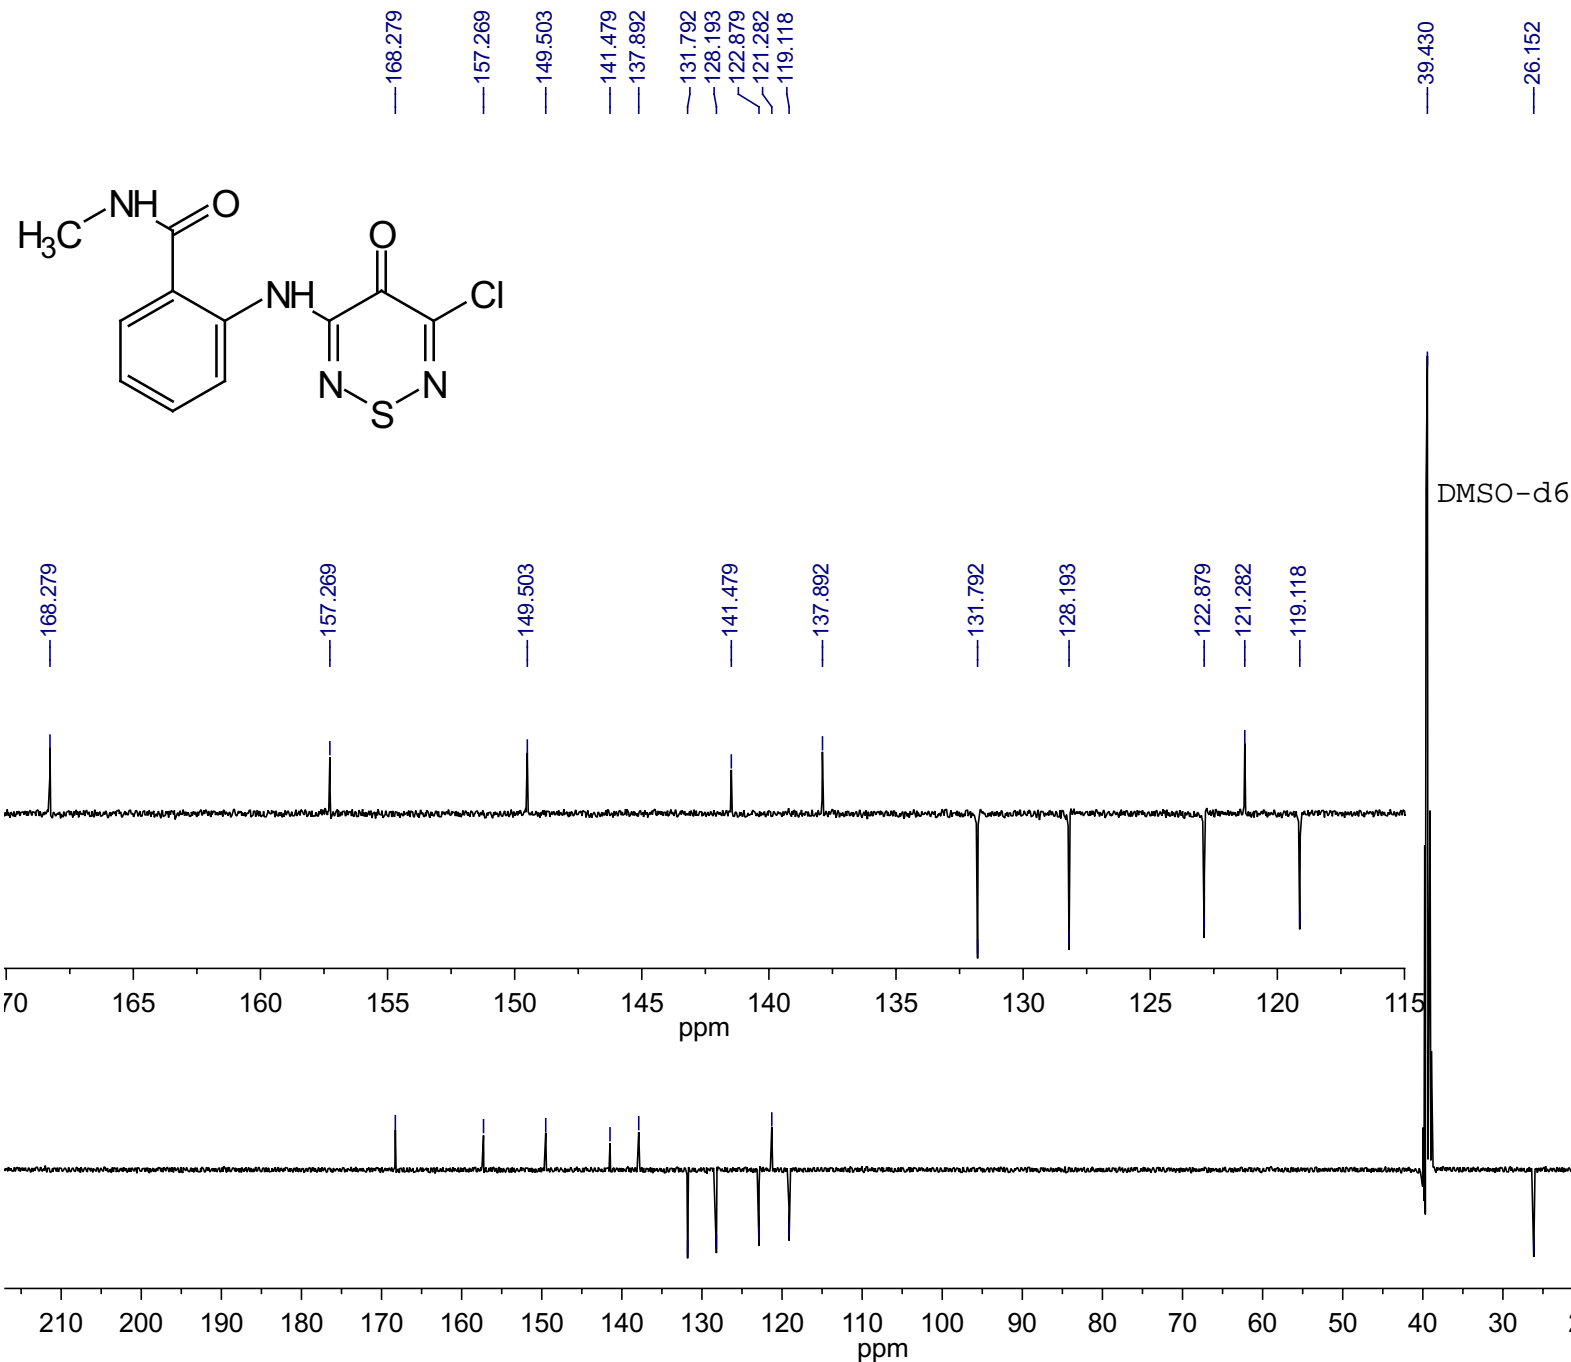

Current Data Parameters

|                             |                 |
|-----------------------------|-----------------|
| NAME                        | Kalogirou       |
| EXPNO                       | 33              |
| PROCNO                      | 1               |
| F2 - Acquisition Parameters |                 |
| Date_                       | 20160511        |
| Time                        | 22.03           |
| INSTRUM                     | spect           |
| PROBHD                      | 5 mm PABBO BB-  |
| PULPROG                     | jmod            |
| TD                          | 65536           |
| SOLVENT                     | DMSO            |
| NS                          | 4608            |
| DS                          | 4               |
| SWH                         | 29761.904 Hz    |
| FIDRES                      | 0.454131 Hz     |
| AQ                          | 1.1010048 sec   |
| RG                          | 2050            |
| DW                          | 16.800 usec     |
| DE                          | 6.50 usec       |
| TE                          | 299.0 K         |
| CNST2                       | 145.0000000     |
| CNST11                      | 1.0000000       |
| D1                          | 2.00000000 sec  |
| D20                         | 0.00689655 sec  |
| TD0                         | 1               |
| ===== CHANNEL f1 =====      |                 |
| SFO1                        | 125.7459782 MHz |
| NUC1                        | 13C             |
| P1                          | 9.00 usec       |
| P2                          | 18.00 usec      |
| PLW1                        | 133.00000000 W  |
| ===== CHANNEL f2 =====      |                 |
| SFO2                        | 500.0350280 MHz |
| NUC2                        | 1H              |
| CPDPRG[2]                   | waltz16         |
| PCPD2                       | 80.00 usec      |
| PLW2                        | 14.50000000 W   |
| PLW12                       | 0.32624999 W    |
| F2 - Processing parameters  |                 |
| SI                          | 32768           |
| SF                          | 125.7334653 MHz |
| WDW                         | EM              |
| SSB                         | 0               |
| LB                          | 1.00 Hz         |
| GB                          | 0               |
| PC                          | 1.40            |

<sup>1</sup>H-NMR of 3-((4-(1H-imidazol-2-yl)phenyl)amino)-5-chloro-4H-1,2,6-thiadiazin-4-one (**21**)

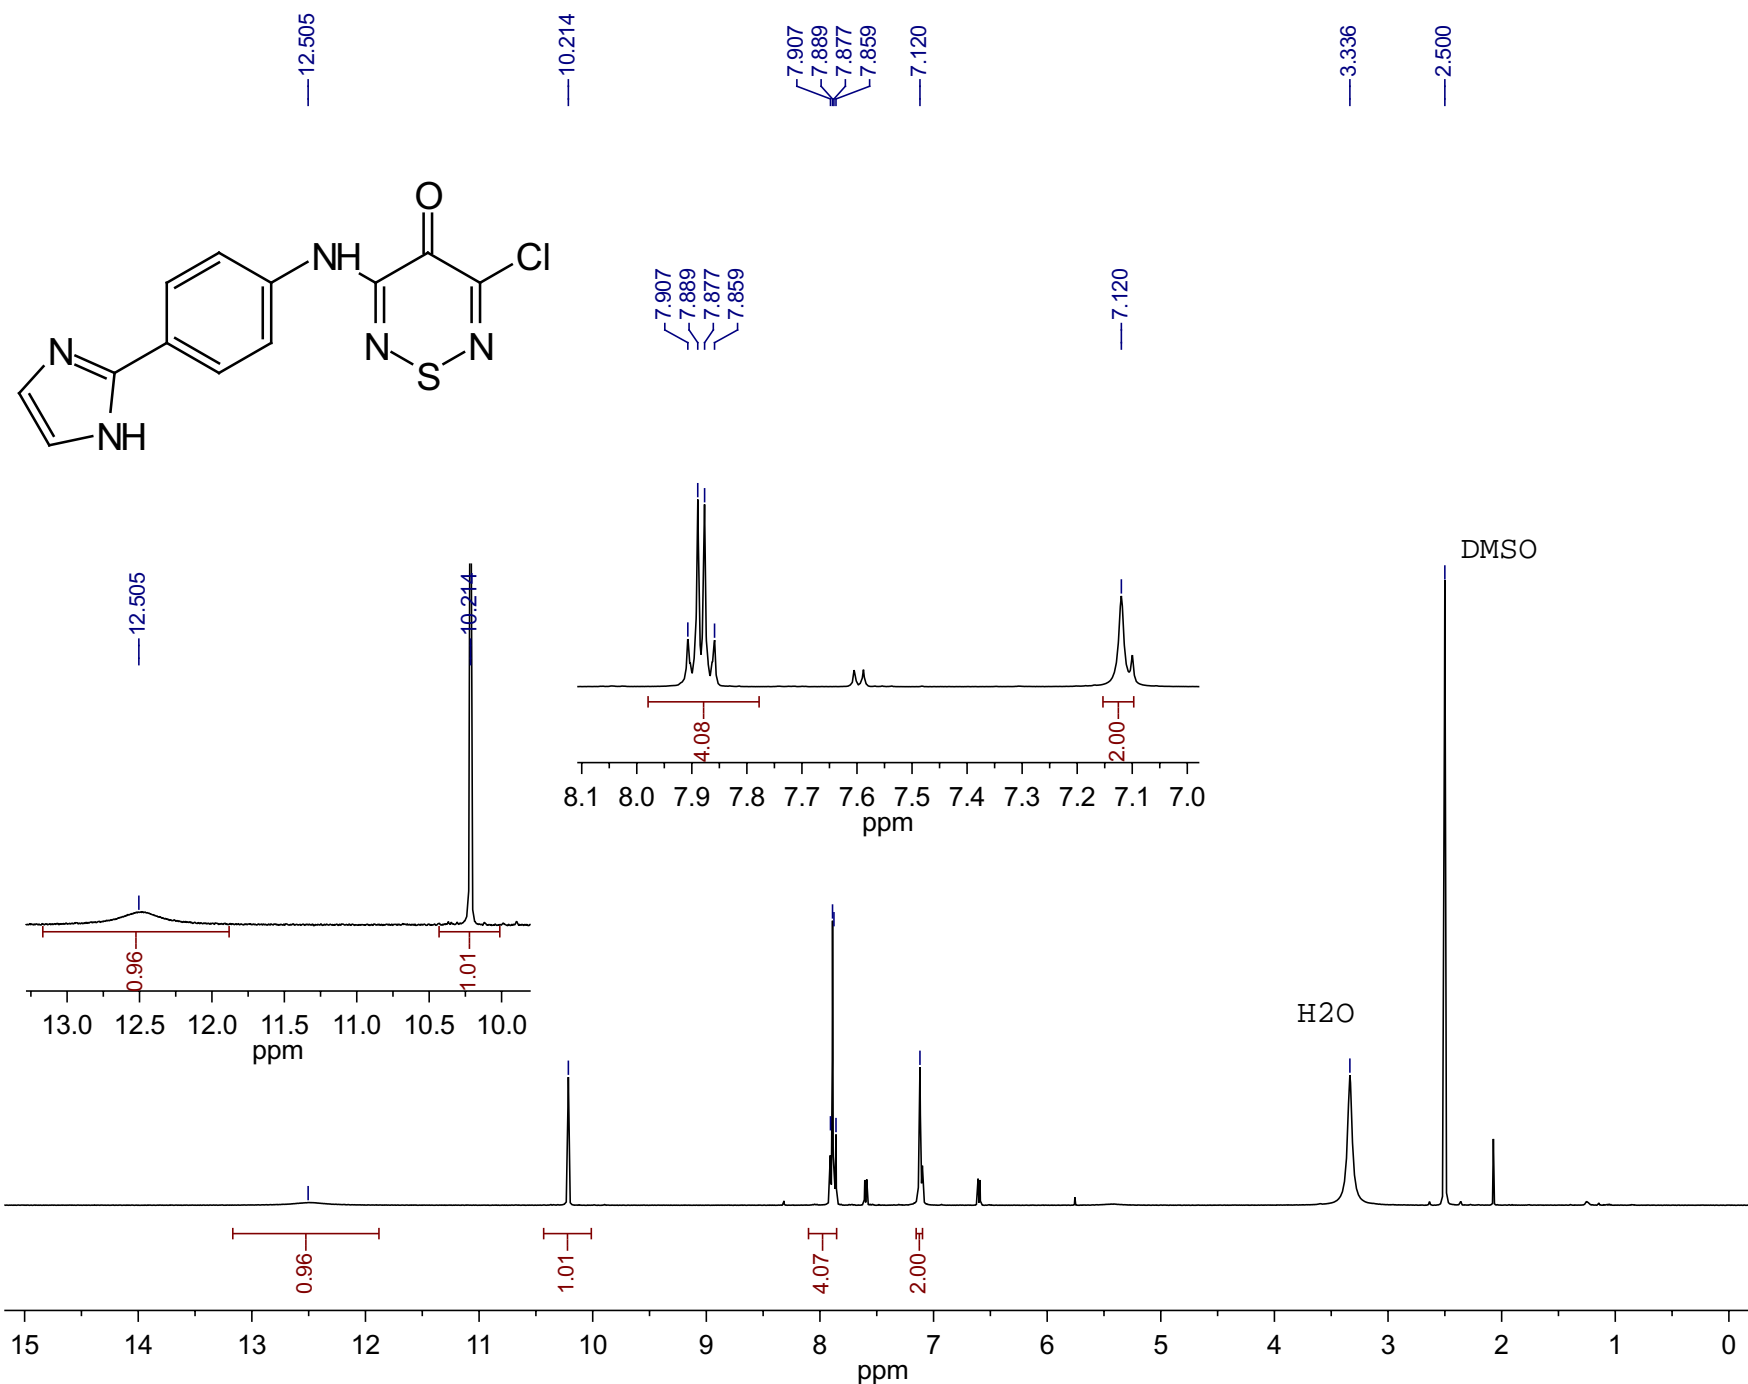

Current Data Parameters

NAME Kalogirou  
EXPNO 417  
PROCNO 1

F2 - Acquisition Parameters

Date\_ 20170923  
Time 0.50  
INSTRUM spect  
PROBHD 5 mm PABBO BB-  
PULPROG zg30  
TD 65536  
SOLVENT DMSO  
NS 16  
DS 2  
SWH 10000.000 Hz  
FIDRES 0.152588 Hz  
AQ 3.2767999 sec  
RG 161  
DW 50.000 usec  
DE 6.50 usec  
TE 296.9 K  
D1 1.00000000 sec  
TD0 1

CHANNEL f1

SFO1 500.0361158 MHz  
NUC1 <sup>1</sup>H  
P1 12.00 usec  
PLW1 14.50000000 W

F2 - Processing parameters

SI 65536  
SF 500.0330319 MHz  
WDW EM  
SSB 0  
LB 0.30 Hz  
GB 0  
PC 1.00

<sup>13</sup>C-NMR of 3-((4-(1H-imidazol-2-yl)phenyl)amino)-5-chloro-4*H*-1,2,6-thiadiazin-4-one (**21**)

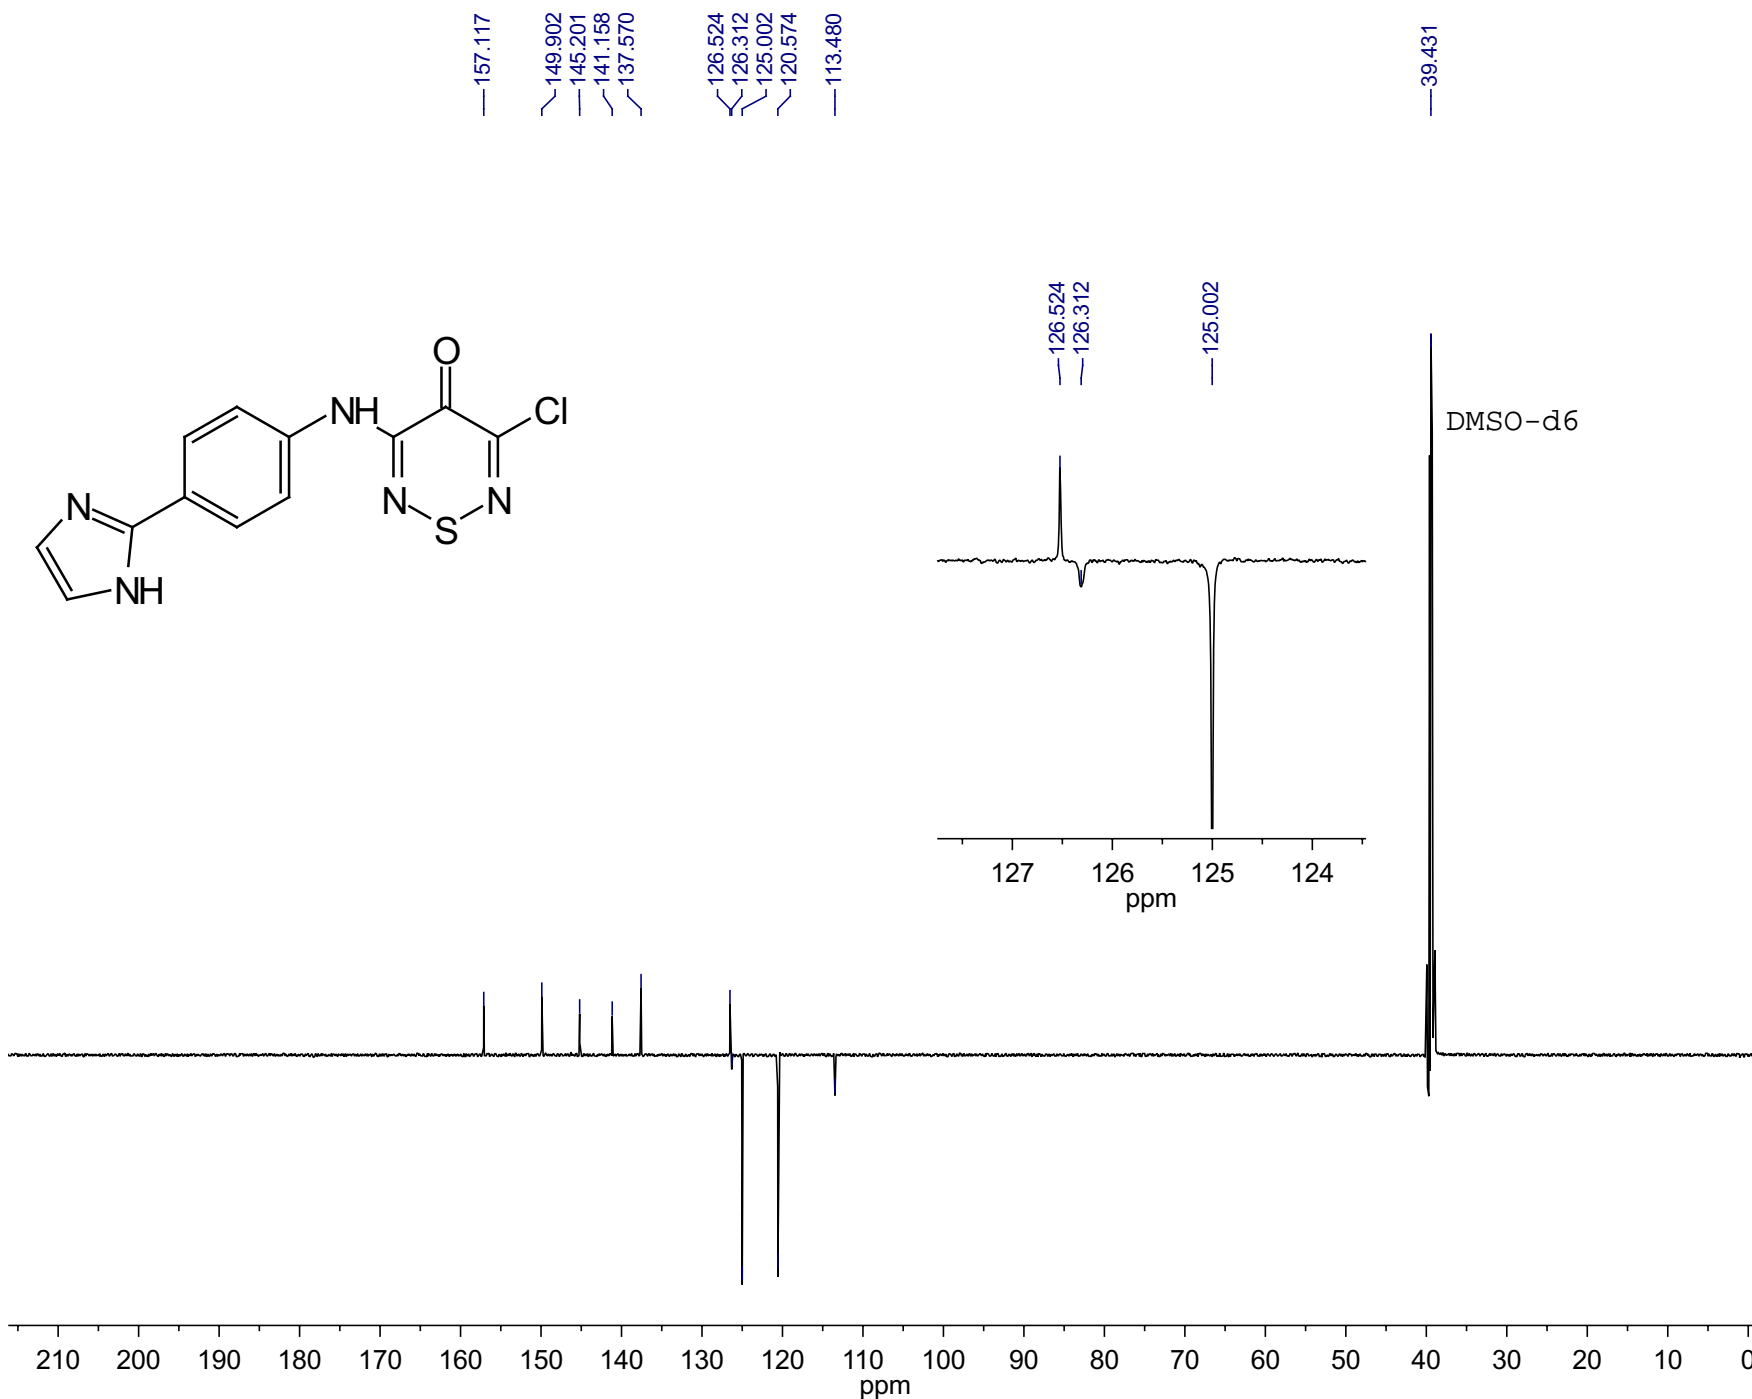

Current Data Parameters

|                             |                 |
|-----------------------------|-----------------|
| NAME                        | Kalogirou       |
| EXPNO                       | 418             |
| PROCNO                      | 1               |
| F2 - Acquisition Parameters |                 |
| Date_                       | 20170923        |
| Time                        | 8.55            |
| INSTRUM                     | spect           |
| PROBHD                      | 5 mmPABBO BB-   |
| PULPROG                     | jmod            |
| TD                          | 65536           |
| SOLVENT                     | DMSO            |
| NS                          | 9216            |
| DS                          | 4               |
| SWH                         | 29761.904 Hz    |
| FIDRES                      | 0.454131 Hz     |
| AQ                          | 1.1010048 sec   |
| RG                          | 2050            |
| DW                          | 16.800 usec     |
| DE                          | 6.50 usec       |
| TE                          | 297.8 K         |
| CNST2                       | 145.0000000     |
| CNST11                      | 1.0000000       |
| D1                          | 2.00000000 sec  |
| D20                         | 0.00689655 sec  |
| TD0                         | 1               |
| ===== CHANNEL f1 =====      |                 |
| SFO1                        | 125.7459782 MHz |
| NUC1                        | <sup>13</sup> C |
| P1                          | 9.00 usec       |
| P2                          | 18.00 usec      |
| PLW1                        | 140.00000000 W  |
| ===== CHANNEL f2 =====      |                 |
| SFO2                        | 500.0350280 MHz |
| NUC2                        | <sup>1</sup> H  |
| CPDPRG2                     | waltz16         |
| PCPD2                       | 80.00 usec      |
| PLW2                        | 14.50000000 W   |
| PLW12                       | 0.32624999 W    |
| F2 - Processing parameters  |                 |
| SI                          | 32768           |
| SF                          | 125.7334766 MHz |
| WDW                         | EM              |
| SSB                         | 0               |
| LB                          | 1.00 Hz         |
| GB                          | 0               |
| PC                          | 1.40            |

<sup>1</sup>H-NMR of 3-((5-((3-hydroxy-4-methylphenyl)amino)-4-oxo-4H-1,2,6-thiadiazin-3-yl)amino)-benzamide (1)

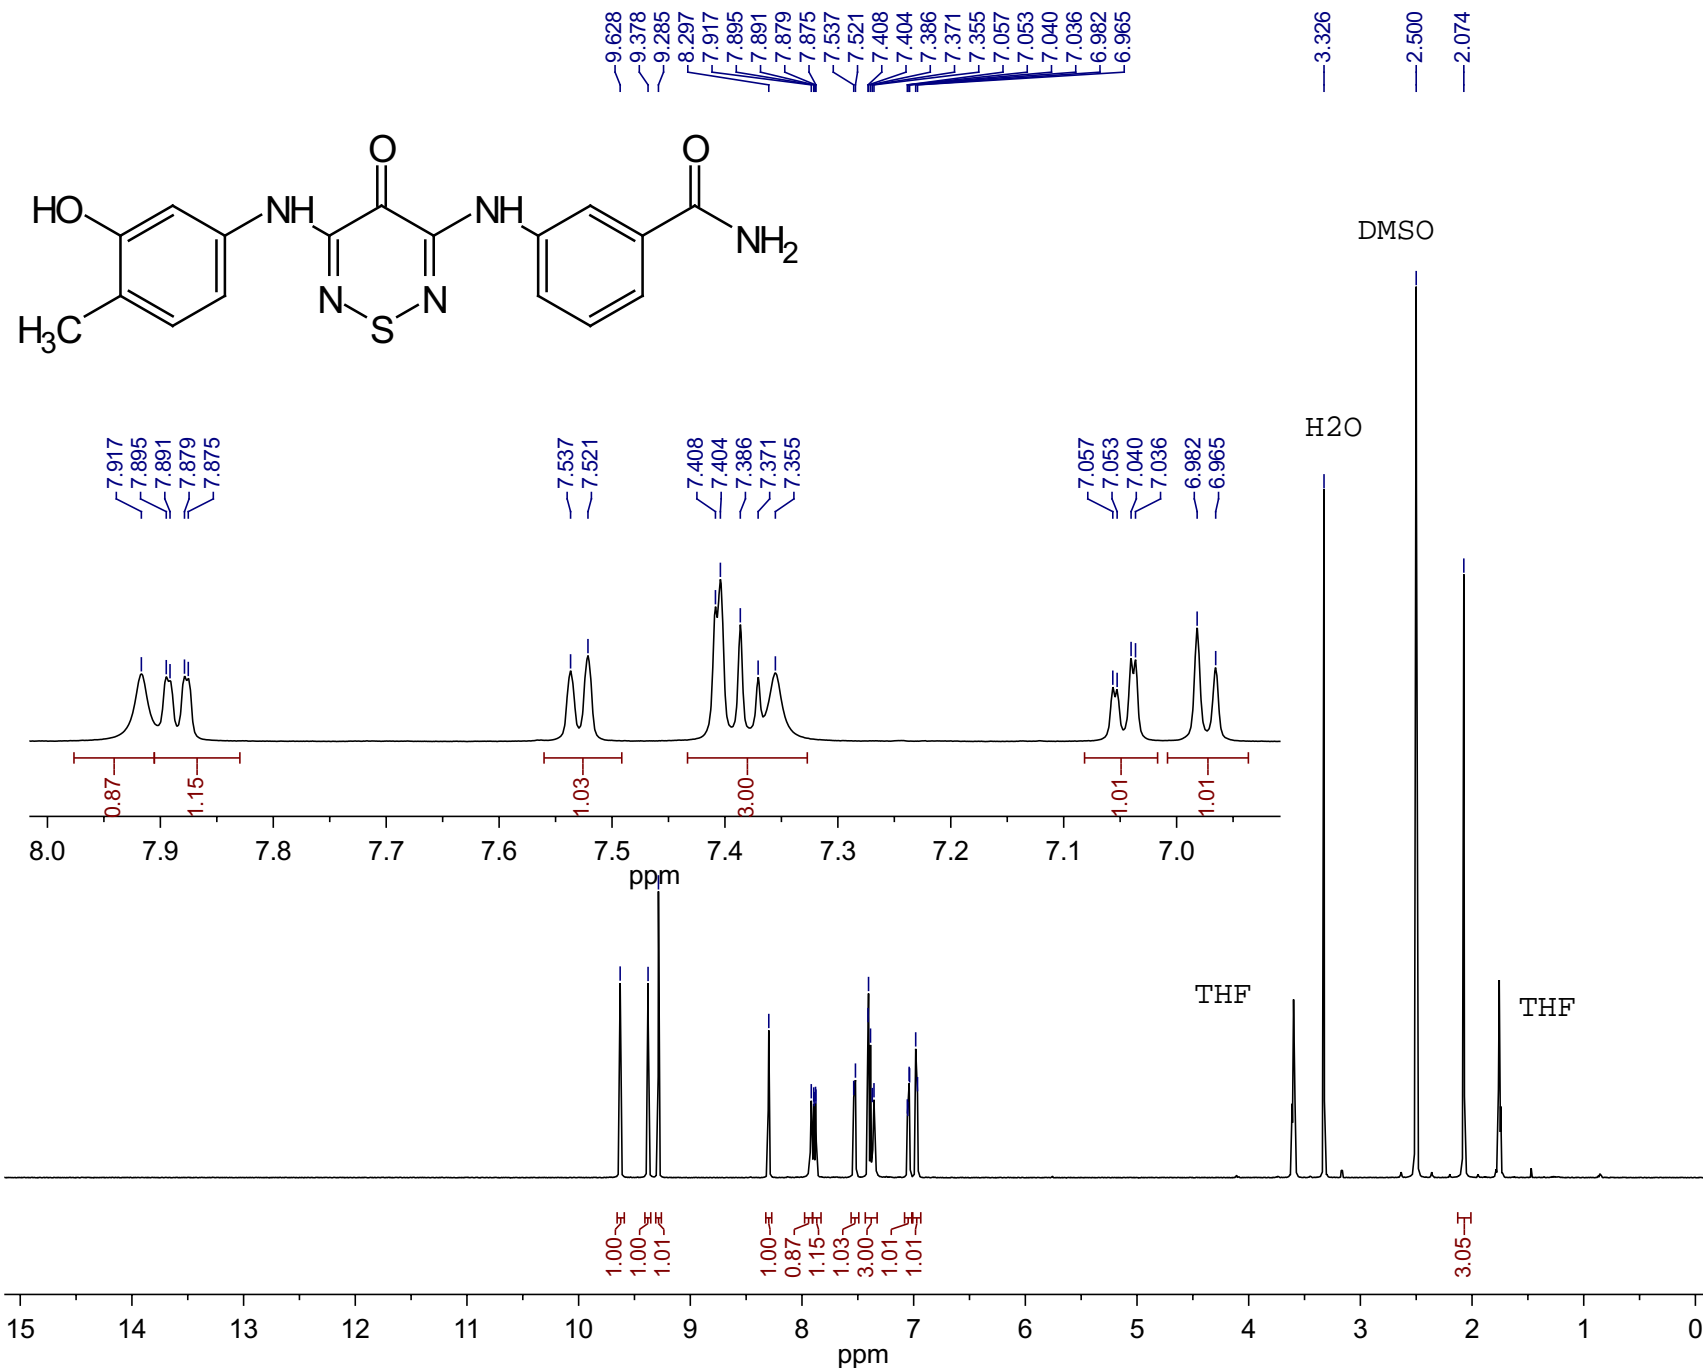

Current Data Parameters

NAME Kalogirou  
EXPNO 50  
PROCNO 1

F2 - Acquisition Parameters

Date\_ 20160520  
Time 15.04  
INSTRUM spect  
PROBHD 5 mm PABBO BB-  
PULPROG zg30  
TD 65536  
SOLVENT DMSO  
NS 16  
DS 2  
SWH 10000.000 Hz  
FIDRES 0.152588 Hz  
AQ 3.2767999 sec  
RG 144  
DW 50.000 usec  
DE 6.50 usec  
TE 297.9 K  
D1 1.00000000 sec  
TD0 1

CHANNEL f1

SFO1 500.0361158 MHz  
NUC1 1H  
P1 12.00 usec  
PLW1 14.50000000 W

F2 - Processing parameters

SI 65536  
SF 500.0330320 MHz  
WDW EM  
SSB 0  
LB 0.30 Hz  
GB 0  
PC 1.00

<sup>13</sup>C-NMR of 3-((5-((3-hydroxy-4-methylphenyl)amino)-4-oxo-4*H*-1,2,6-thiadiazin-3-yl)amino)-benzamide (1)

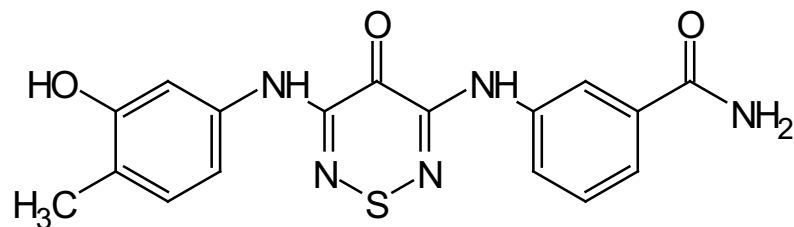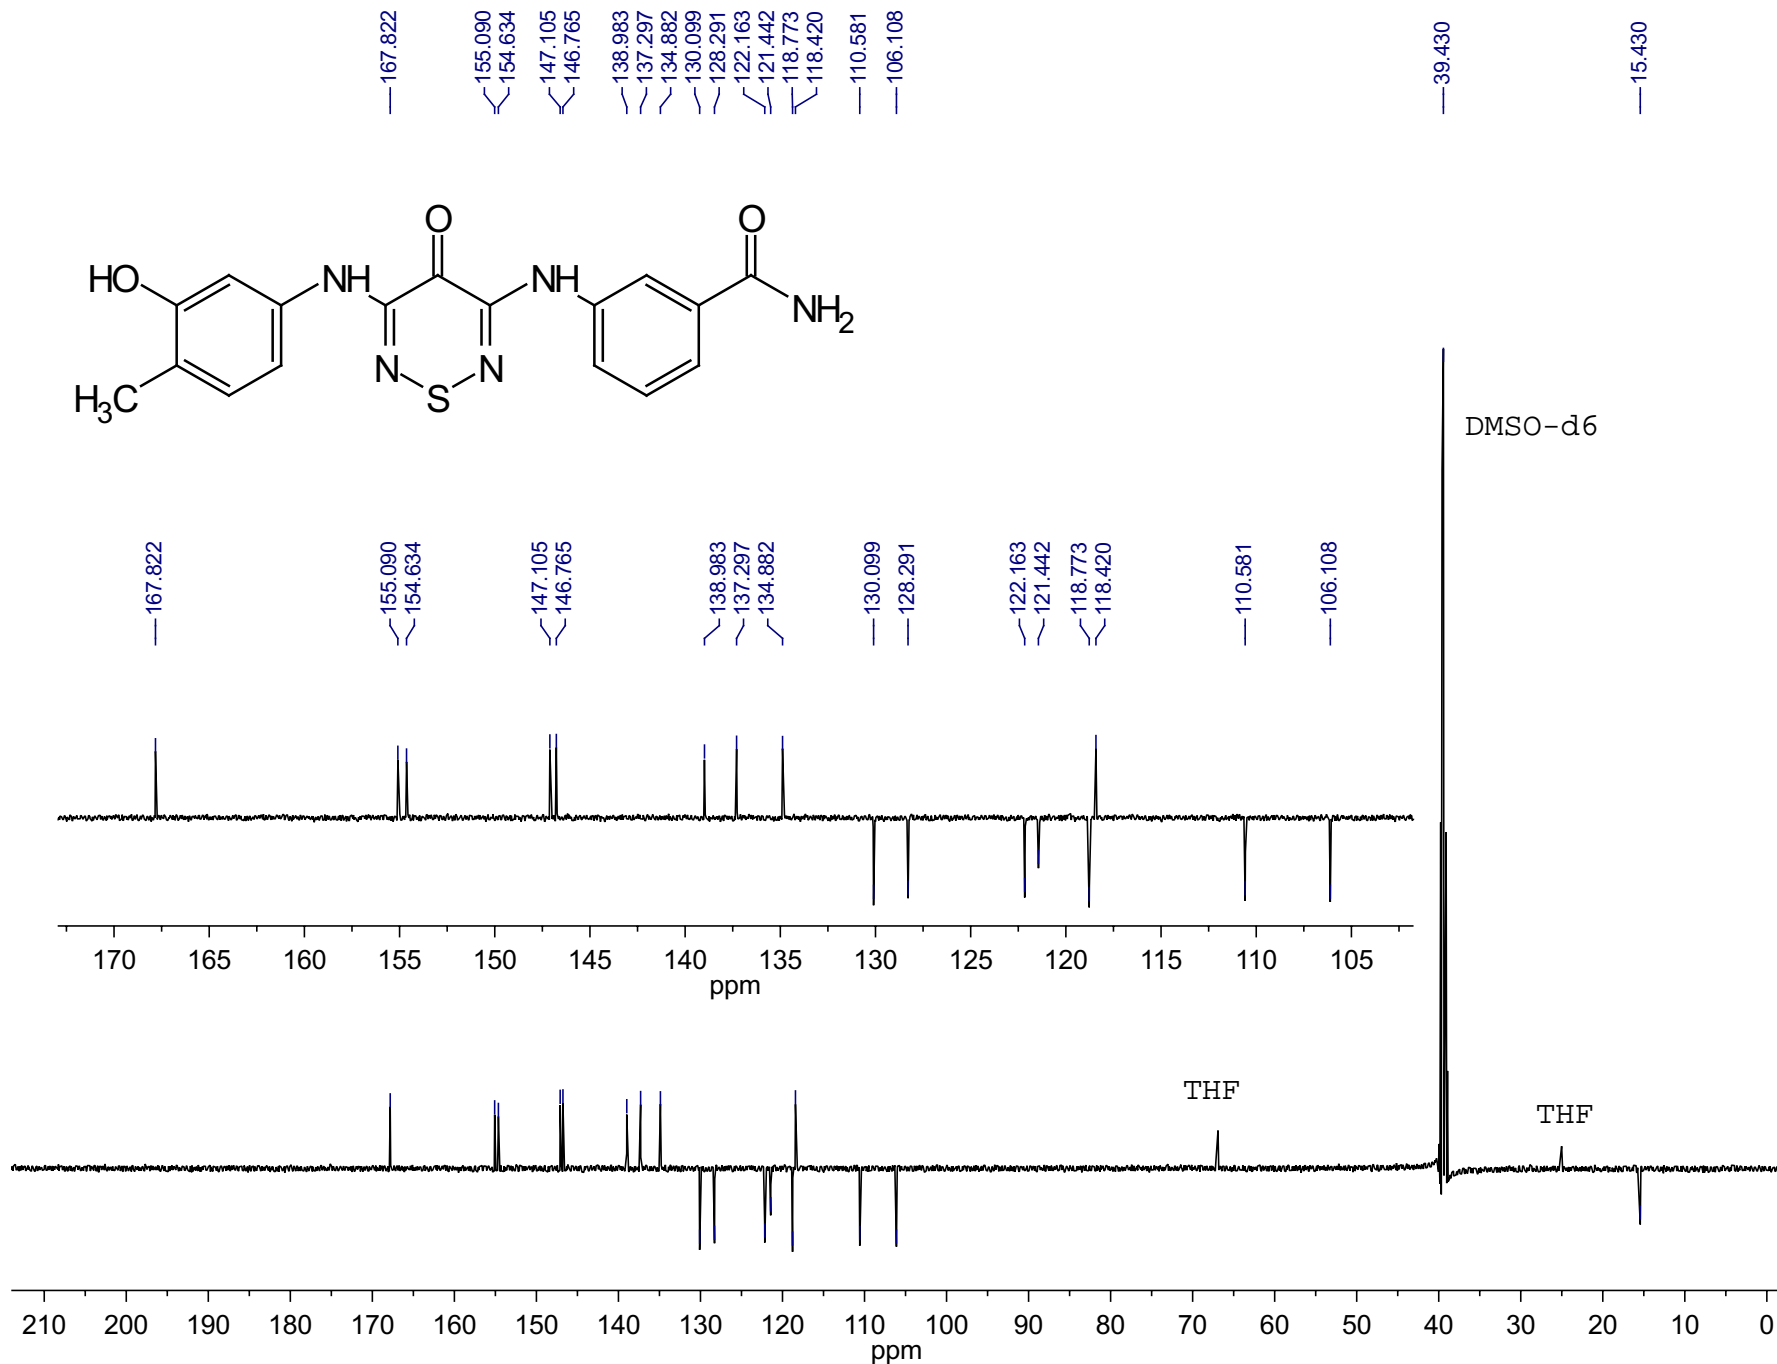

Current Data Parameters

|                             |                 |
|-----------------------------|-----------------|
| NAME                        | Kalogirou       |
| EXPNO                       | 51              |
| PROCNO                      | 1               |
| F2 - Acquisition Parameters |                 |
| Date_                       | 20160520        |
| Time                        | 15.13           |
| INSTRUM                     | spect           |
| PROBHD                      | 5 mm PABBO BB-  |
| PULPROG                     | jmod            |
| TD                          | 65536           |
| SOLVENT                     | DMSO            |
| NS                          | 3072            |
| DS                          | 4               |
| SWH                         | 29761.904 Hz    |
| FIDRES                      | 0.454131 Hz     |
| AQ                          | 1.1010048 sec   |
| RG                          | 2050            |
| DW                          | 16.800 usec     |
| DE                          | 6.50 usec       |
| TE                          | 298.9 K         |
| CNST2                       | 145.000000      |
| CNST11                      | 1.000000        |
| D1                          | 2.0000000 sec   |
| D20                         | 0.00689655 sec  |
| TD0                         | 1               |
| ===== CHANNEL f1 =====      |                 |
| SFO1                        | 125.7459782 MHz |
| NUC1                        | <sup>13</sup> C |
| P1                          | 9.00 usec       |
| P2                          | 18.00 usec      |
| PLW1                        | 133.0000000 W   |
| ===== CHANNEL f2 =====      |                 |
| SFO2                        | 500.0350280 MHz |
| NUC2                        | <sup>1</sup> H  |
| CPDPRG2                     | waltz16         |
| PCPD2                       | 80.00 usec      |
| PLW2                        | 14.5000000 W    |
| PLW12                       | 0.32624999 W    |
| F2 - Processing parameters  |                 |
| SI                          | 32768           |
| SF                          | 125.7334672 MHz |
| WDW                         | EM              |
| SSB                         | 0               |
| LB                          | 1.00 Hz         |
| GB                          | 0               |
| PC                          | 1.40            |

<sup>1</sup>H-NMR of 4-((5-((3-hydroxy-4-methylphenyl)amino)-4-oxo-4H-1,2,6-thiadiazin-3-yl)amino)-benzamide (2)

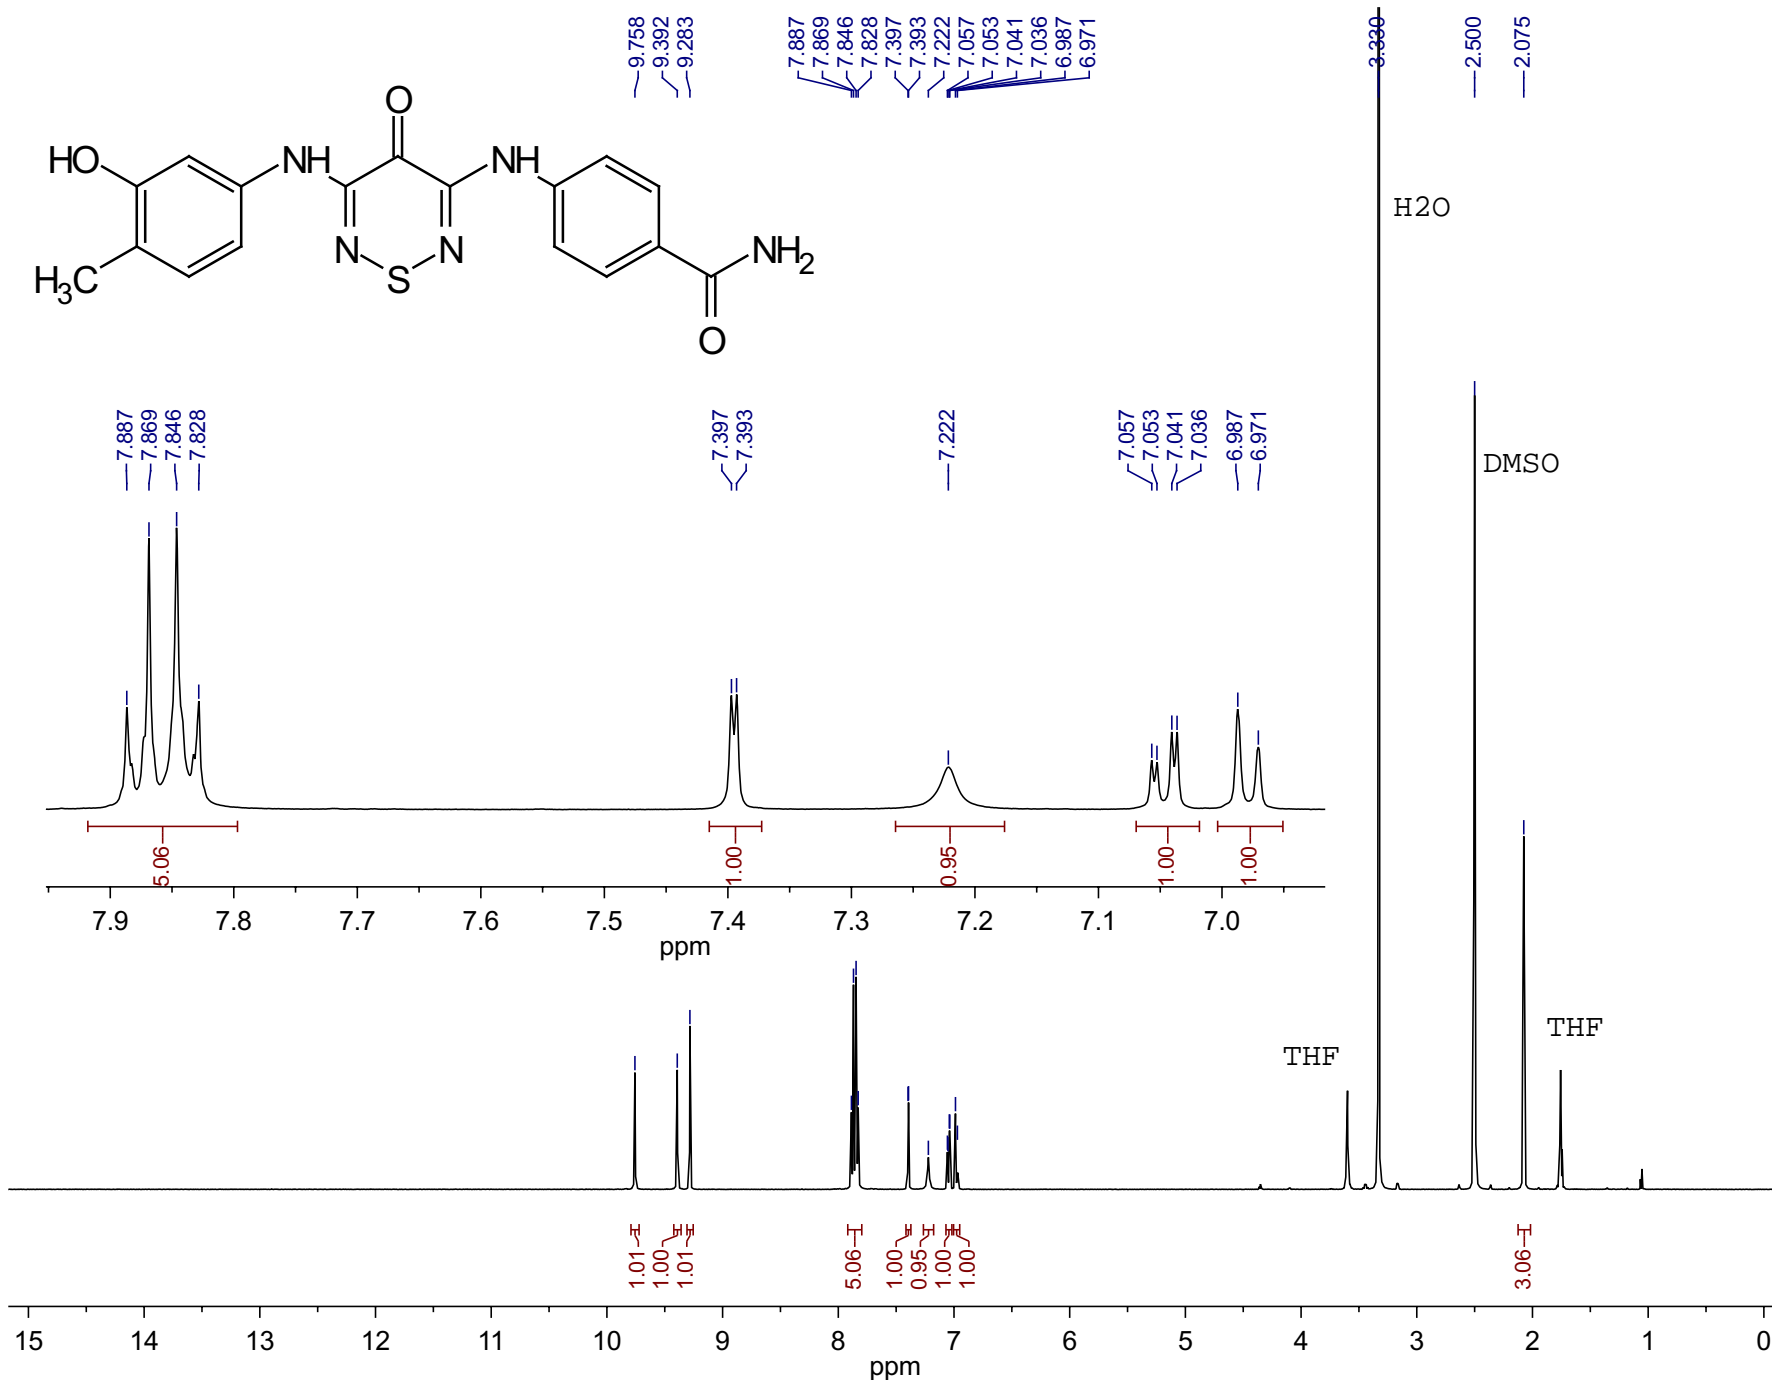

Current Data Parameters

NAME Kalogirou  
EXPNO 86  
PROCNO 1

F2 - Acquisition Parameters

Date\_ 20160604  
Time 17.18  
INSTRUM spect  
PROBHD 5 mm PABBO BB-  
PULPROG zg30  
TD 65536  
SOLVENT DMSO  
NS 16  
DS 2  
SWH 10000.000 Hz  
FIDRES 0.152588 Hz  
AQ 3.2767999 sec  
RG 144  
DW 50.000 usec  
DE 6.50 usec  
TE 296.9 K  
D1 1.00000000 sec  
TD0 1

CHANNEL f1

SFO1 500.0361158 MHz  
NUC1 1H  
P1 12.00 usec  
PLW1 14.50000000 W

F2 - Processing parameters

SI 65536  
SF 500.0330316 MHz  
WDW EM  
SSB 0  
LB 0.30 Hz  
GB 0  
PC 1.00

<sup>13</sup>C-NMR of 4-((5-((3-hydroxy-4-methylphenyl)amino)-4-oxo-4H-1,2,6-thiadiazin-3-yl)amino)-benzamide (2)

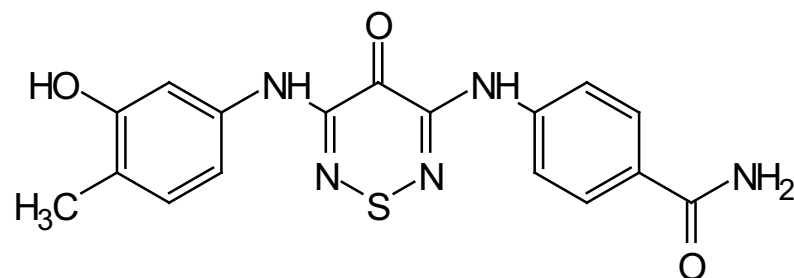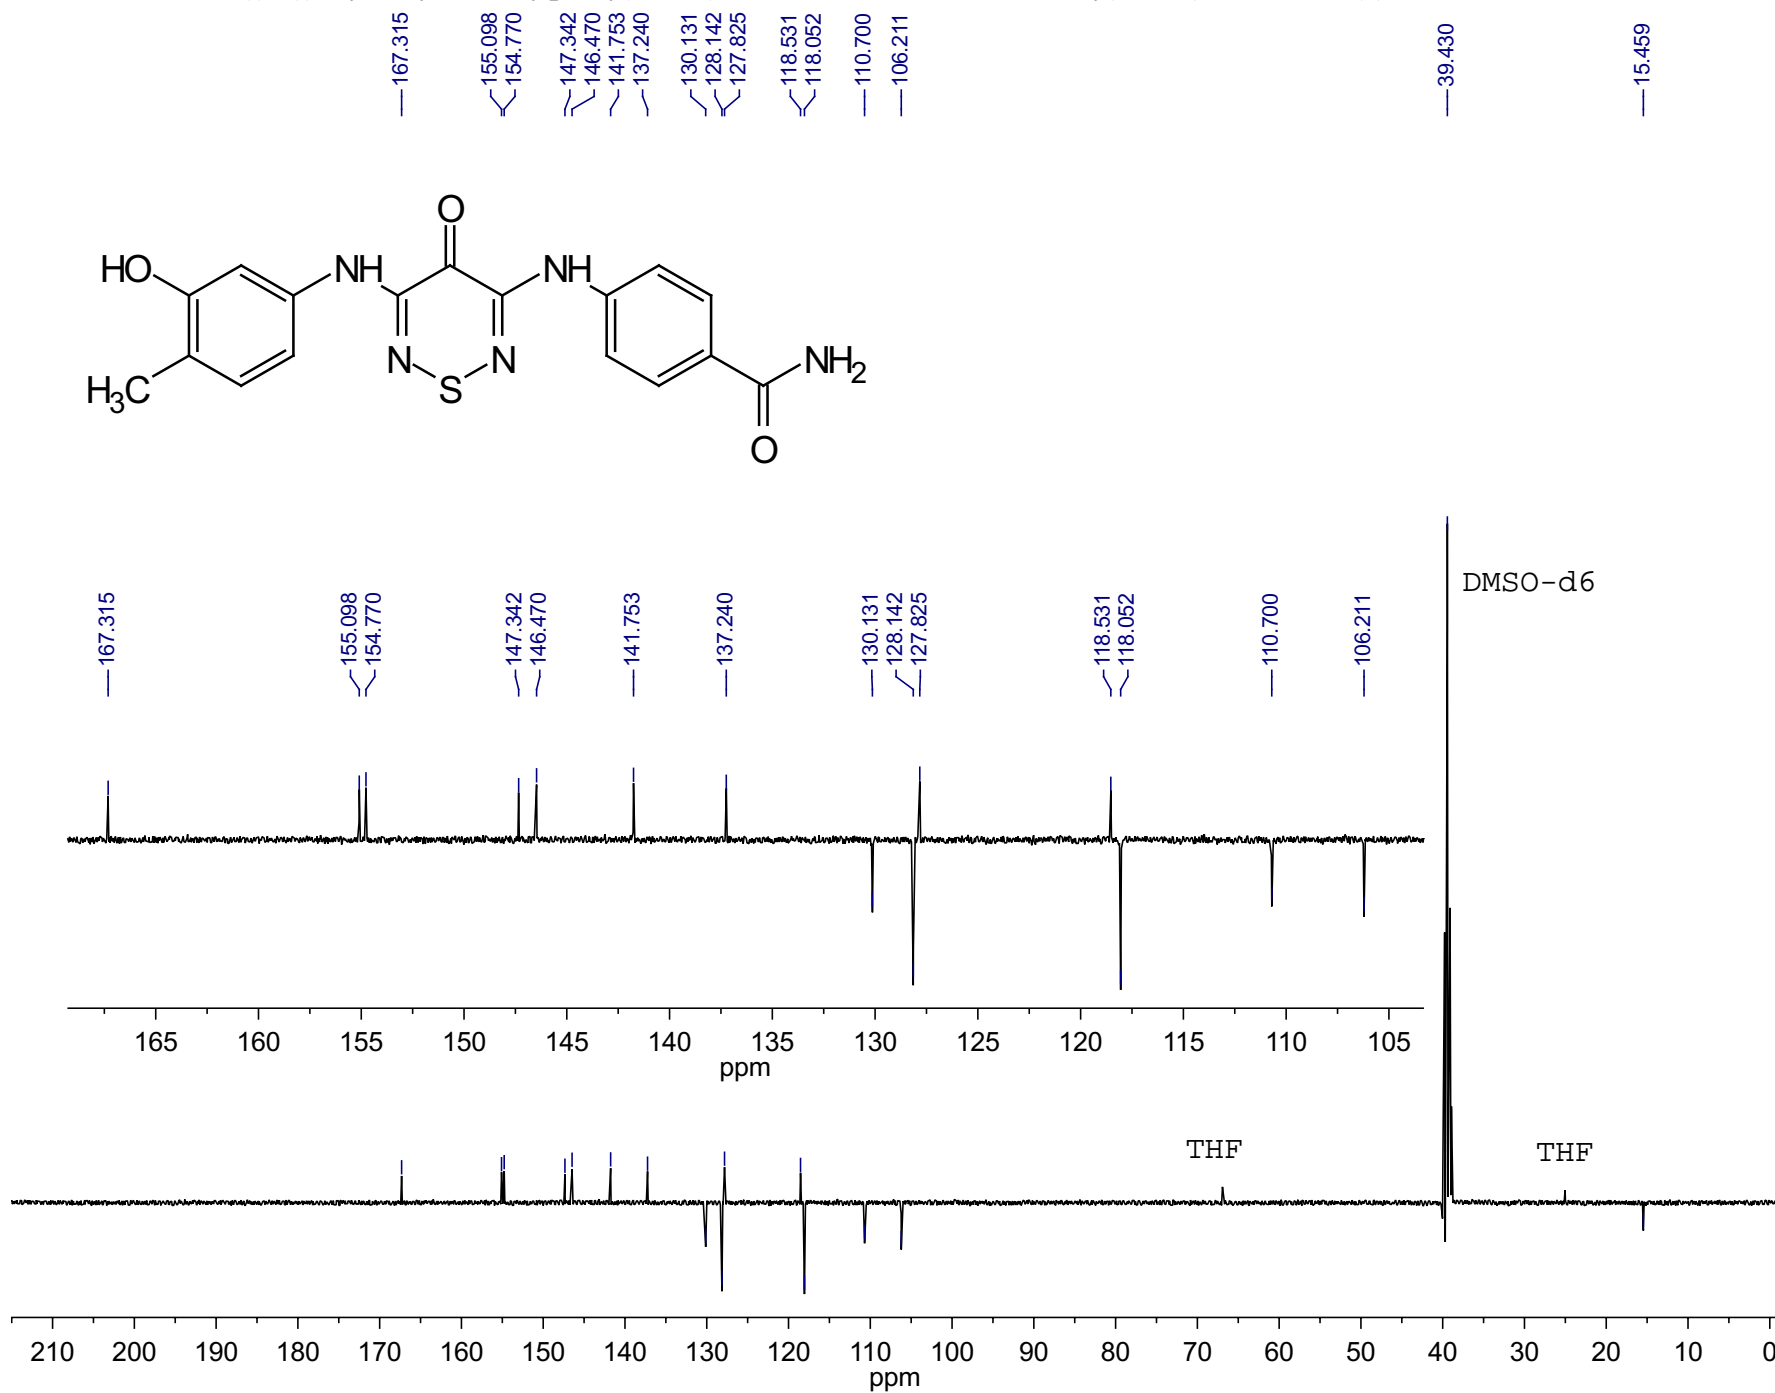

Current Data Parameters

|                             |                 |
|-----------------------------|-----------------|
| NAME                        | Kalogirou       |
| EXPNO                       | 87              |
| PROCNO                      | 1               |
| F2 - Acquisition Parameters |                 |
| Date_                       | 20160604        |
| Time                        | 17.36           |
| INSTRUM                     | spect           |
| PROBHD                      | 5 mm PABBO BB-  |
| PULPROG                     | jmod            |
| TD                          | 65536           |
| SOLVENT                     | DMSO            |
| NS                          | 3072            |
| DS                          | 4               |
| SWH                         | 29761.904 Hz    |
| FIDRES                      | 0.454131 Hz     |
| AQ                          | 1.1010048 sec   |
| RG                          | 2050            |
| DW                          | 16.800 usec     |
| DE                          | 6.50 usec       |
| TE                          | 297.8 K         |
| CNST2                       | 145.000000      |
| CNST11                      | 1.000000        |
| D1                          | 2.0000000 sec   |
| D20                         | 0.00689655 sec  |
| TD0                         | 1               |
| ===== CHANNEL f1 =====      |                 |
| SFO1                        | 125.7459782 MHz |
| NUC1                        | <sup>13</sup> C |
| P1                          | 9.00 usec       |
| P2                          | 18.00 usec      |
| PLW1                        | 133.0000000 W   |
| ===== CHANNEL f2 =====      |                 |
| SFO2                        | 500.0350280 MHz |
| NUC2                        | <sup>1</sup> H  |
| CPDPRG2                     | waltz16         |
| PCPD2                       | 80.00 usec      |
| PLW2                        | 14.5000000 W    |
| PLW12                       | 0.32624999 W    |
| F2 - Processing parameters  |                 |
| SI                          | 32768           |
| SF                          | 125.7334644 MHz |
| WDW                         | EM              |
| SSB                         | 0               |
| LB                          | 1.00 Hz         |
| GB                          | 0               |
| PC                          | 1.40            |



<sup>1</sup>H-NMR of 3-((2,2-dioxido-1,3-dihydrobenzo[c]thiophen-5-yl)amino)-5-((3-hydroxy-4-methyl-phenyl) amino)-4*H*-1,2,6-thiadiazin-4-one (3)

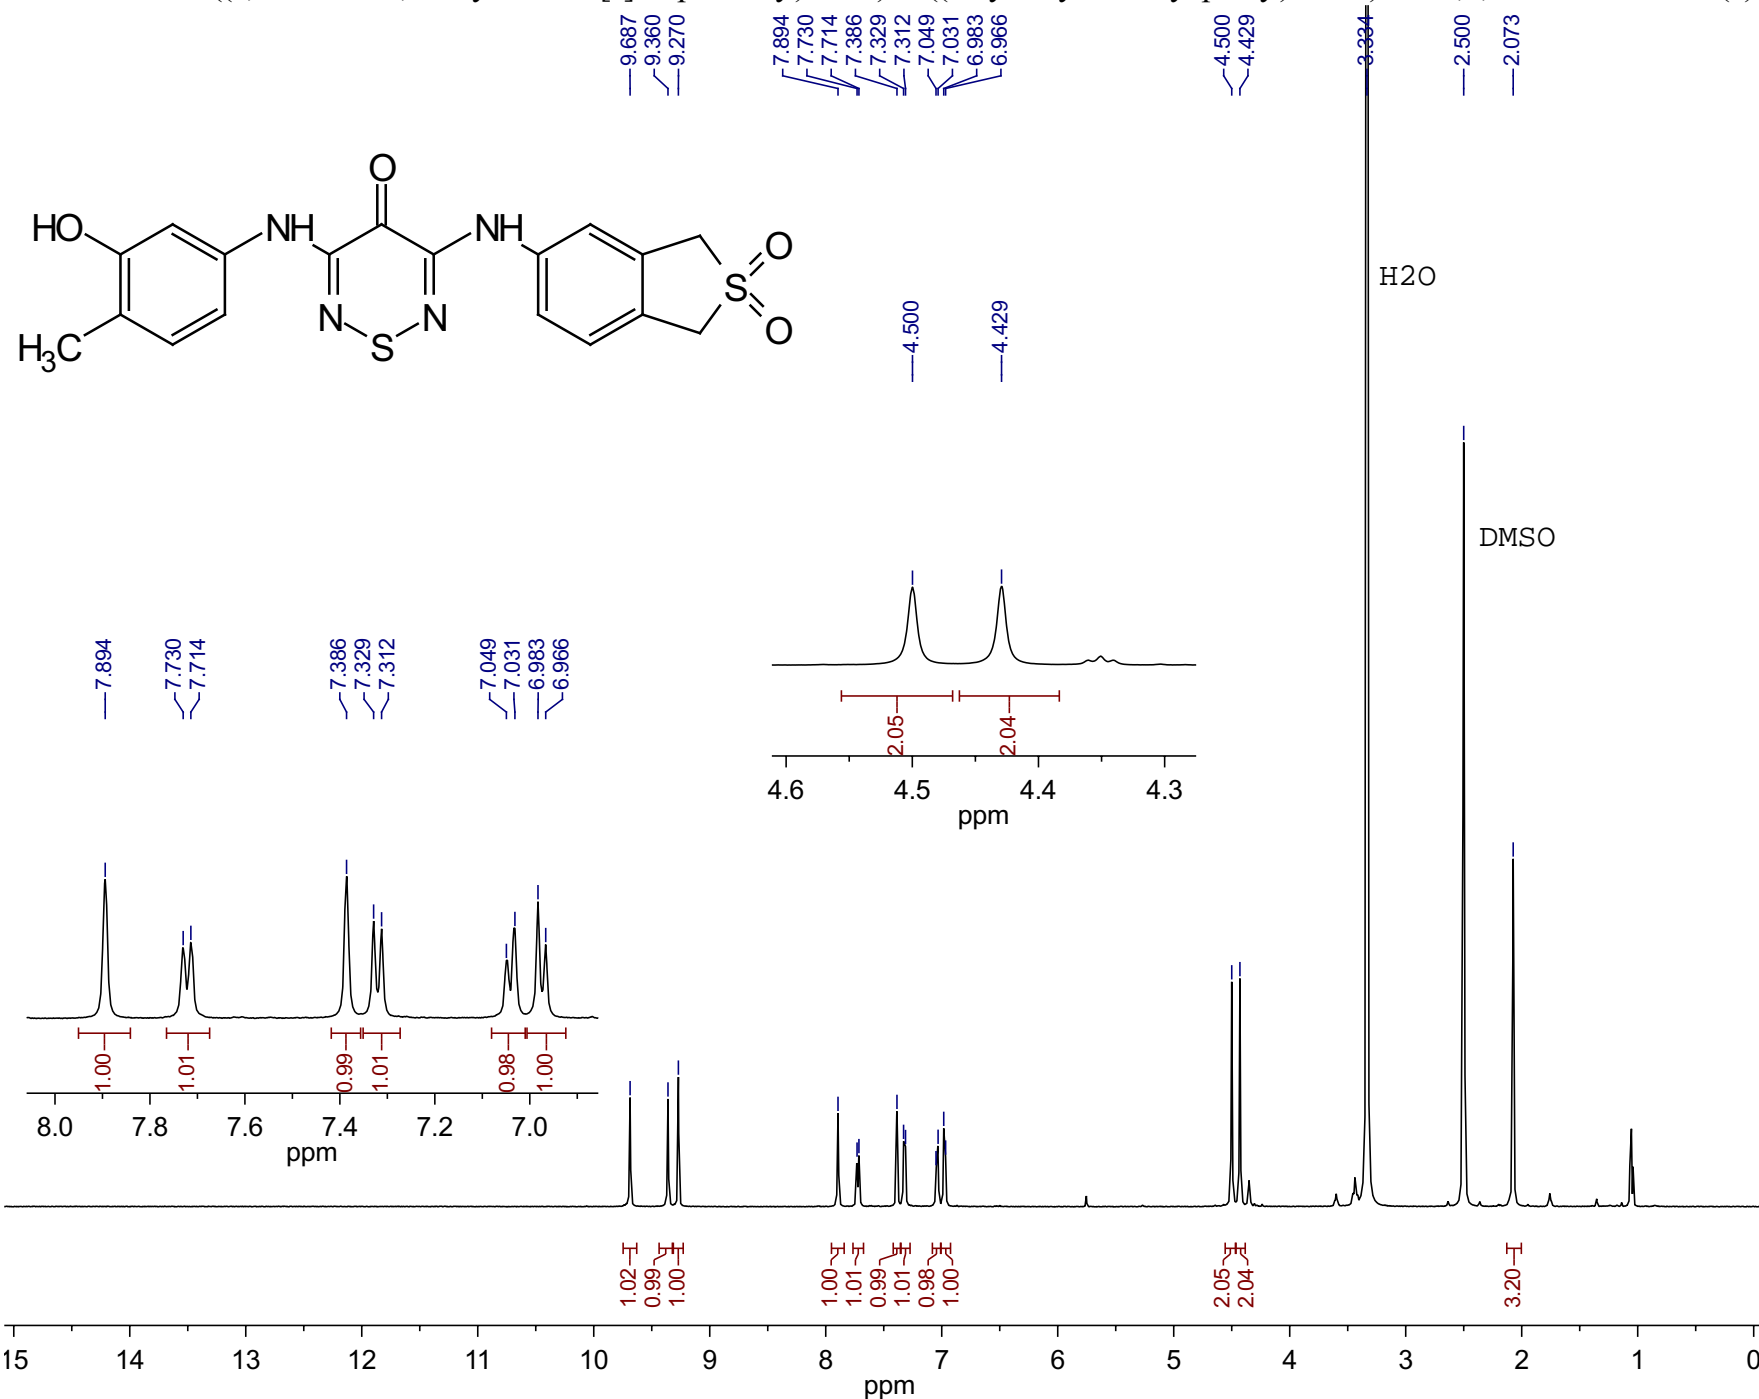

Current Data Parameters  
NAME Kalogirou  
EXPNO 53  
PROCNO 1

F2 - Acquisition Parameters  
Date\_ 20160524  
Time 16.33  
INSTRUM spect  
PROBHD 5 mmPABBO BB-  
PULPROG zg30  
TD 65536  
SOLVENT DMSO  
NS 16  
DS 2  
SWH 10000.000 Hz  
FIDRES 0.152588 Hz  
AQ 3.2767999 sec  
RG 128  
DW 50.000 usec  
DE 6.50 usec  
TE 297.8 K  
D1 1.00000000 sec  
TD0 1

CHANNEL f1  
SFO1 500.0361158 MHz  
NUC1 1H  
P1 12.00 usec  
PLW1 14.50000000 W

F2 - Processing parameters  
SI 65536  
SF 500.0330321 MHz  
WDW EM  
SSB 0  
LB 0.30 Hz  
GB 0  
PC 1.00

<sup>13</sup>C-NMR of 3-((2,2-dioxido-1,3-dihydrobenzo[*c*]thiophen-5-yl)amino)-5-((3-hydroxy-4-methyl-phenyl) amino)-4*H*-1,2,6-thiadiazin-4-one (3)

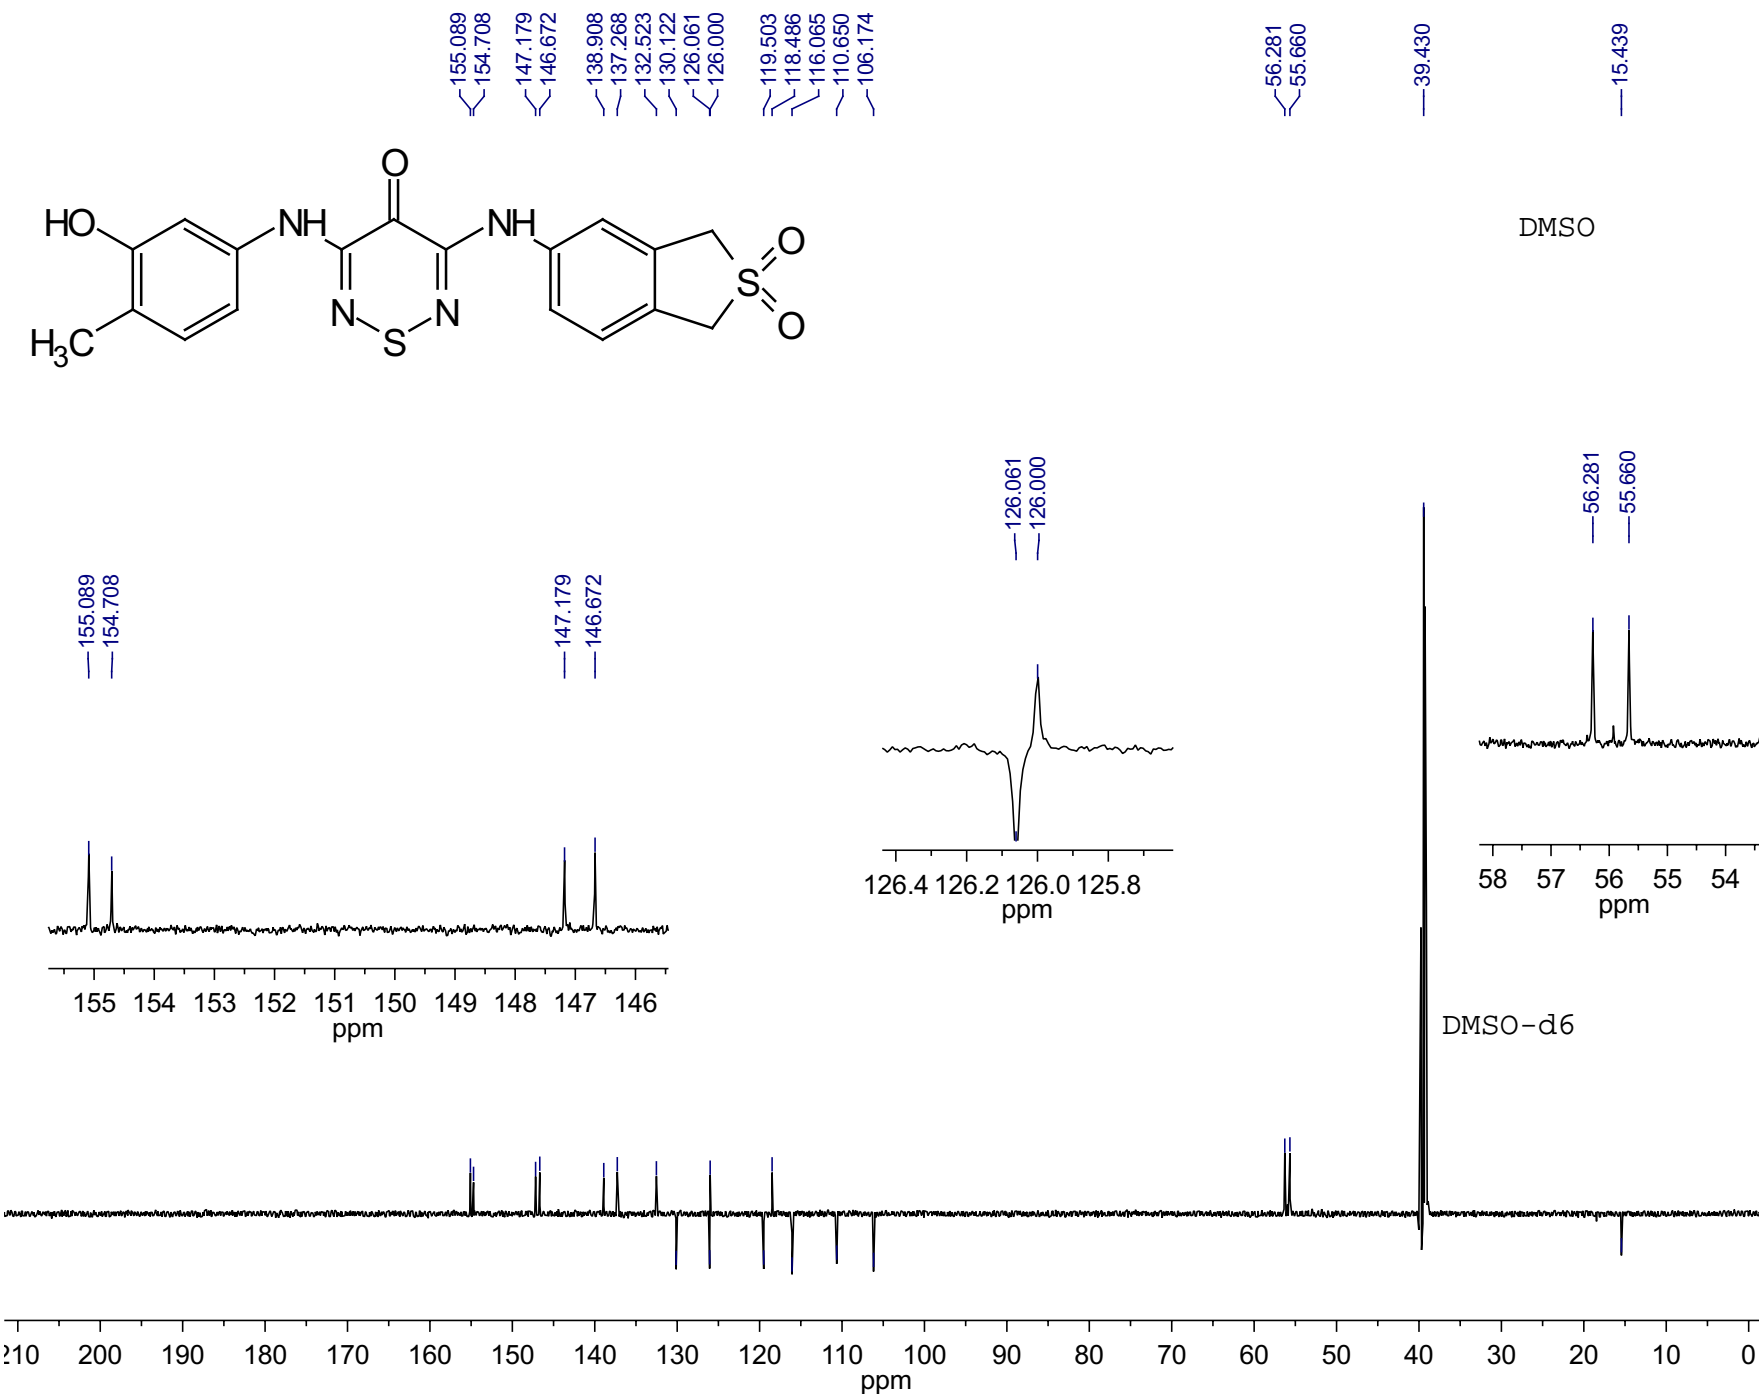

Current Data Parameters

|                             |                 |
|-----------------------------|-----------------|
| NAME                        | Kalogirou       |
| EXPNO                       | 54              |
| PROCNO                      | 1               |
| F2 - Acquisition Parameters |                 |
| Date_                       | 20160524        |
| Time                        | 19.16           |
| INSTRUM                     | spect           |
| PROBHD                      | 5 mm PABBO BB-  |
| PULPROG                     | jmod            |
| TD                          | 65536           |
| SOLVENT                     | DMSO            |
| NS                          | 3072            |
| DS                          | 4               |
| SWH                         | 29761.904 Hz    |
| FIDRES                      | 0.454131 Hz     |
| AQ                          | 1.1010048 sec   |
| RG                          | 2050            |
| DW                          | 16.800 usec     |
| DE                          | 6.50 usec       |
| TE                          | 298.9 K         |
| CNST2                       | 145.0000000     |
| CNST11                      | 1.0000000       |
| D1                          | 2.00000000 sec  |
| D20                         | 0.00689655 sec  |
| TD0                         | 1               |
| ===== CHANNEL f1 =====      |                 |
| SFO1                        | 125.7459782 MHz |
| NUC1                        | <sup>13</sup> C |
| P1                          | 9.00 usec       |
| P2                          | 18.00 usec      |
| PLW1                        | 133.00000000 W  |
| ===== CHANNEL f2 =====      |                 |
| SFO2                        | 500.0350280 MHz |
| NUC2                        | <sup>1</sup> H  |
| CPDPRG[2]                   | waltz16         |
| PCPD2                       | 80.00 usec      |
| PLW2                        | 14.50000000 W   |
| PLW12                       | 0.32624999 W    |
| F2 - Processing parameters  |                 |
| SI                          | 32768           |
| SF                          | 125.7334652 MHz |
| WDW                         | EM              |
| SSB                         | 0               |
| LB                          | 1.00 Hz         |
| GB                          | 0               |
| PC                          | 1.40            |

<sup>1</sup>H-NMR of *N*-methyl-2-((5-((3-((methylsulfonyl)methyl)phenyl)amino)-4-oxo-4*H*-1,2,6-thiadiazin-3-yl)-amino)benzamide (4)

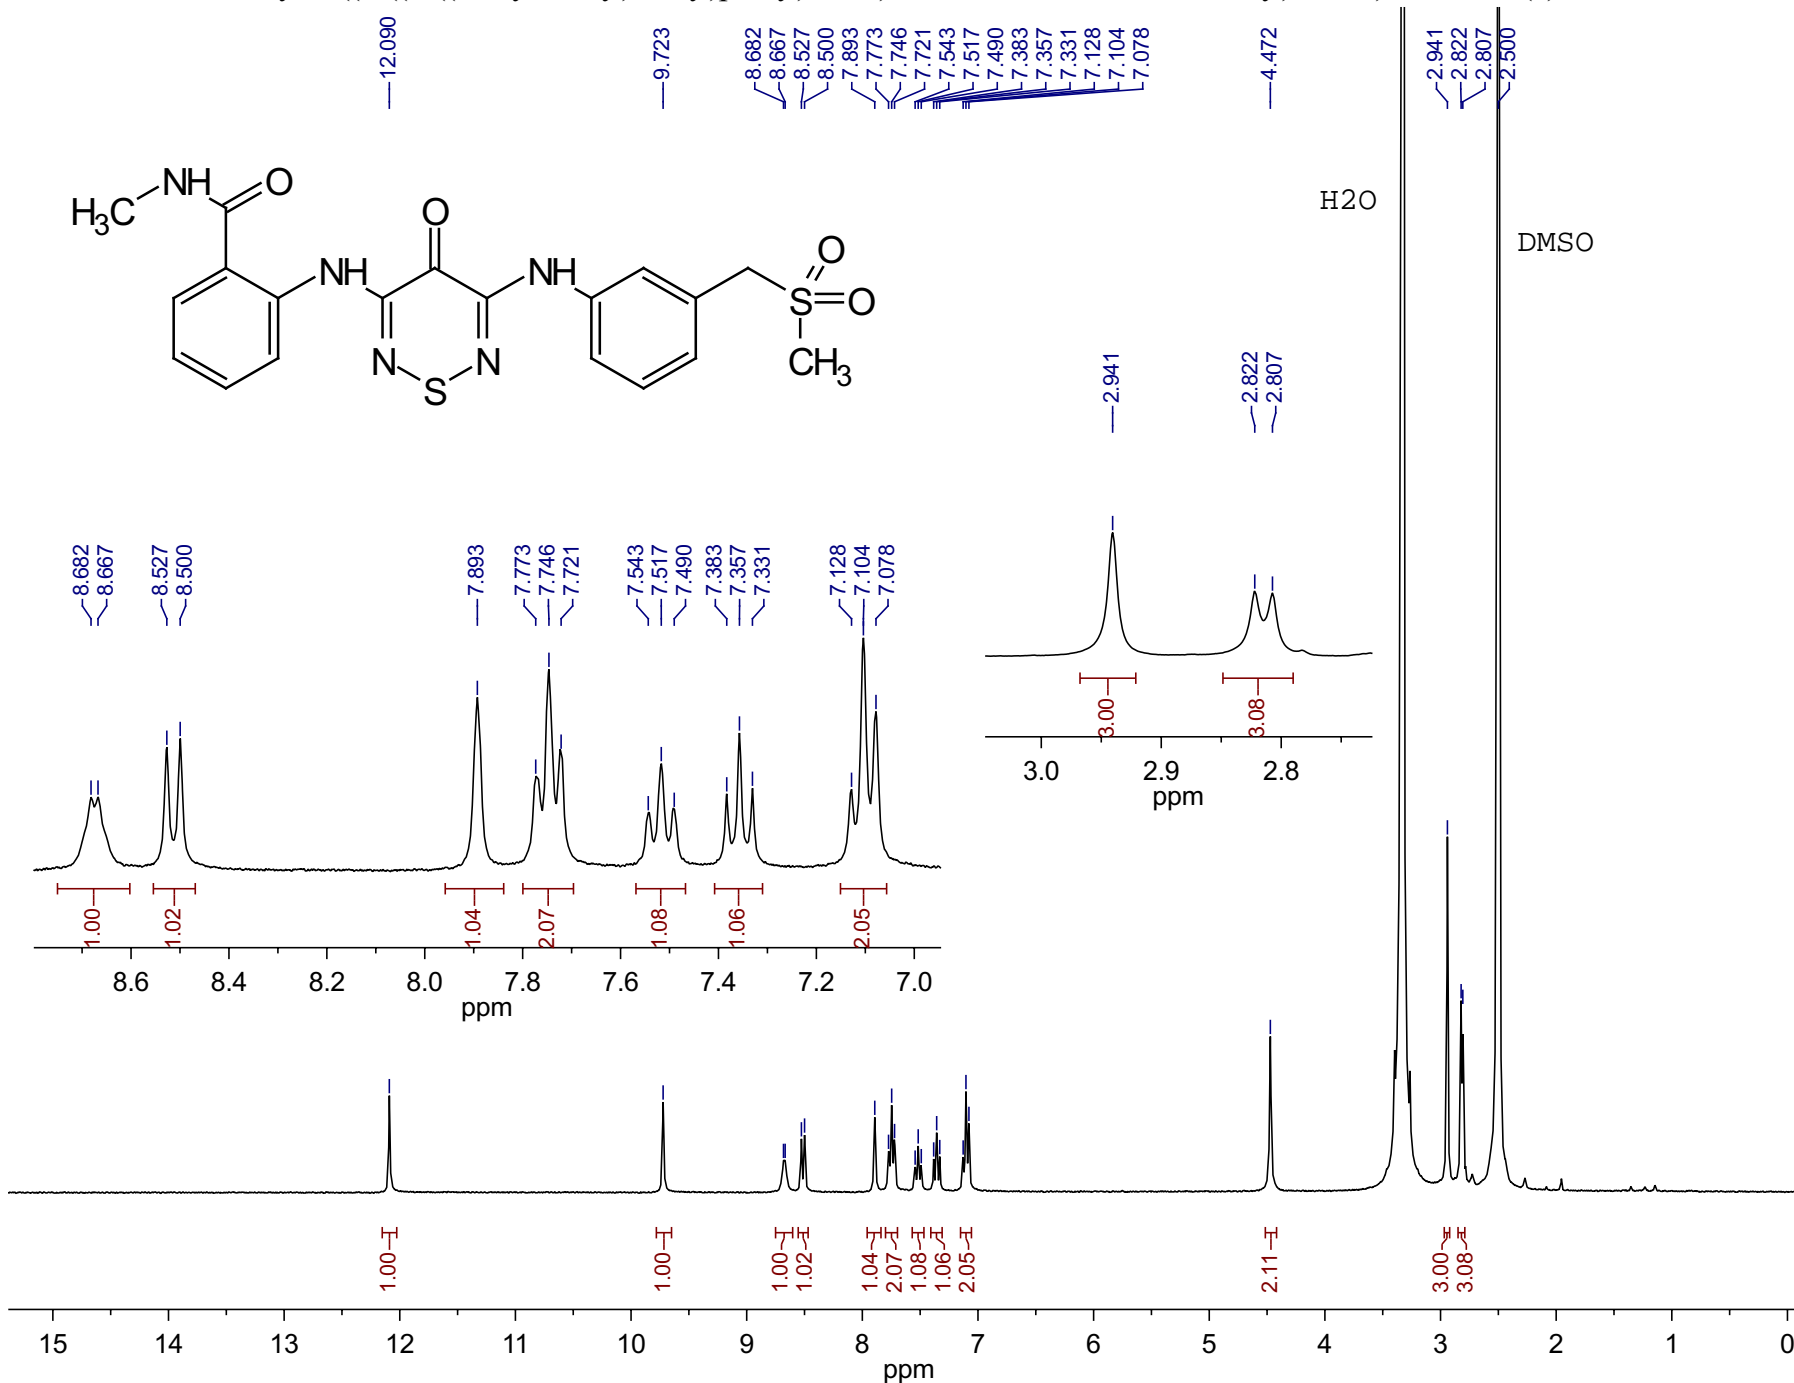

Current Data Parameters  
NAME Andreas  
EXPNO 114  
PROCNO 1

F2 - Acquisition Parameters  
Date\_ 20180414  
Time 18.24 h  
INSTRUM spect  
PROBHD Z104275\_0375 (Z104275)  
PULPROG zg30  
TD 65536  
SOLVENT DMSO  
NS 128  
DS 2  
SWH 6009.615 Hz  
FIDRES 0.183399 Hz  
AQ 5.4525952 sec  
RG 201.81  
DW 83.200 usec  
DE 6.50 usec  
TE 298.1 K  
D1 1.00000000 sec  
TD0 1  
SFO1 300.1318533 MHz  
NUC1 1H  
P1 14.00 usec  
PLW1 7.50000000 W

F2 - Processing parameters  
SI 65536  
SF 300.1300024 MHz  
WDW EM  
SSB 0  
LB 0.30 Hz  
GB 0  
PC 1.00

<sup>13</sup>C-NMR of *N*-methyl-2-((5-((3-((methylsulfonyl)methyl)phenyl)amino)-4-oxo-4*H*-1,2,6-thiadiazin-3-yl)-amino)benzamide (**4**)

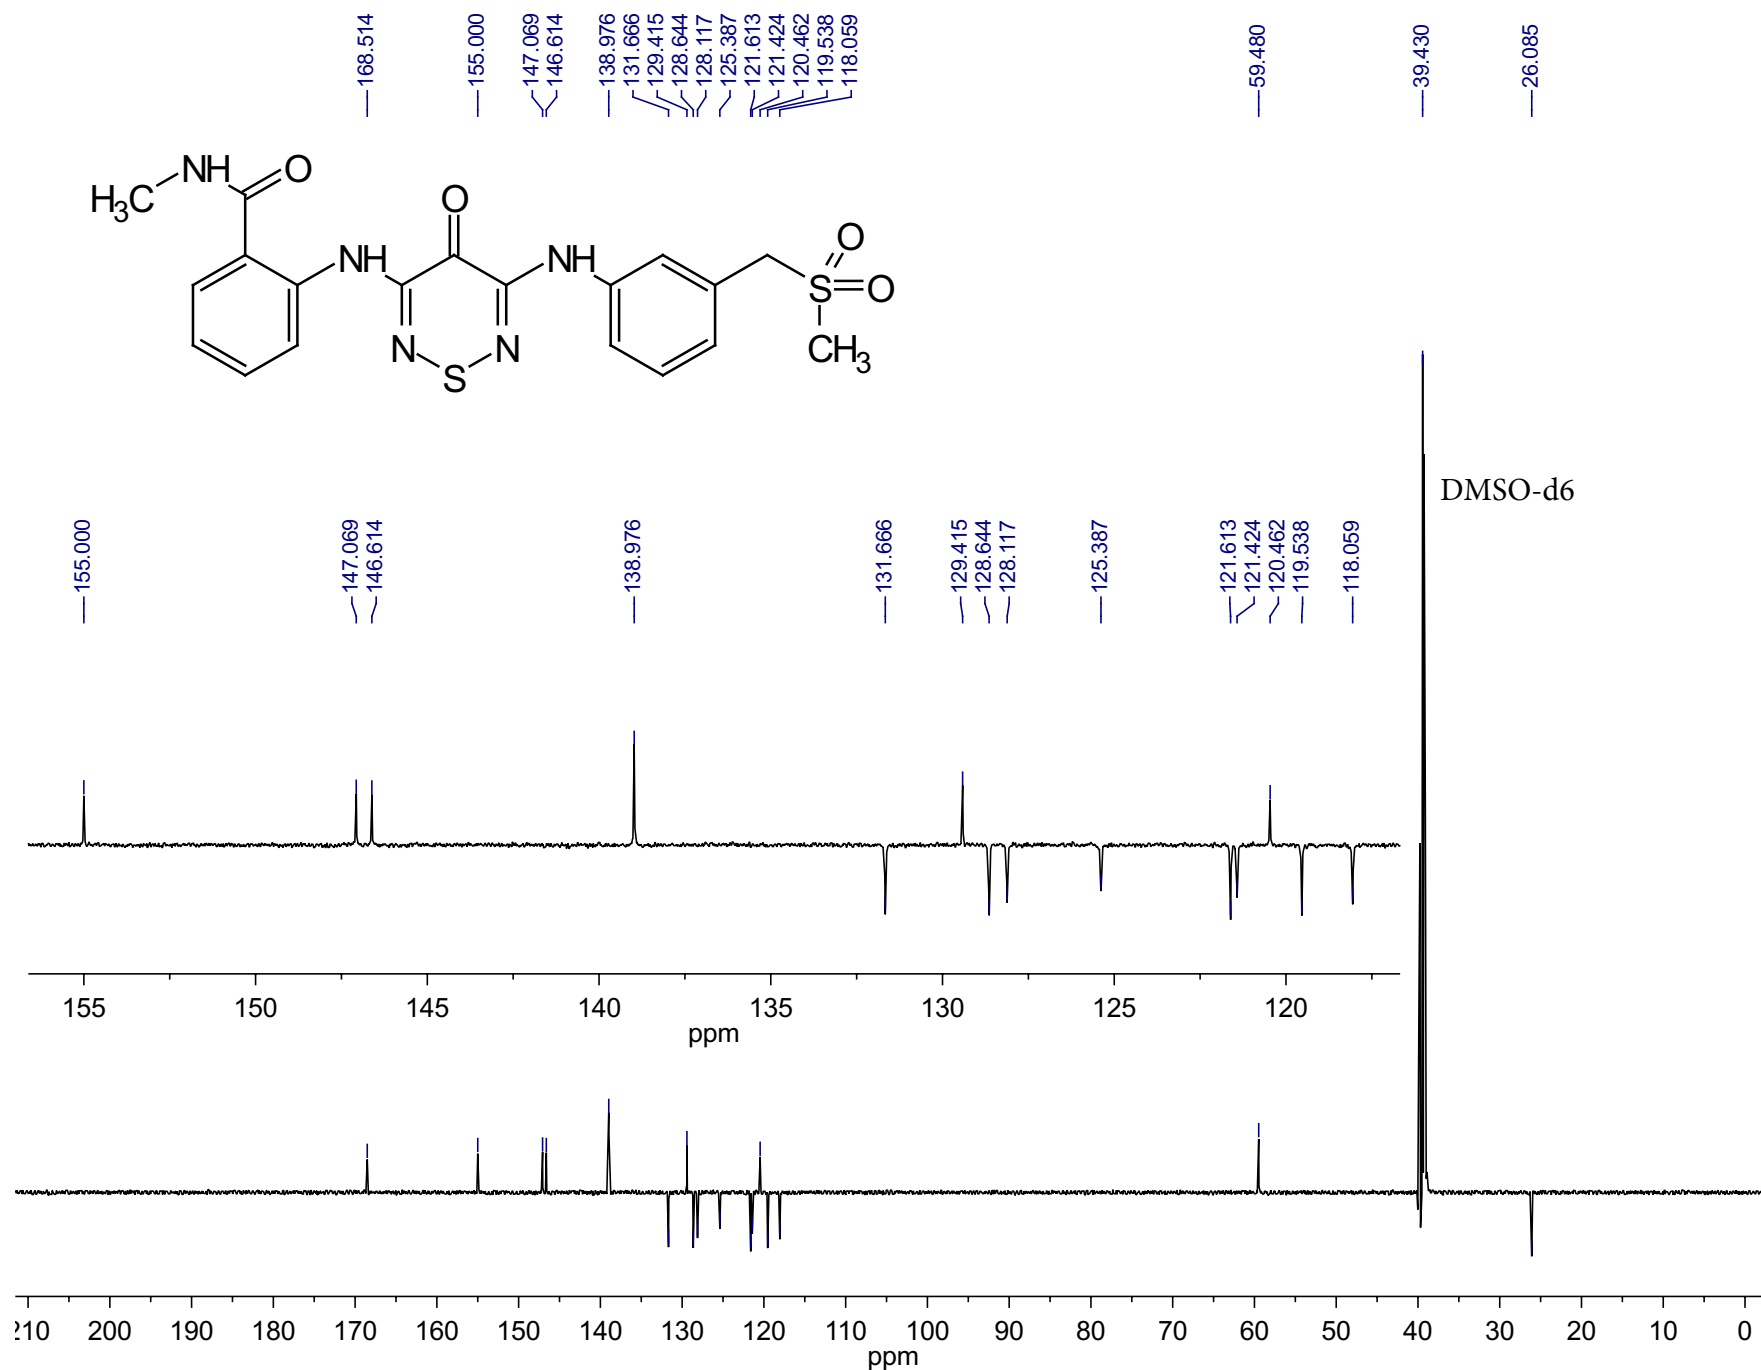

Current Data Parameters

|                             |                 |
|-----------------------------|-----------------|
| NAME                        | Kalogirou       |
| EXPNO                       | 56              |
| PROCNO                      | 1               |
| F2 - Acquisition Parameters |                 |
| Date_                       | 20160525        |
| Time                        | 5.16            |
| INSTRUM                     | spect           |
| PROBHD                      | 5 mm PABBO BB-  |
| PULPROG                     | jmod            |
| TD                          | 65536           |
| SOLVENT                     | DMSO            |
| NS                          | 10240           |
| DS                          | 4               |
| SWH                         | 29761.904 Hz    |
| FIDRES                      | 0.454131 Hz     |
| AQ                          | 1.1010048 sec   |
| RG                          | 2050            |
| DW                          | 16.800 usec     |
| DE                          | 6.50 usec       |
| TE                          | 299.2 K         |
| CNST2                       | 145.0000000     |
| CNST11                      | 1.0000000       |
| D1                          | 2.00000000 sec  |
| D20                         | 0.00689655 sec  |
| TD0                         | 1               |
| ===== CHANNEL f1 =====      |                 |
| SFO1                        | 125.7459782 MHz |
| NUC1                        | <sup>13</sup> C |
| P1                          | 9.00 usec       |
| P2                          | 18.00 usec      |
| PLW1                        | 133.00000000 W  |
| ===== CHANNEL f2 =====      |                 |
| SFO2                        | 500.0350280 MHz |
| NUC2                        | <sup>1</sup> H  |
| CPDPRG[2]                   | waltz16         |
| PCPD2                       | 80.00 usec      |
| PLW2                        | 14.50000000 W   |
| PLW12                       | 0.32624999 W    |
| F2 - Processing parameters  |                 |
| SI                          | 32768           |
| SF                          | 125.7334672 MHz |
| WDW                         | EM              |
| SSB                         | 0               |
| LB                          | 1.00 Hz         |
| GB                          | 0               |
| PC                          | 1.40            |

<sup>1</sup>H-NMR of *N*-methyl-2-((5-((4-morpholinophenyl)amino)-4-oxo-4*H*-1,2,6-thiadiazin-3-yl)amino)- benzamide (**5**)

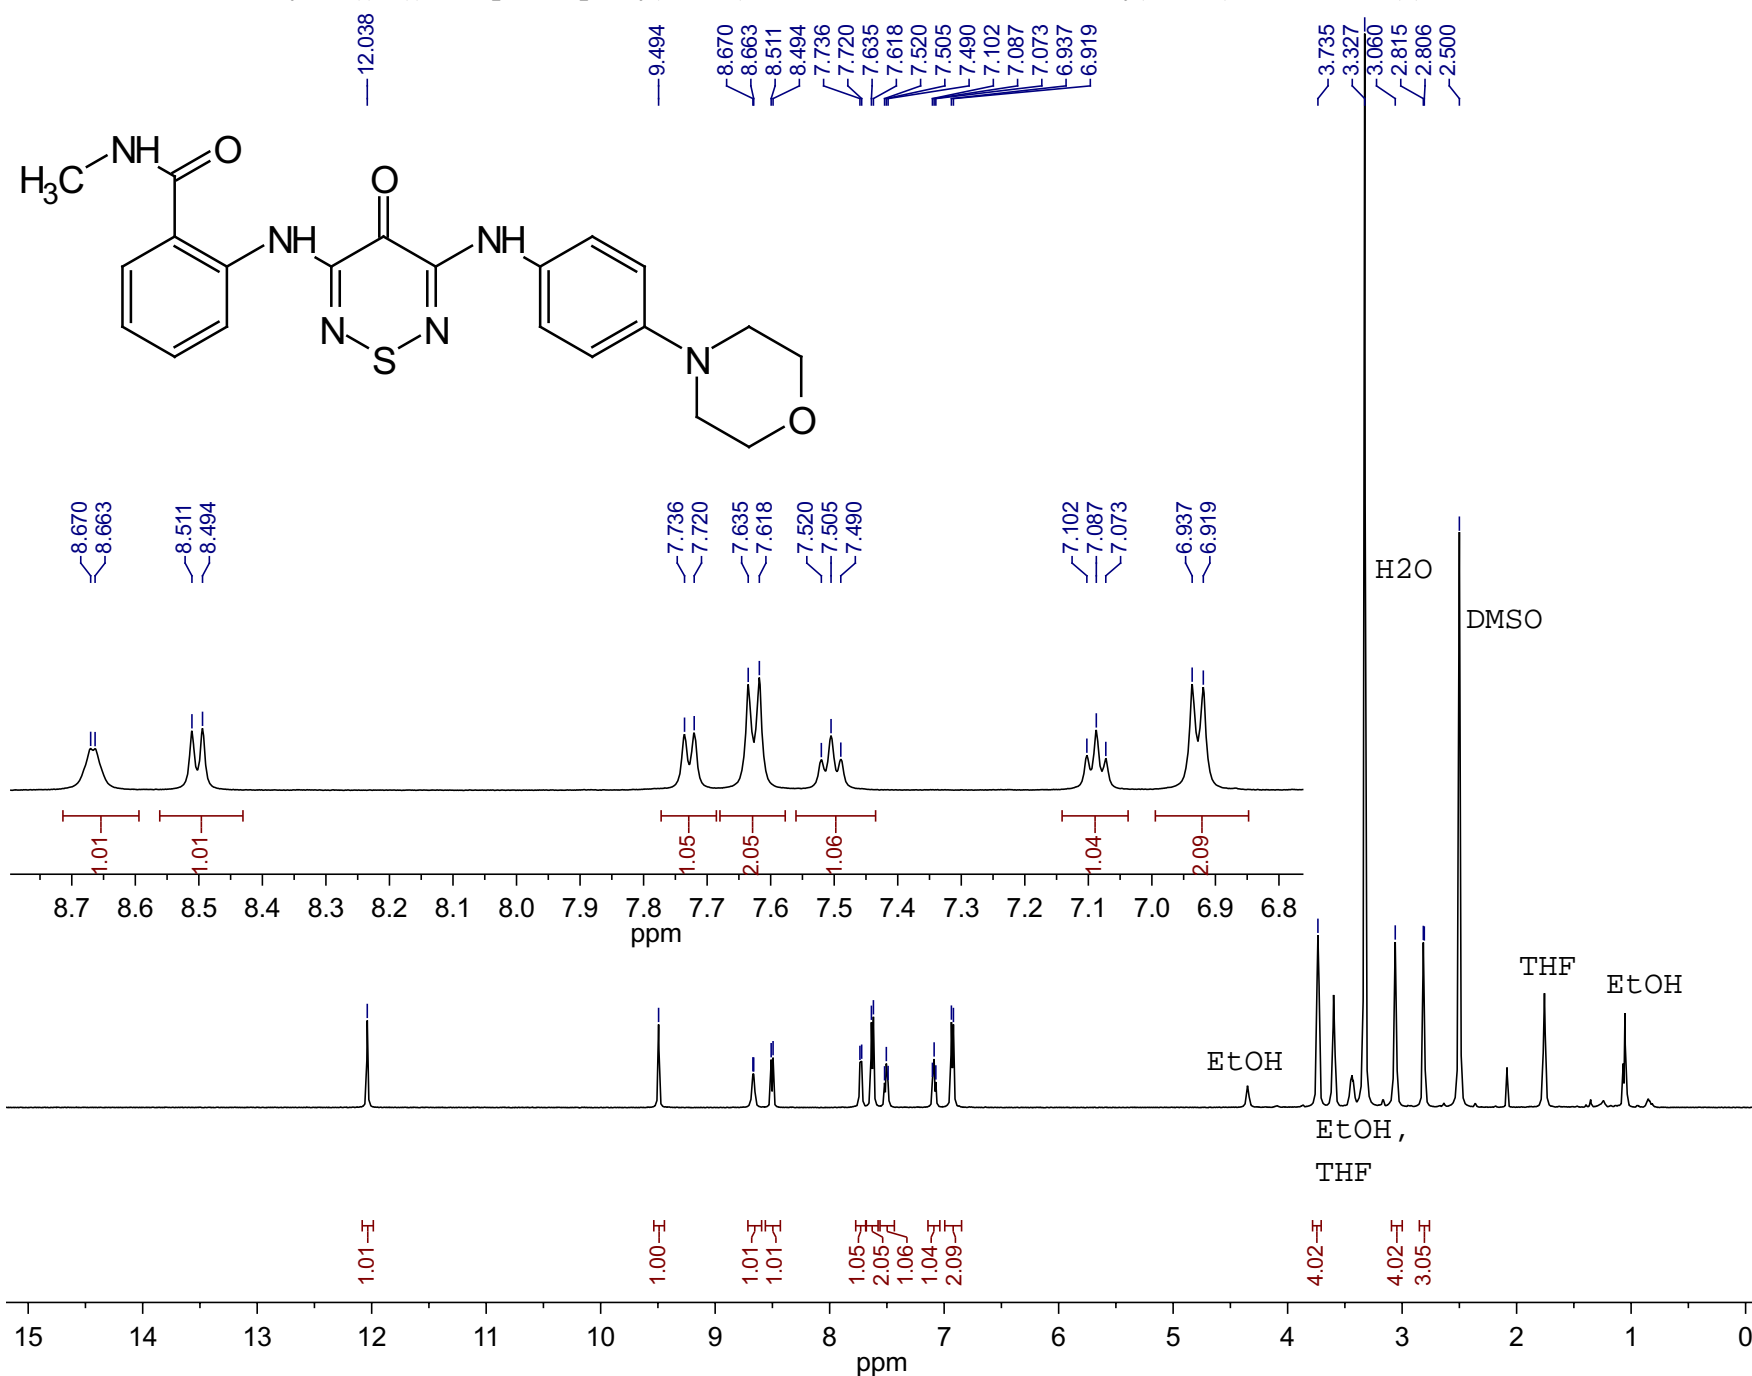

Current Data Parameters

NAME Kalogirou  
EXPNO 62  
PROCNO 1

F2 - Acquisition Parameters

Date\_ 20160526  
Time 13.29  
INSTRUM spect  
PROBHD 5 mm PABBO BB-  
PULPROG zg30  
TD 65536  
SOLVENT DMSO  
NS 16  
DS 2  
SWH 10000.000 Hz  
FIDRES 0.152588 Hz  
AQ 3.2767999 sec  
RG 128  
DW 50.000 usec  
DE 6.50 usec  
TE 297.8 K  
D1 1.0000000 sec  
TD0 1

CHANNEL f1

SFO1 500.0361158 MHz  
NUC1 1H  
P1 12.00 usec  
PLW1 14.50000000 W

F2 - Processing parameters

SI 65536  
SF 500.0330323 MHz  
WDW EM  
SSB 0  
LB 0.30 Hz  
GB 0  
PC 1.00

<sup>13</sup>C-NMR of *N*-methyl-2-((5-((4-morpholinophenyl)amino)-4-oxo-4*H*-1,2,6-thiadiazin-3-yl)amino)- benzamide (**5**)

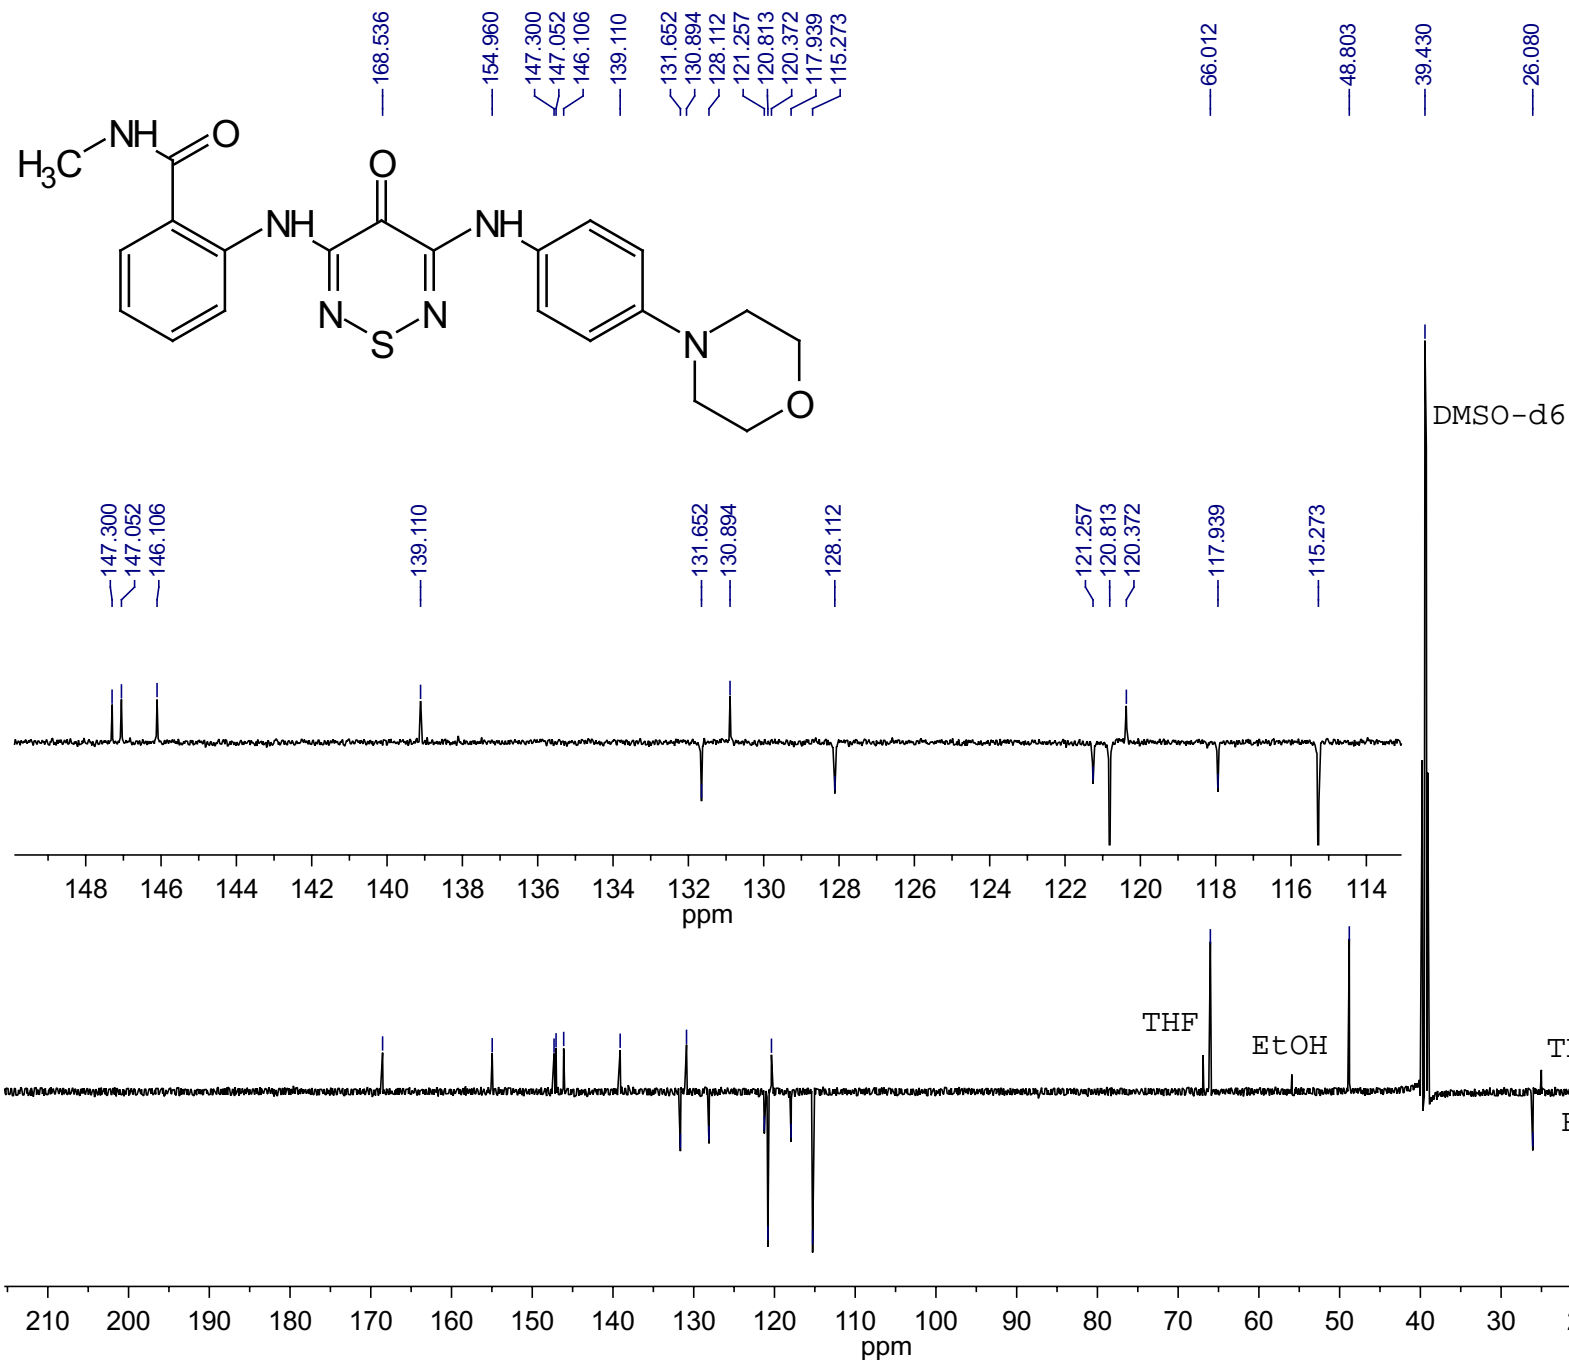

Current Data Parameters

|                             |                 |
|-----------------------------|-----------------|
| NAME                        | Kalogirou       |
| EXPNO                       | 63              |
| PROCNO                      | 1               |
| F2 - Acquisition Parameters |                 |
| Date_                       | 20160526        |
| Time                        | 15.32           |
| INSTRUM                     | spect           |
| PROBHD                      | 5 mm PABBO BB-  |
| PULPROG                     | jmod            |
| TD                          | 65536           |
| SOLVENT                     | DMSO            |
| NS                          | 2666            |
| DS                          | 4               |
| SWH                         | 29761.904 Hz    |
| FIDRES                      | 0.454131 Hz     |
| AQ                          | 1.1010048 sec   |
| RG                          | 2050            |
| DW                          | 16.800 usec     |
| DE                          | 6.50 usec       |
| TE                          | 299.3 K         |
| CNST2                       | 145.0000000     |
| CNST11                      | 1.0000000       |
| D1                          | 2.00000000 sec  |
| D20                         | 0.00689655 sec  |
| TD0                         | 1               |
| ===== CHANNEL f1 =====      |                 |
| SFO1                        | 125.7459782 MHz |
| NUC1                        | <sup>13</sup> C |
| P1                          | 9.00 usec       |
| P2                          | 18.00 usec      |
| PLW1                        | 133.0000000 W   |
| ===== CHANNEL f2 =====      |                 |
| SFO2                        | 500.0350280 MHz |
| NUC2                        | <sup>1</sup> H  |
| CPDPRG2                     | waltz16         |
| PCPD2                       | 80.00 usec      |
| PLW2                        | 14.50000000 W   |
| PLW12                       | 0.32624999 W    |
| F2 - Processing parameters  |                 |
| SI                          | 32768           |
| SF                          | 125.7334666 MHz |
| WDW                         | EM              |
| SSB                         | 0               |
| LB                          | 1.00 Hz         |
| GB                          | 0               |
| PC                          | 1.40            |

<sup>1</sup>H-NMR of 2-((5-((3-hydroxy-4-methylphenyl)amino)-4-oxo-4*H*-1,2,6-thiadiazin-3-yl)amino)-benzamide (**10**)

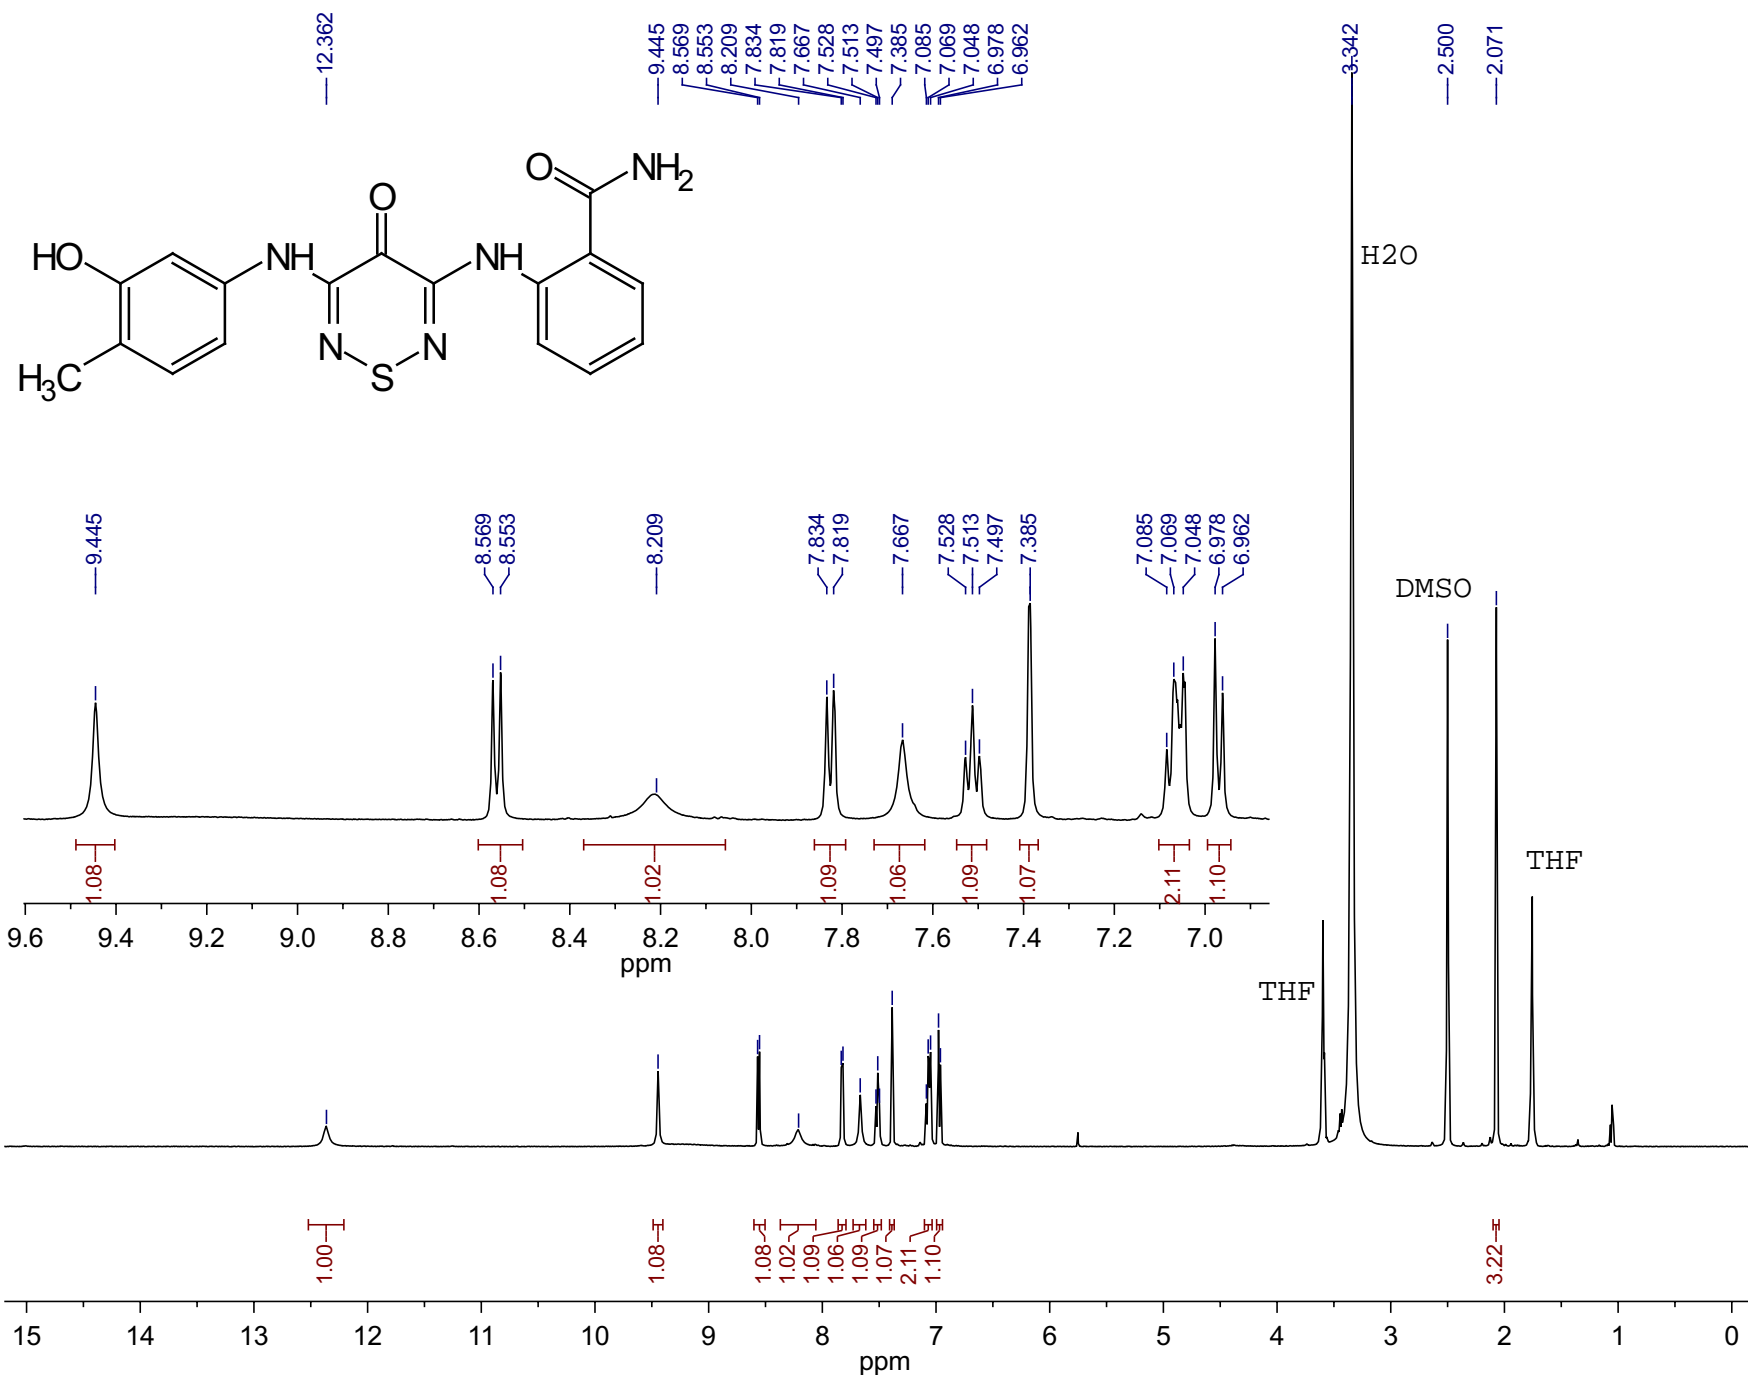

Current Data Parameters

NAME Kalogirou  
EXPNO 344  
PROCNO 1

F2 - Acquisition Parameters

Date\_ 20170627  
Time 23.56  
INSTRUM spect  
PROBHD 5 mm PABBO BB-  
PULPROG zg30  
TD 65536  
SOLVENT DMSO  
NS 16  
DS 2  
SWH 10000.000 Hz  
FIDRES 0.152588 Hz  
AQ 3.2767999 sec  
RG 114  
DW 50.000 usec  
DE 6.50 usec  
TE 297.7 K  
D1 1.00000000 sec  
TD0 1

CHANNEL f1

SFO1 500.0361158 MHz  
NUC1 1H  
P1 12.00 usec  
PLW1 14.50000000 W

F2 - Processing parameters

SI 65536  
SF 500.0330322 MHz  
WDW EM  
SSB 0  
LB 0.30 Hz  
GB 0  
PC 1.00

<sup>13</sup>C-NMR of 2-((5-((3-hydroxy-4-methylphenyl)amino)-4-oxo-4H-1,2,6-thiadiazin-3-yl)amino)-benzamide (10)

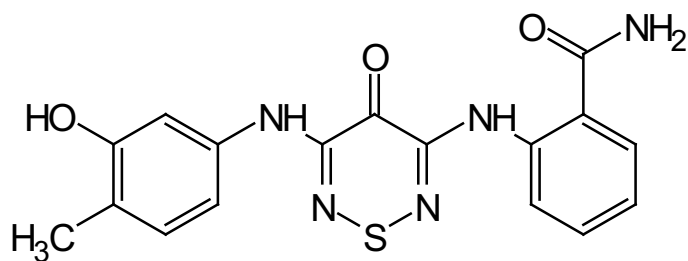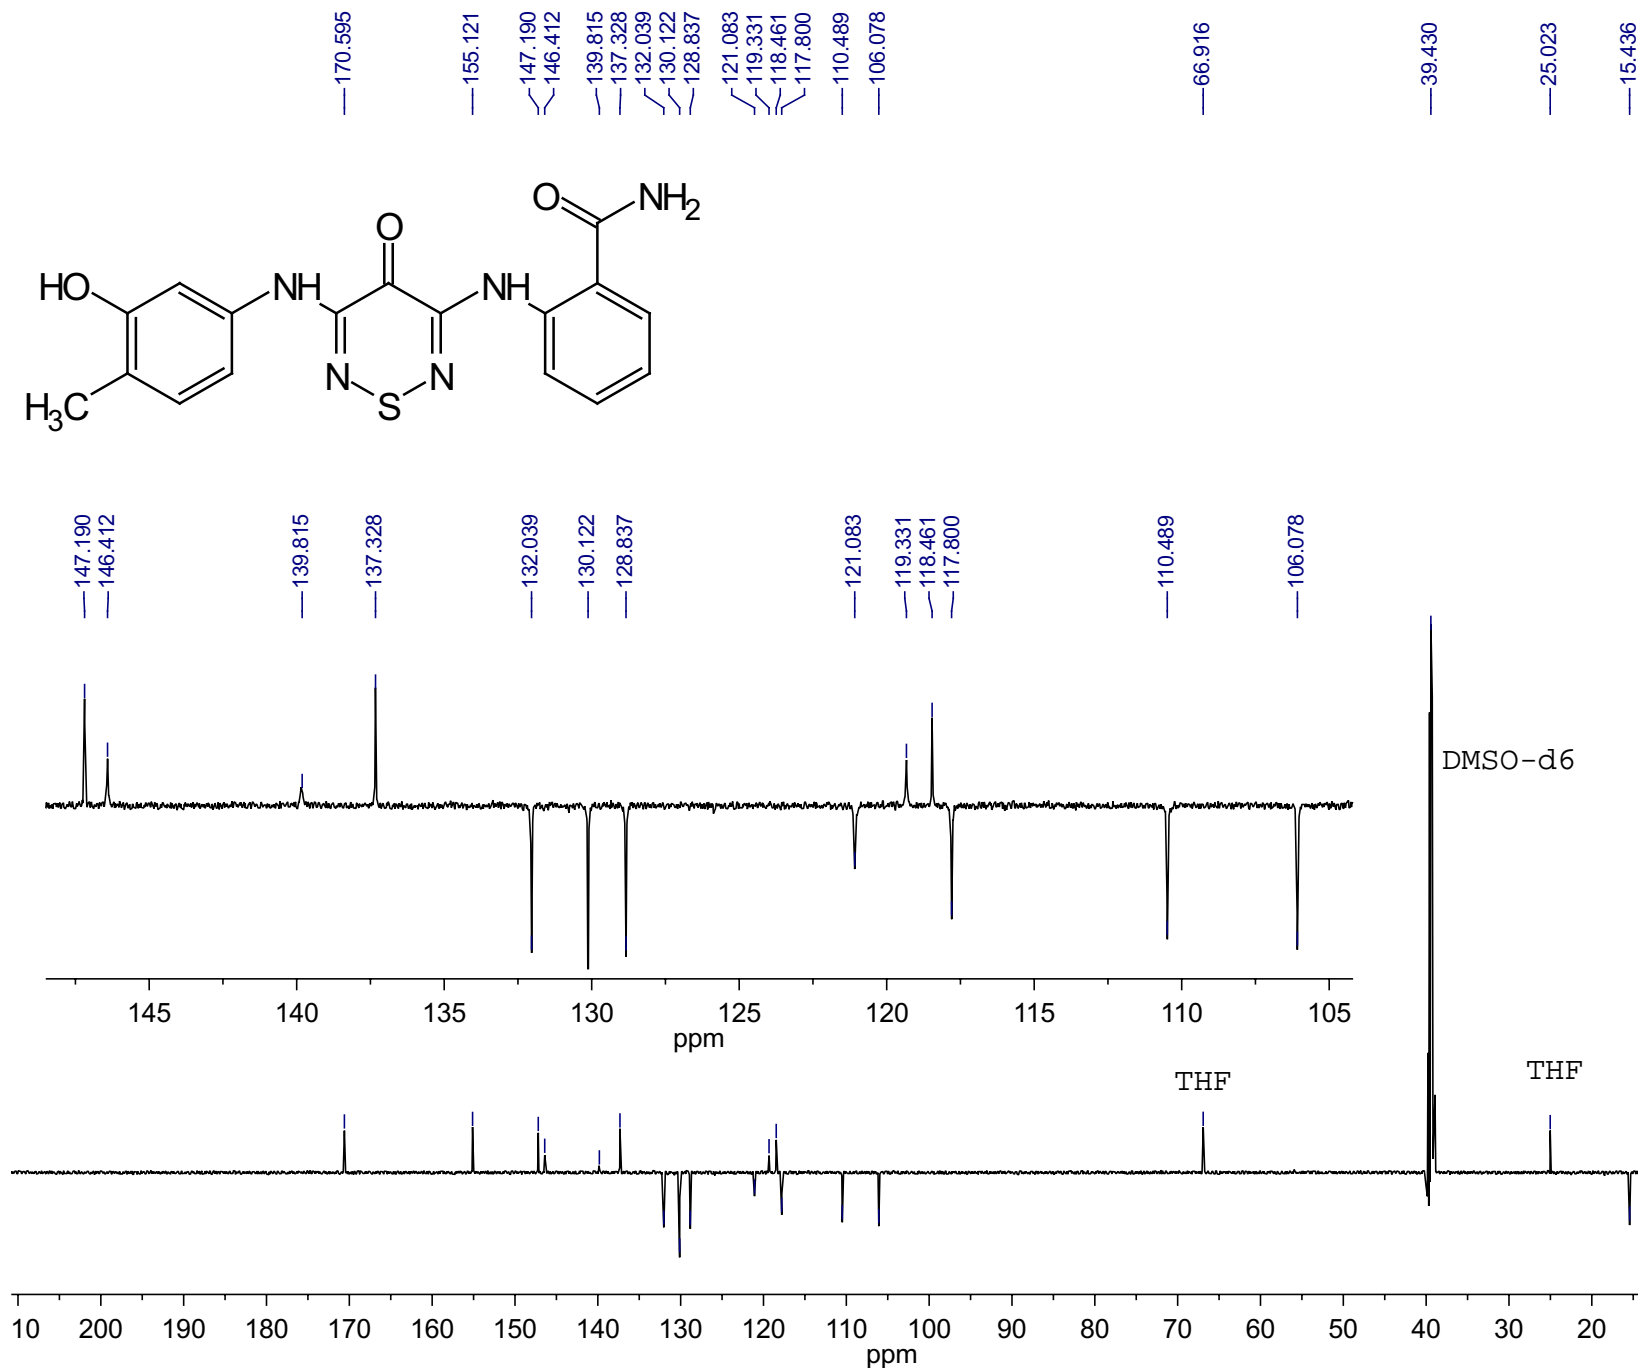

Current Data Parameters

|                             |                 |
|-----------------------------|-----------------|
| NAME                        | Kalogirou       |
| EXPNO                       | 345             |
| PROCNO                      | 1               |
| F2 - Acquisition Parameters |                 |
| Date_                       | 20170628        |
| Time                        | 8.55            |
| INSTRUM                     | spect           |
| PROBHD                      | 5 mm PABBO BB-  |
| PULPROG                     | jmod            |
| TD                          | 65536           |
| SOLVENT                     | DMSO            |
| NS                          | 10240           |
| DS                          | 4               |
| SWH                         | 29761.904 Hz    |
| FIDRES                      | 0.454131 Hz     |
| AQ                          | 1.1010048 sec   |
| RG                          | 2050            |
| DW                          | 16.800 usec     |
| DE                          | 6.50 usec       |
| TE                          | 299.5 K         |
| CNST2                       | 145.0000000     |
| CNST11                      | 1.0000000       |
| D1                          | 2.00000000 sec  |
| D20                         | 0.00689655 sec  |
| TD0                         | 1               |
| ===== CHANNEL f1 =====      |                 |
| SFO1                        | 125.7459782 MHz |
| NUC1                        | <sup>13</sup> C |
| P1                          | 9.00 usec       |
| P2                          | 18.00 usec      |
| PLW1                        | 140.00000000 W  |
| ===== CHANNEL f2 =====      |                 |
| SFO2                        | 500.0350280 MHz |
| NUC2                        | <sup>1</sup> H  |
| CPDPRG2                     | waltz16         |
| PCPD2                       | 80.00 usec      |
| PLW2                        | 14.50000000 W   |
| PLW12                       | 0.32624999 W    |
| F2 - Processing parameters  |                 |
| SI                          | 32768           |
| SF                          | 125.7334769 MHz |
| WDW                         | EM              |
| SSB                         | 0               |
| LB                          | 1.00 Hz         |
| GB                          | 0               |
| PC                          | 1.40            |



<sup>1</sup>H-NMR of 3-((4-(1*H*-imidazol-2-yl)phenyl)amino)-5-((3-hydroxy-4-methylphenyl)amino)-4*H*-1,2,6-thiadiazin-4-one (**11**)

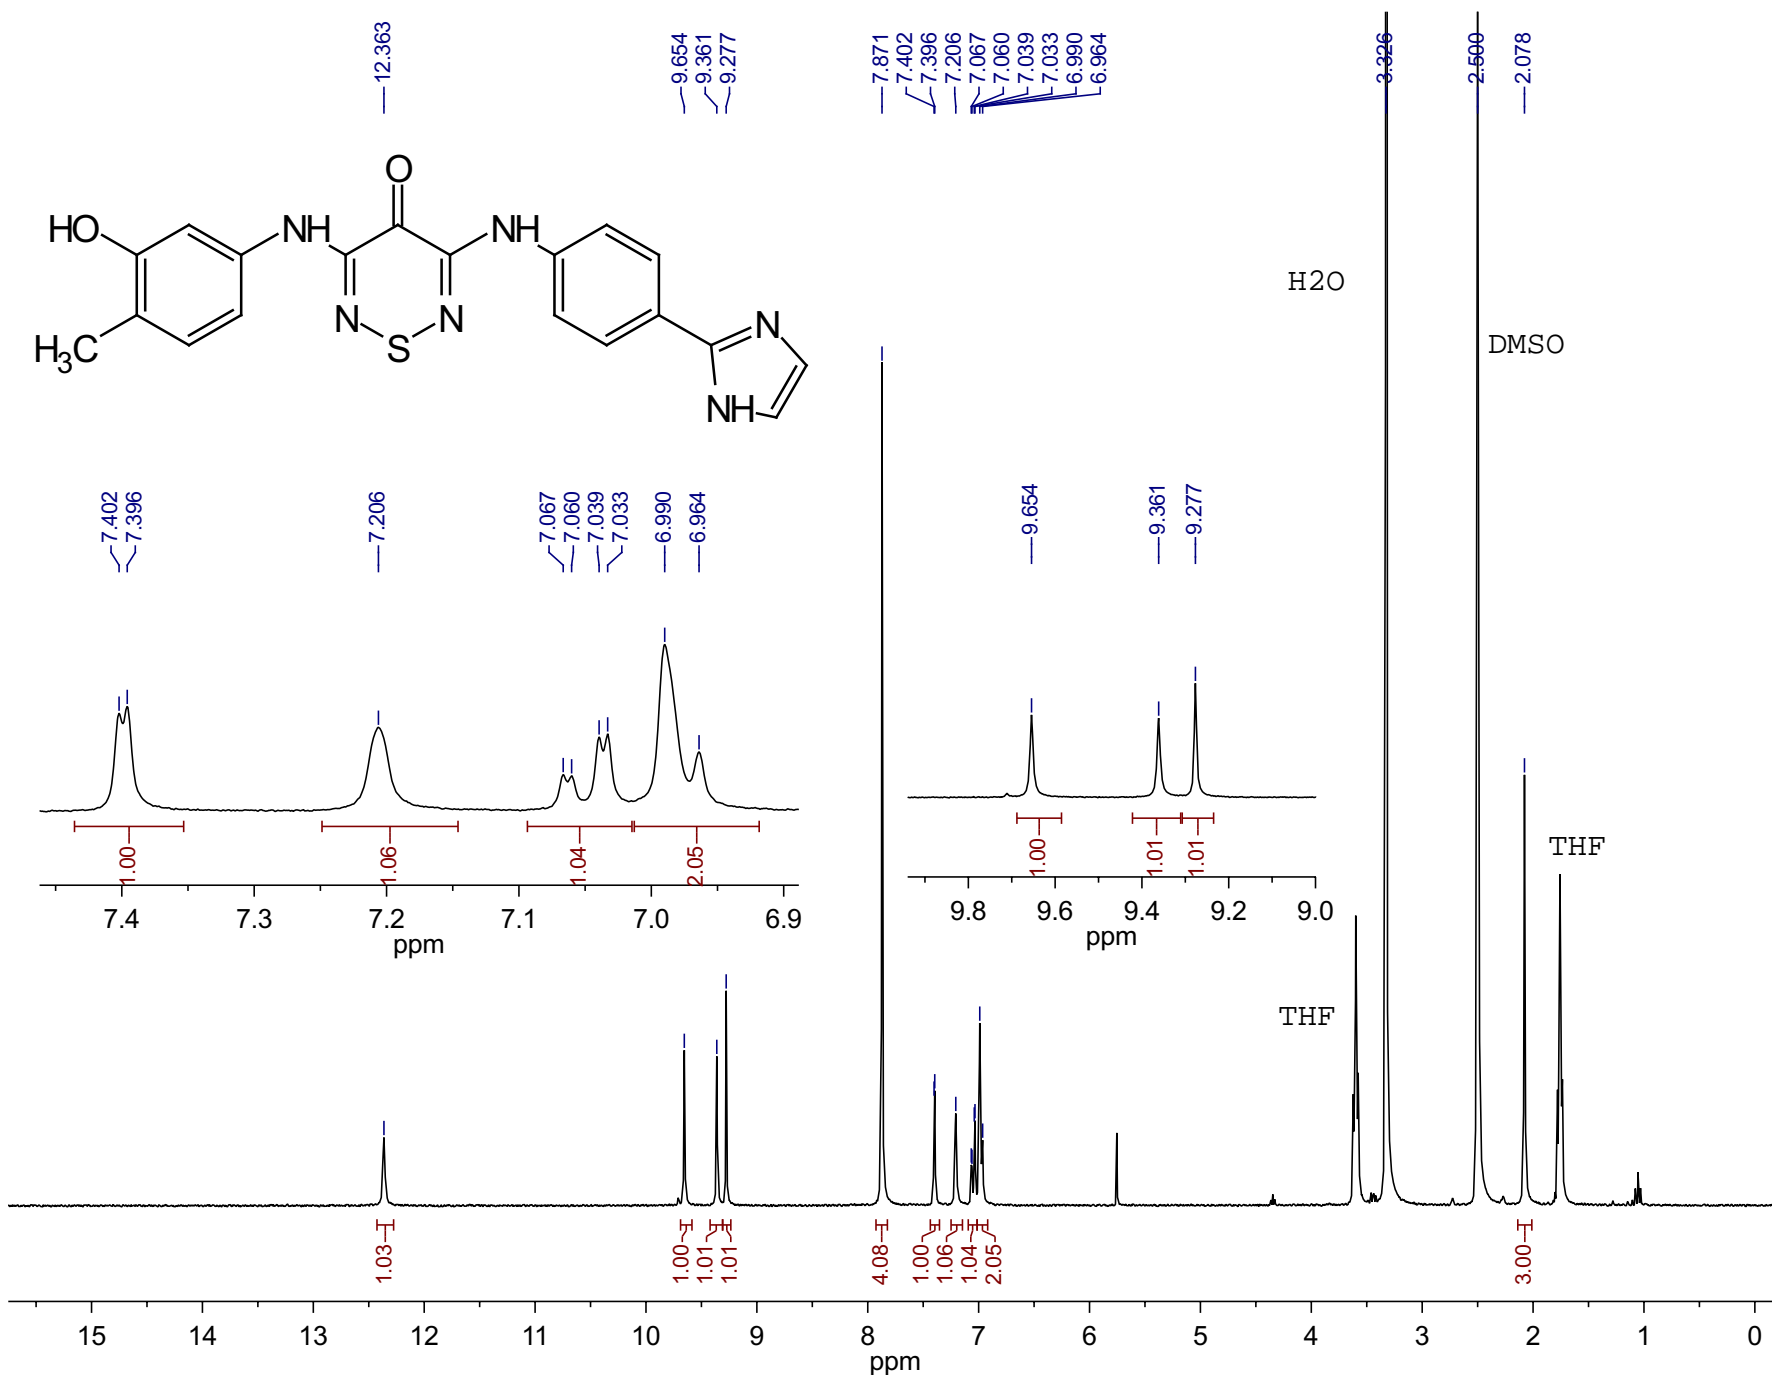

Current Data Parameters

NAME Andreas  
EXPNO 47  
PROCNO 1

F2 - Acquisition Parameters

Date\_ 20170921  
Time 19.28 h  
INSTRUM spect  
PROBHD Z104275\_0375 (  
PULPROG zg30  
TD 65536  
SOLVENT DMSO  
NS 16  
DS 2  
SWH 6009.615 Hz  
FIDRES 0.183399 Hz  
AQ 5.4525952 sec  
RG 201.81  
DW 83.200 usec  
DE 6.50 usec  
TE 298.2 K  
D1 1.0000000 sec  
TD0 1  
SFO1 300.1318533 MHz  
NUC1 1H  
P1 14.00 usec  
PLW1 7.50000000 W

F2 - Processing parameters

SI 65536  
SF 300.1300032 MHz  
WDW EM  
SSB 0  
LB 0.30 Hz  
GB 0  
PC 1.00

<sup>13</sup>C-NMR of 3-((4-(1*H*-imidazol-2-yl)phenyl)amino)-5-((3-hydroxy-4-methylphenyl)amino)-4*H*-1,2,6-thiadiazin-4-one (11)

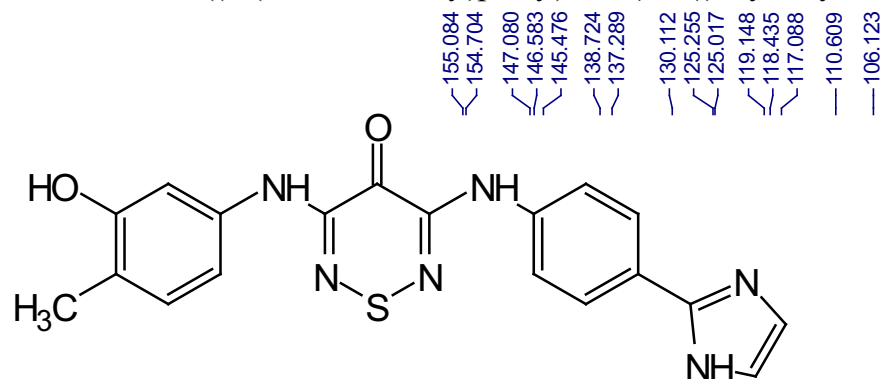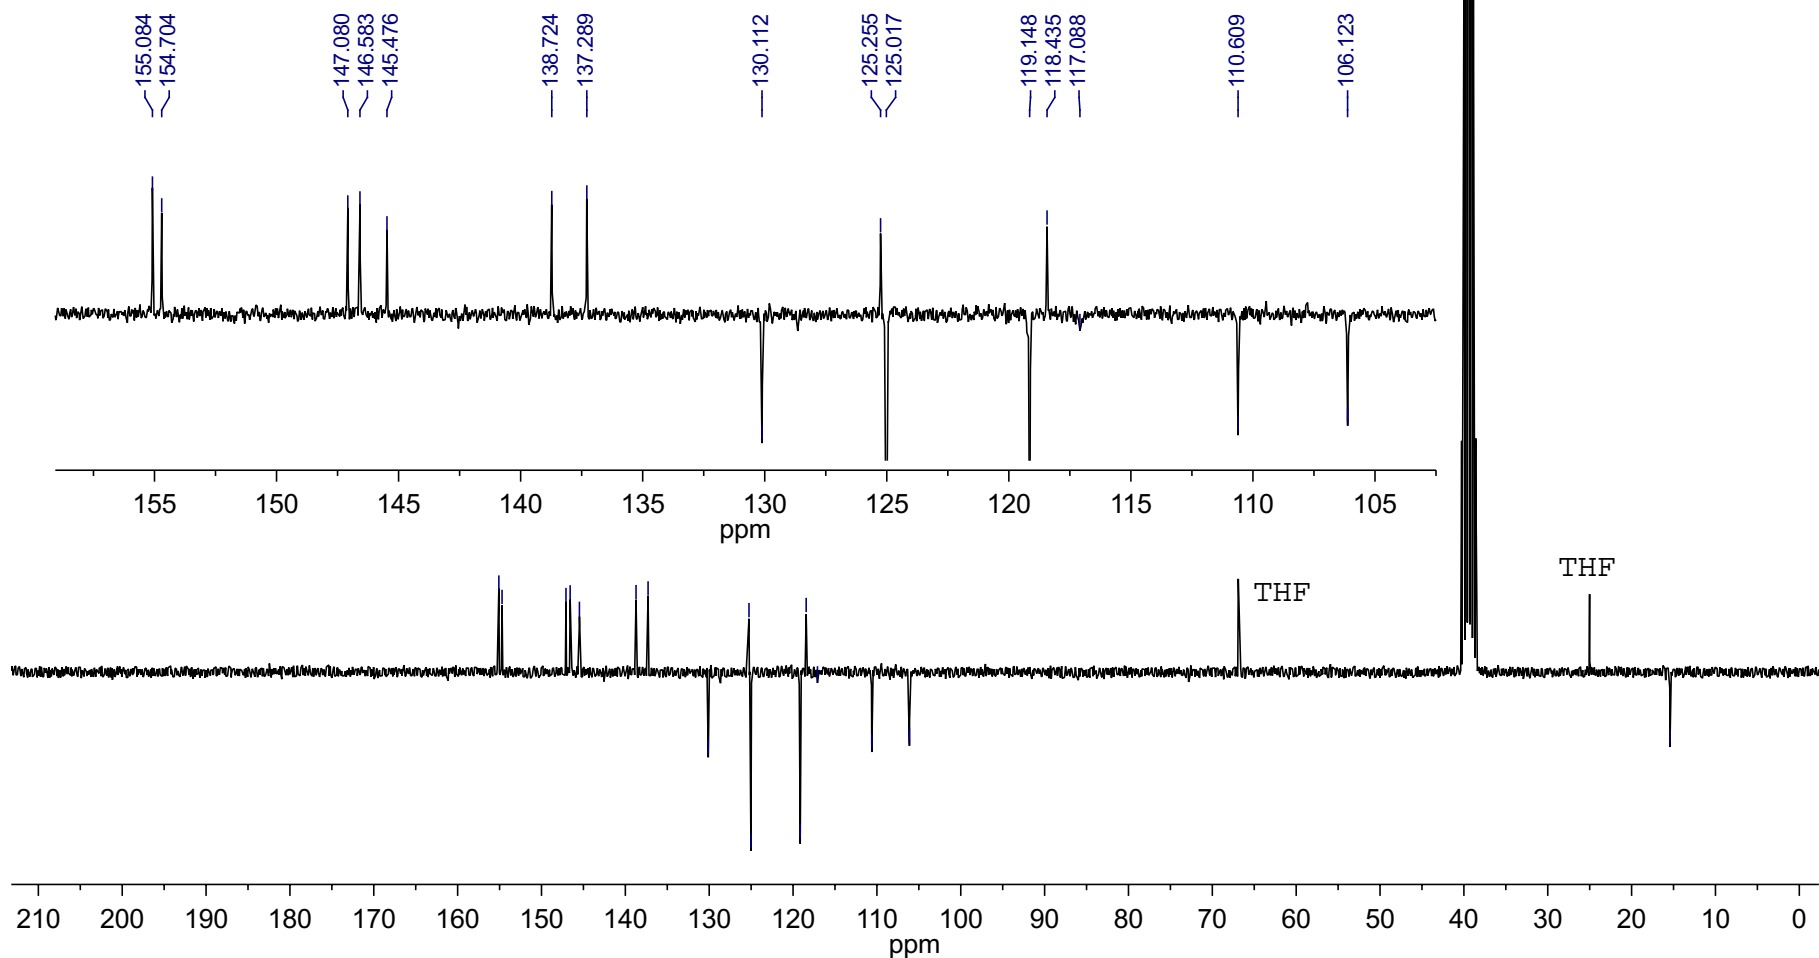

| Current Data Parameters     |                 |
|-----------------------------|-----------------|
| NAME                        | Andreas         |
| EXPNO                       | 48              |
| PROCNO                      | 1               |
| F2 - Acquisition Parameters |                 |
| Date_                       | 20170922        |
| Time                        | 9.51 h          |
| INSTRUM                     | spect           |
| PROBHD                      | Z104275_0375 (  |
| PULPROG                     | jmod            |
| TD                          | 65536           |
| SOLVENT                     | DMSO            |
| NS                          | 13252           |
| DS                          | 4               |
| SWH                         | 18115.941 Hz    |
| FIDRES                      | 0.552855 Hz     |
| AQ                          | 1.8087935 sec   |
| RG                          | 201.81          |
| DW                          | 27.600 usec     |
| DE                          | 6.50 usec       |
| TE                          | 298.4 K         |
| CNST2                       | 145.0000000     |
| CNST11                      | 1.0000000       |
| D1                          | 2.00000000 sec  |
| D20                         | 0.00689655 sec  |
| TD0                         | 1               |
| SFO1                        | 75.4752953 MHz  |
| NUC1                        | 13C             |
| P1                          | 10.00 usec      |
| P2                          | 20.00 usec      |
| PLW1                        | 40.05500031 W   |
| SFO2                        | 300.1312005 MHz |
| NUC2                        | 1H              |
| CPDPRG[2                    | waltz16         |
| PCPD2                       | 90.00 usec      |
| PLW2                        | 7.50000000 W    |
| PLW12                       | 0.18148001 W    |
| F2 - Processing parameters  |                 |
| SI                          | 32768           |
| SF                          | 75.4677930 MHz  |
| WDW                         | EM              |
| SSB                         | 0               |
| LB                          | 1.00 Hz         |
| GB                          | 0               |
| PC                          | 1.40            |

<sup>1</sup>H-NMR of 4-((5-((3-hydroxy-4-methylphenyl)amino)-4-oxo-4H-1,2,6-thiadiazin-3-yl)amino)-benzoic acid (**12**)

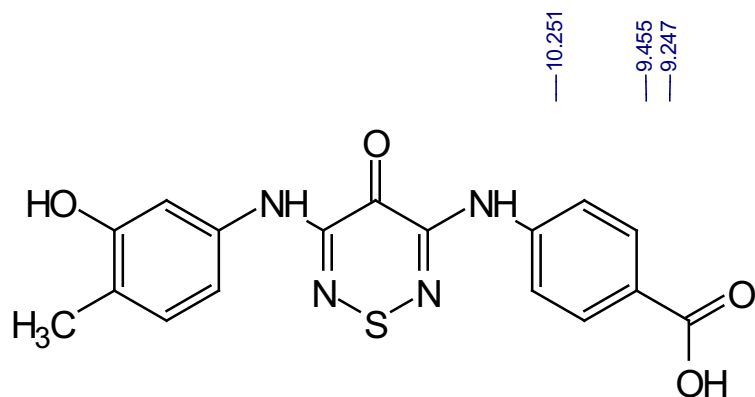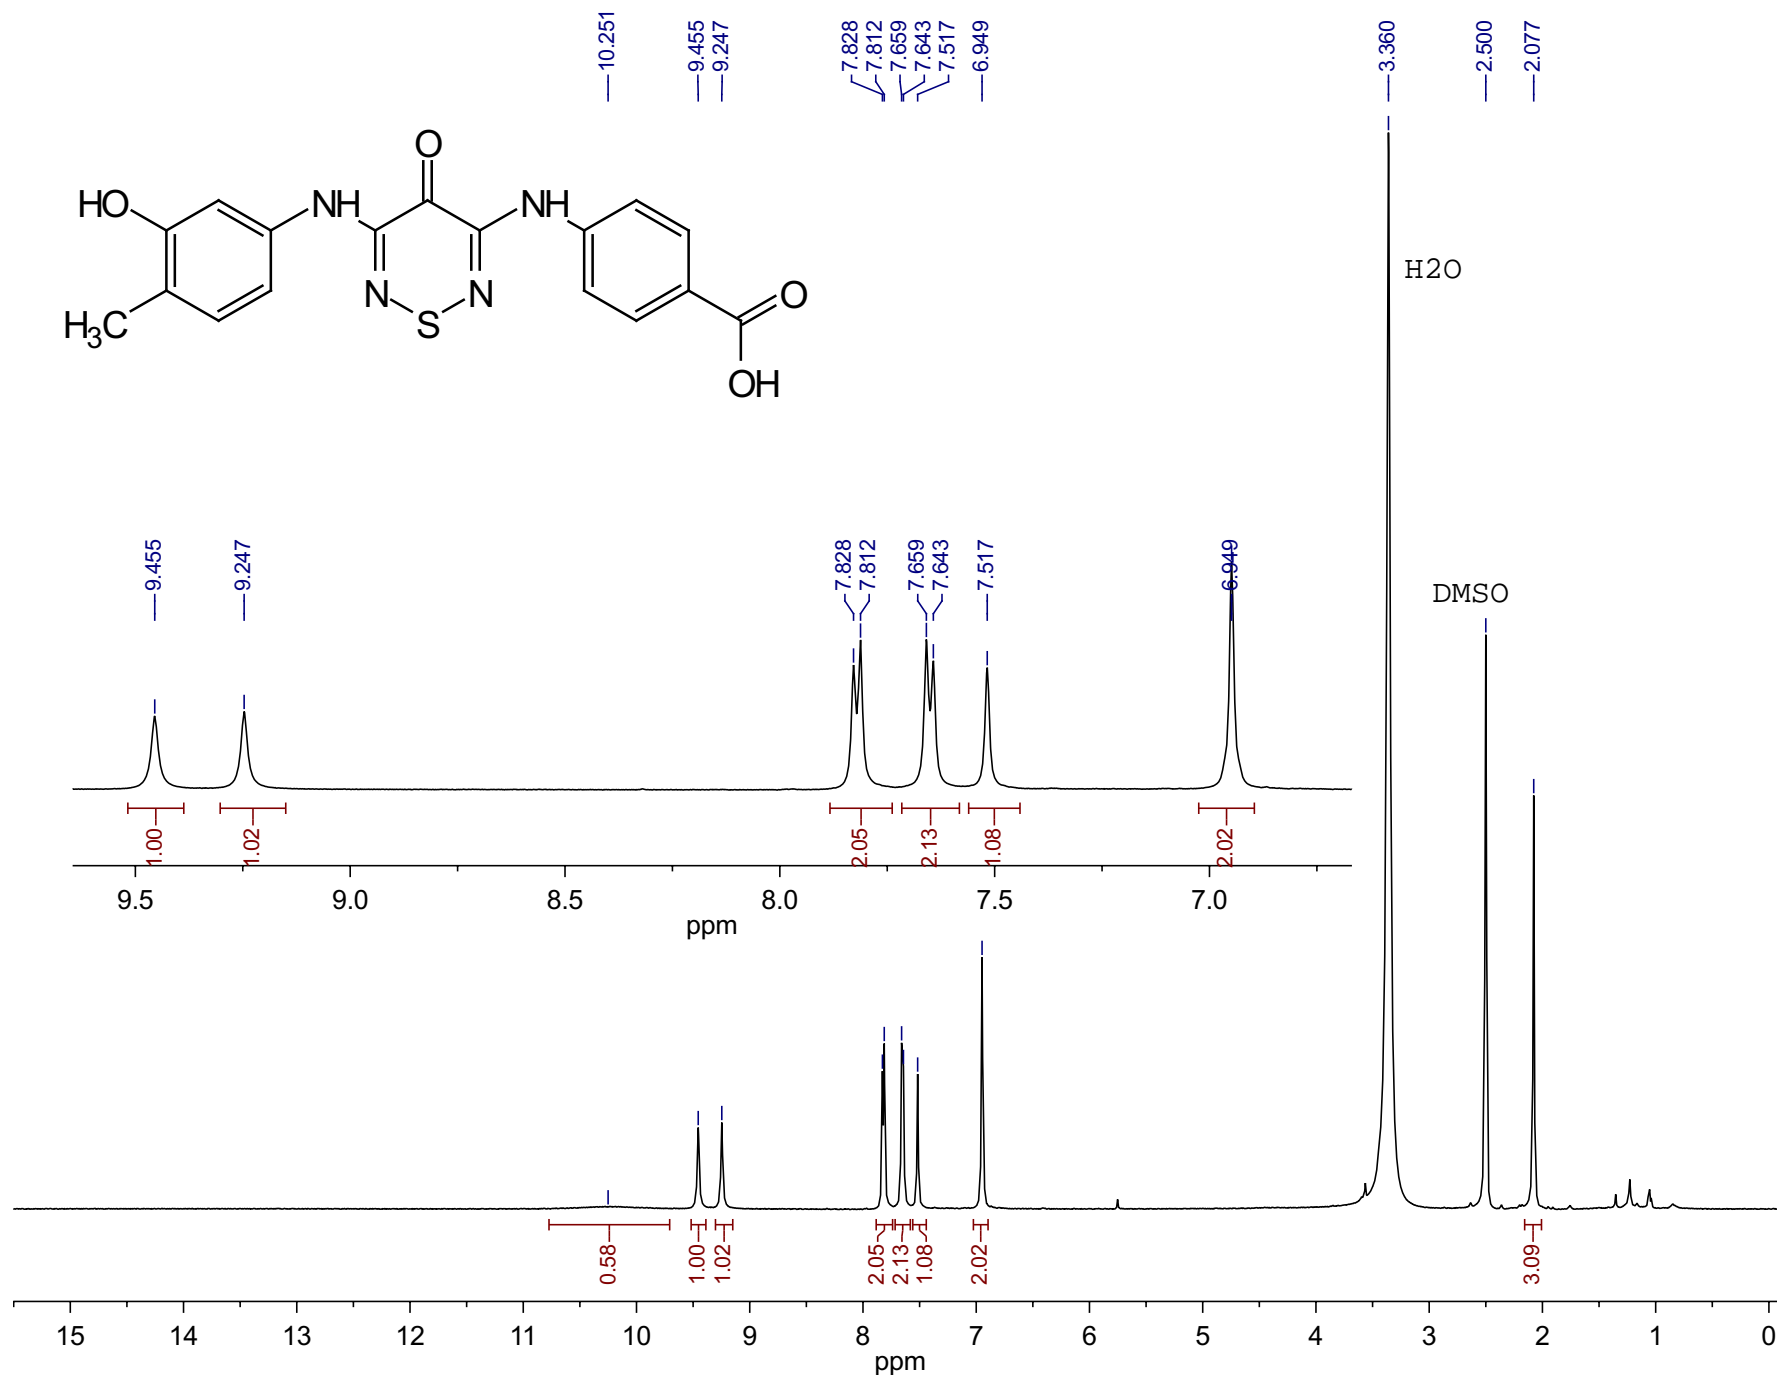

Current Data Parameters  
 NAME Kalogirou  
 EXPNO 346  
 PROCNO 1

F2 - Acquisition Parameters  
 Date\_ 20170629  
 Time 0.23  
 INSTRUM spect  
 PROBHD 5 mm PABBO BB-  
 PULPROG zg30  
 TD 65536  
 SOLVENT DMSO  
 NS 16  
 DS 2  
 SWH 10000.000 Hz  
 FIDRES 0.152588 Hz  
 AQ 3.2767999 sec  
 RG 128  
 DW 50.000 usec  
 DE 6.50 usec  
 TE 298.5 K  
 D1 1.00000000 sec  
 TD0 1

CHANNEL f1  
 SFO1 500.0361158 MHz  
 NUC1 1H  
 P1 12.00 usec  
 PLW1 14.50000000 W

F2 - Processing parameters  
 SI 65536  
 SF 500.0330325 MHz  
 WDW EM  
 SSB 0  
 LB 0.30 Hz  
 GB 0  
 PC 1.00

<sup>13</sup>C-NMR of 4-((5-((3-hydroxy-4-methylphenyl)amino)-4-oxo-4*H*-1,2,6-thiadiazin-3-yl)amino)-benzoic acid (**12**)

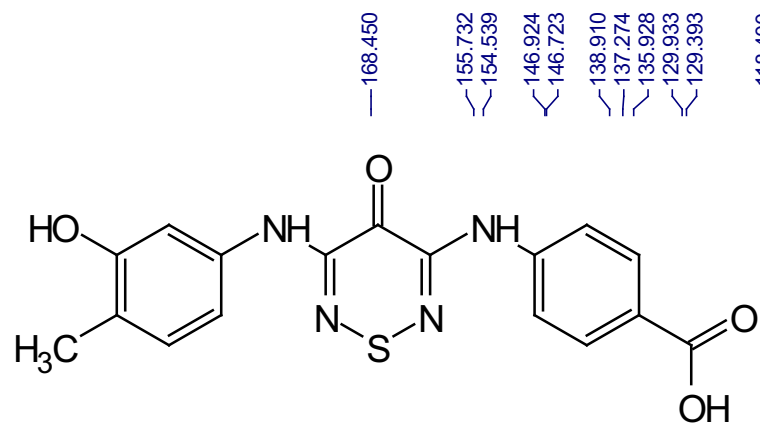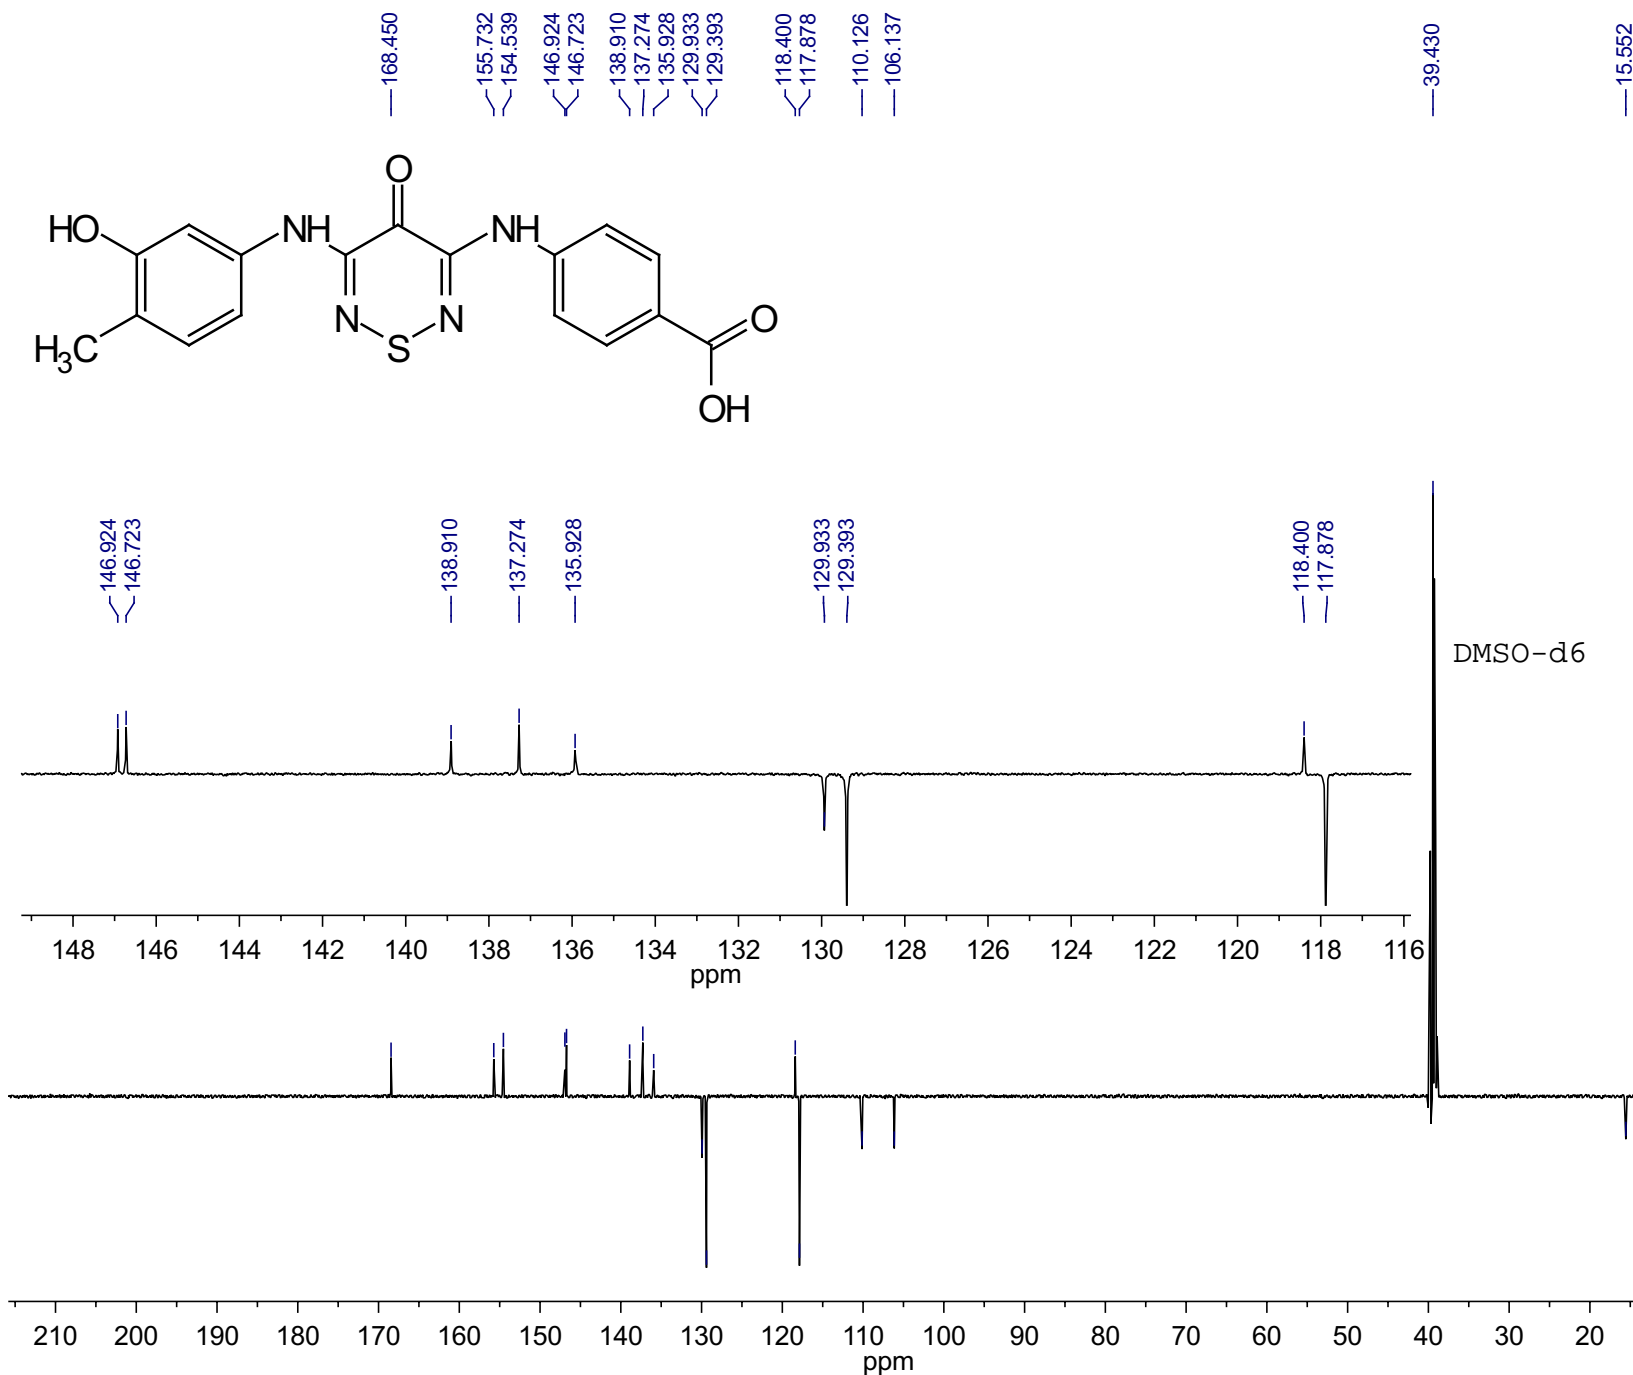

Current Data Parameters

|                             |                 |
|-----------------------------|-----------------|
| NAME                        | Kalogirou       |
| EXPNO                       | 347             |
| PROCNO                      | 1               |
| F2 - Acquisition Parameters |                 |
| Date_                       | 20170629        |
| Time                        | 10.15           |
| INSTRUM                     | spect           |
| PROBHD                      | 5 mm PABBO BB-  |
| PULPROG                     | jmod            |
| TD                          | 65536           |
| SOLVENT                     | DMSO            |
| NS                          | 11264           |
| DS                          | 4               |
| SWH                         | 29761.904 Hz    |
| FIDRES                      | 0.454131 Hz     |
| AQ                          | 1.1010048 sec   |
| RG                          | 1820            |
| DW                          | 16.800 usec     |
| DE                          | 6.50 usec       |
| TE                          | 299.0 K         |
| CNST2                       | 145.0000000     |
| CNST11                      | 1.0000000       |
| D1                          | 2.00000000 sec  |
| D20                         | 0.00689655 sec  |
| TD0                         | 1               |
| ===== CHANNEL f1 =====      |                 |
| SFO1                        | 125.7459782 MHz |
| NUC1                        | 13C             |
| P1                          | 9.00 usec       |
| P2                          | 18.00 usec      |
| PLW1                        | 140.0000000 W   |
| ===== CHANNEL f2 =====      |                 |
| SFO2                        | 500.0350280 MHz |
| NUC2                        | 1H              |
| CPDPRG[2]                   | waltz16         |
| PCPD2                       | 80.00 usec      |
| PLW2                        | 14.50000000 W   |
| PLW12                       | 0.32624999 W    |
| F2 - Processing parameters  |                 |
| SI                          | 32768           |
| SF                          | 125.7334766 MHz |
| WDW                         | EM              |
| SSB                         | 0               |
| LB                          | 1.00 Hz         |
| GB                          | 0               |
| PC                          | 1.40            |

<sup>1</sup>H-NMR of 2-((5-((3-hydroxy-4-methylphenyl)amino)-4-oxo-4H-1,2,6-thiadiazin-3-yl)amino)-benzonitrile (**13**)

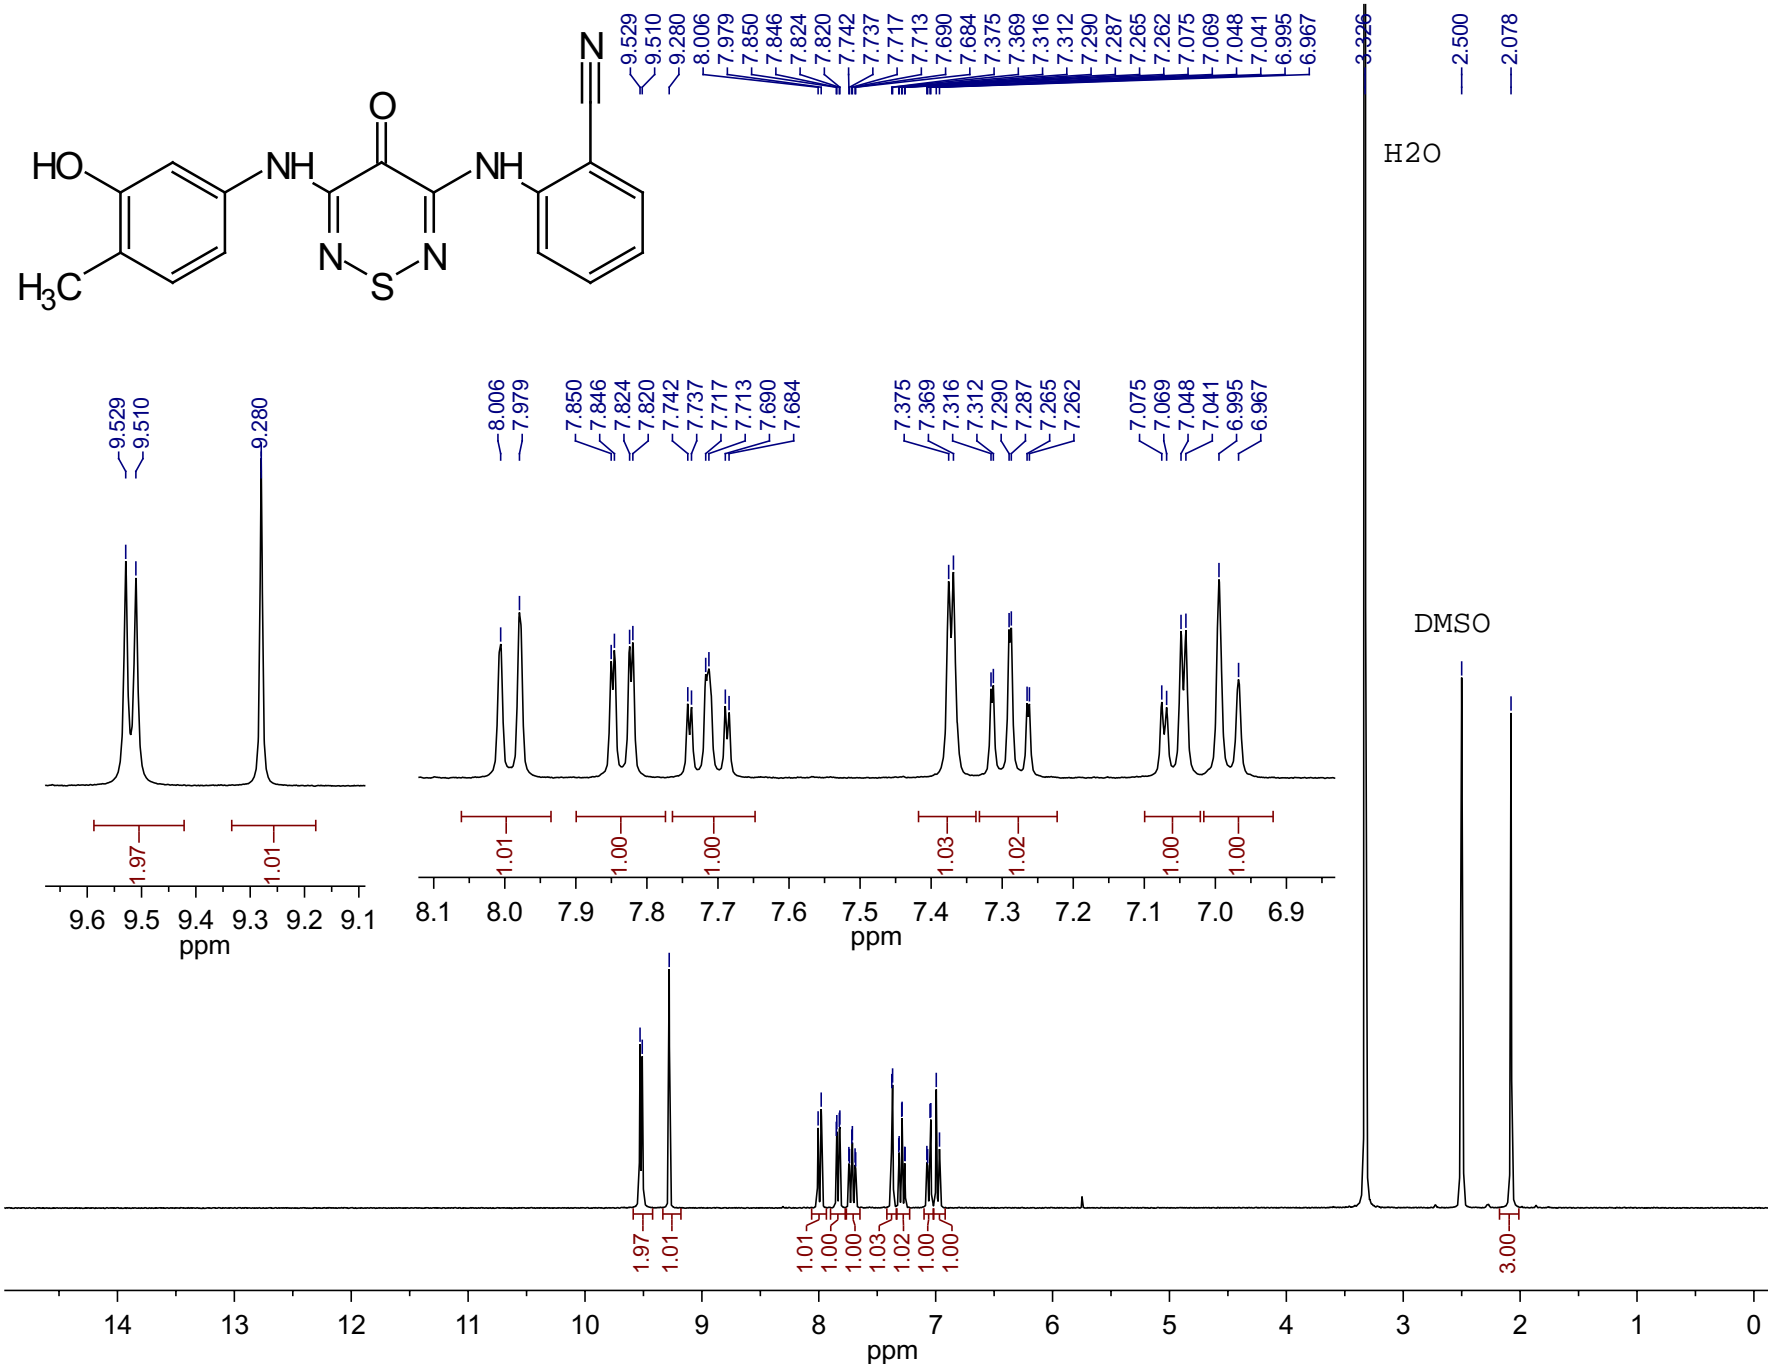

Current Data Parameters

NAME Andreas  
EXPNO 3  
PROCNO 1

F2 - Acquisition Parameters

Date\_ 20170624  
Time 18.38 h  
INSTRUM spect  
PROBHD Z104275\_0375 (zg30)  
PULPROG zg30  
TD 65536  
SOLVENT DMSO  
NS 16  
DS 2  
SWH 6009.615 Hz  
FIDRES 0.183399 Hz  
AQ 5.4525952 sec  
RG 201.81  
DW 83.200 usec  
DE 6.50 usec  
TE 300.5 K  
D1 1.00000000 sec  
TD0 1  
SFO1 300.1318533 MHz  
NUC1 <sup>1</sup>H  
P1 14.00 usec  
PLW1 7.50000000 W

F2 - Processing parameters

SI 65536  
SF 300.1300033 MHz  
WDW EM  
SSB 0  
LB 0.30 Hz  
GB 0  
PC 1.00

<sup>13</sup>C-NMR of 2-((5-((3-hydroxy-4-methylphenyl)amino)-4-oxo-4H-1,2,6-thiadiazin-3-yl)amino)-benzonitrile (**13**)

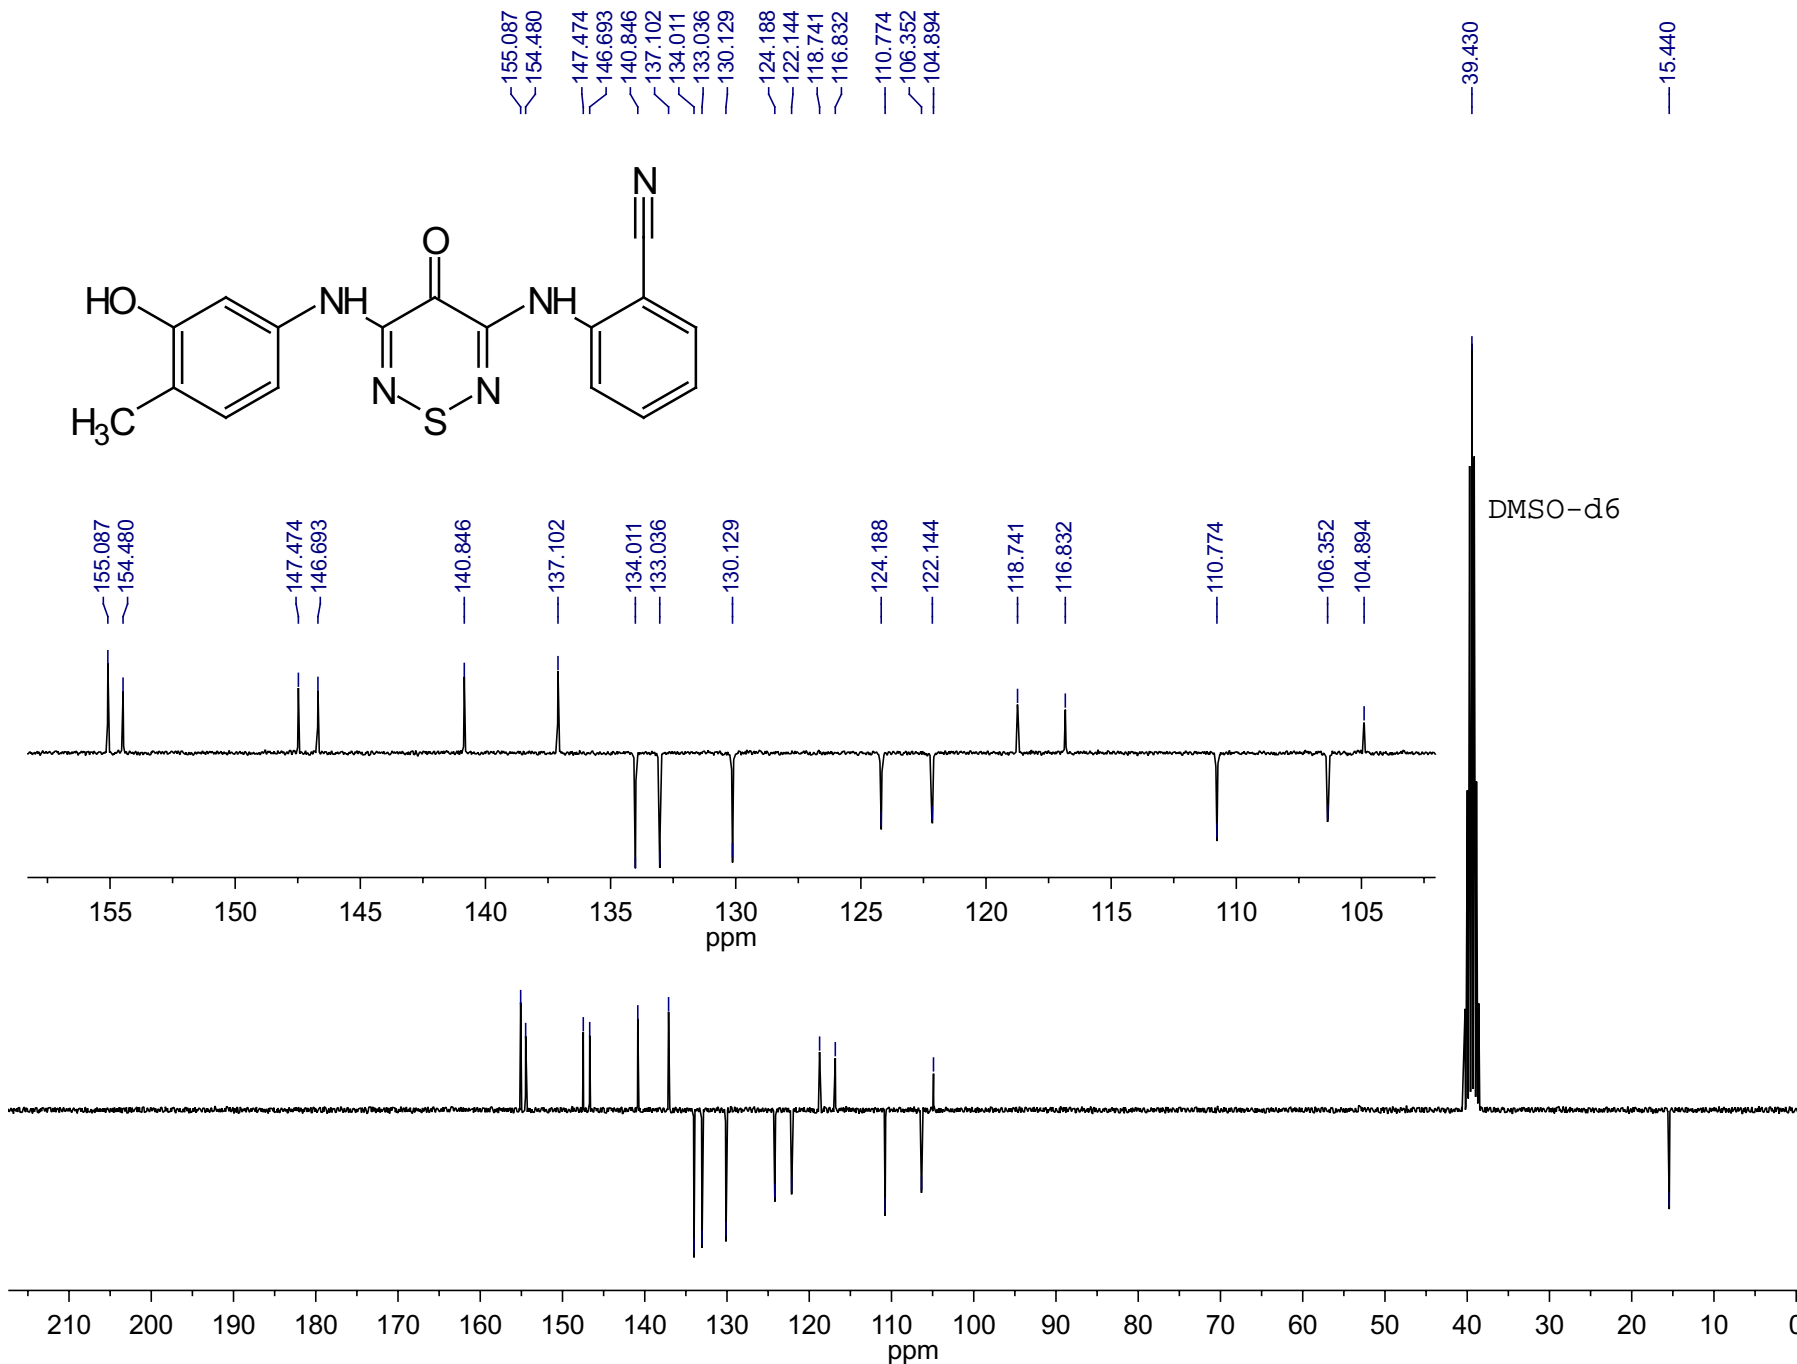

Current Data Parameters

|                             |                 |
|-----------------------------|-----------------|
| NAME                        | Andreas         |
| EXPNO                       | 4               |
| PROCNO                      | 1               |
| F2 - Acquisition Parameters |                 |
| Date_                       | 20170625        |
| Time                        | 10.05 h         |
| INSTRUM                     | spect           |
| PROBHD                      | Z104275_0375 (  |
| PULPROG                     | jmod            |
| TD                          | 65536           |
| SOLVENT                     | DMSO            |
| NS                          | 14336           |
| DS                          | 4               |
| SWH                         | 18115.941 Hz    |
| FIDRES                      | 0.552855 Hz     |
| AQ                          | 1.8087935 sec   |
| RG                          | 201.81          |
| DW                          | 27.600 usec     |
| DE                          | 6.50 usec       |
| TE                          | 301.1 K         |
| CNST2                       | 145.000000      |
| CNST11                      | 1.000000        |
| D1                          | 2.00000000 sec  |
| D20                         | 0.00689655 sec  |
| TD0                         | 1               |
| SFO1                        | 75.4752953 MHz  |
| NUC1                        | <sup>13</sup> C |
| P1                          | 10.00 usec      |
| P2                          | 20.00 usec      |
| PLW1                        | 40.05500031 W   |
| SFO2                        | 300.1312005 MHz |
| NUC2                        | <sup>1</sup> H  |
| CPDPRG2                     | waltz16         |
| PCPD2                       | 90.00 usec      |
| PLW2                        | 7.50000000 W    |
| PLW12                       | 0.18148001 W    |
| F2 - Processing parameters  |                 |
| SI                          | 32768           |
| SF                          | 75.4677923 MHz  |
| WDW                         | EM              |
| SSB                         | 0               |
| LB                          | 1.00 Hz         |
| GB                          | 0               |
| PC                          | 1.40            |

<sup>1</sup>H-NMR of 3-((5-((3-hydroxy-4-methylphenyl)amino)-4-oxo-4H-1,2,6-thiadiazin-3-yl)amino)-benzonitrile (**14**)

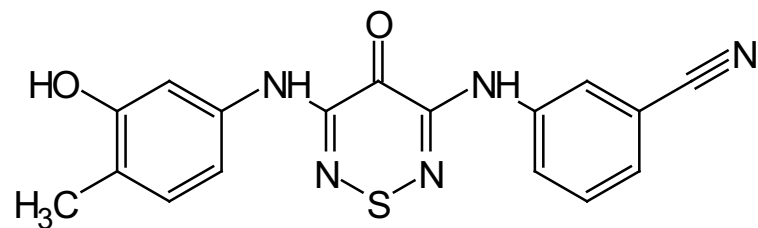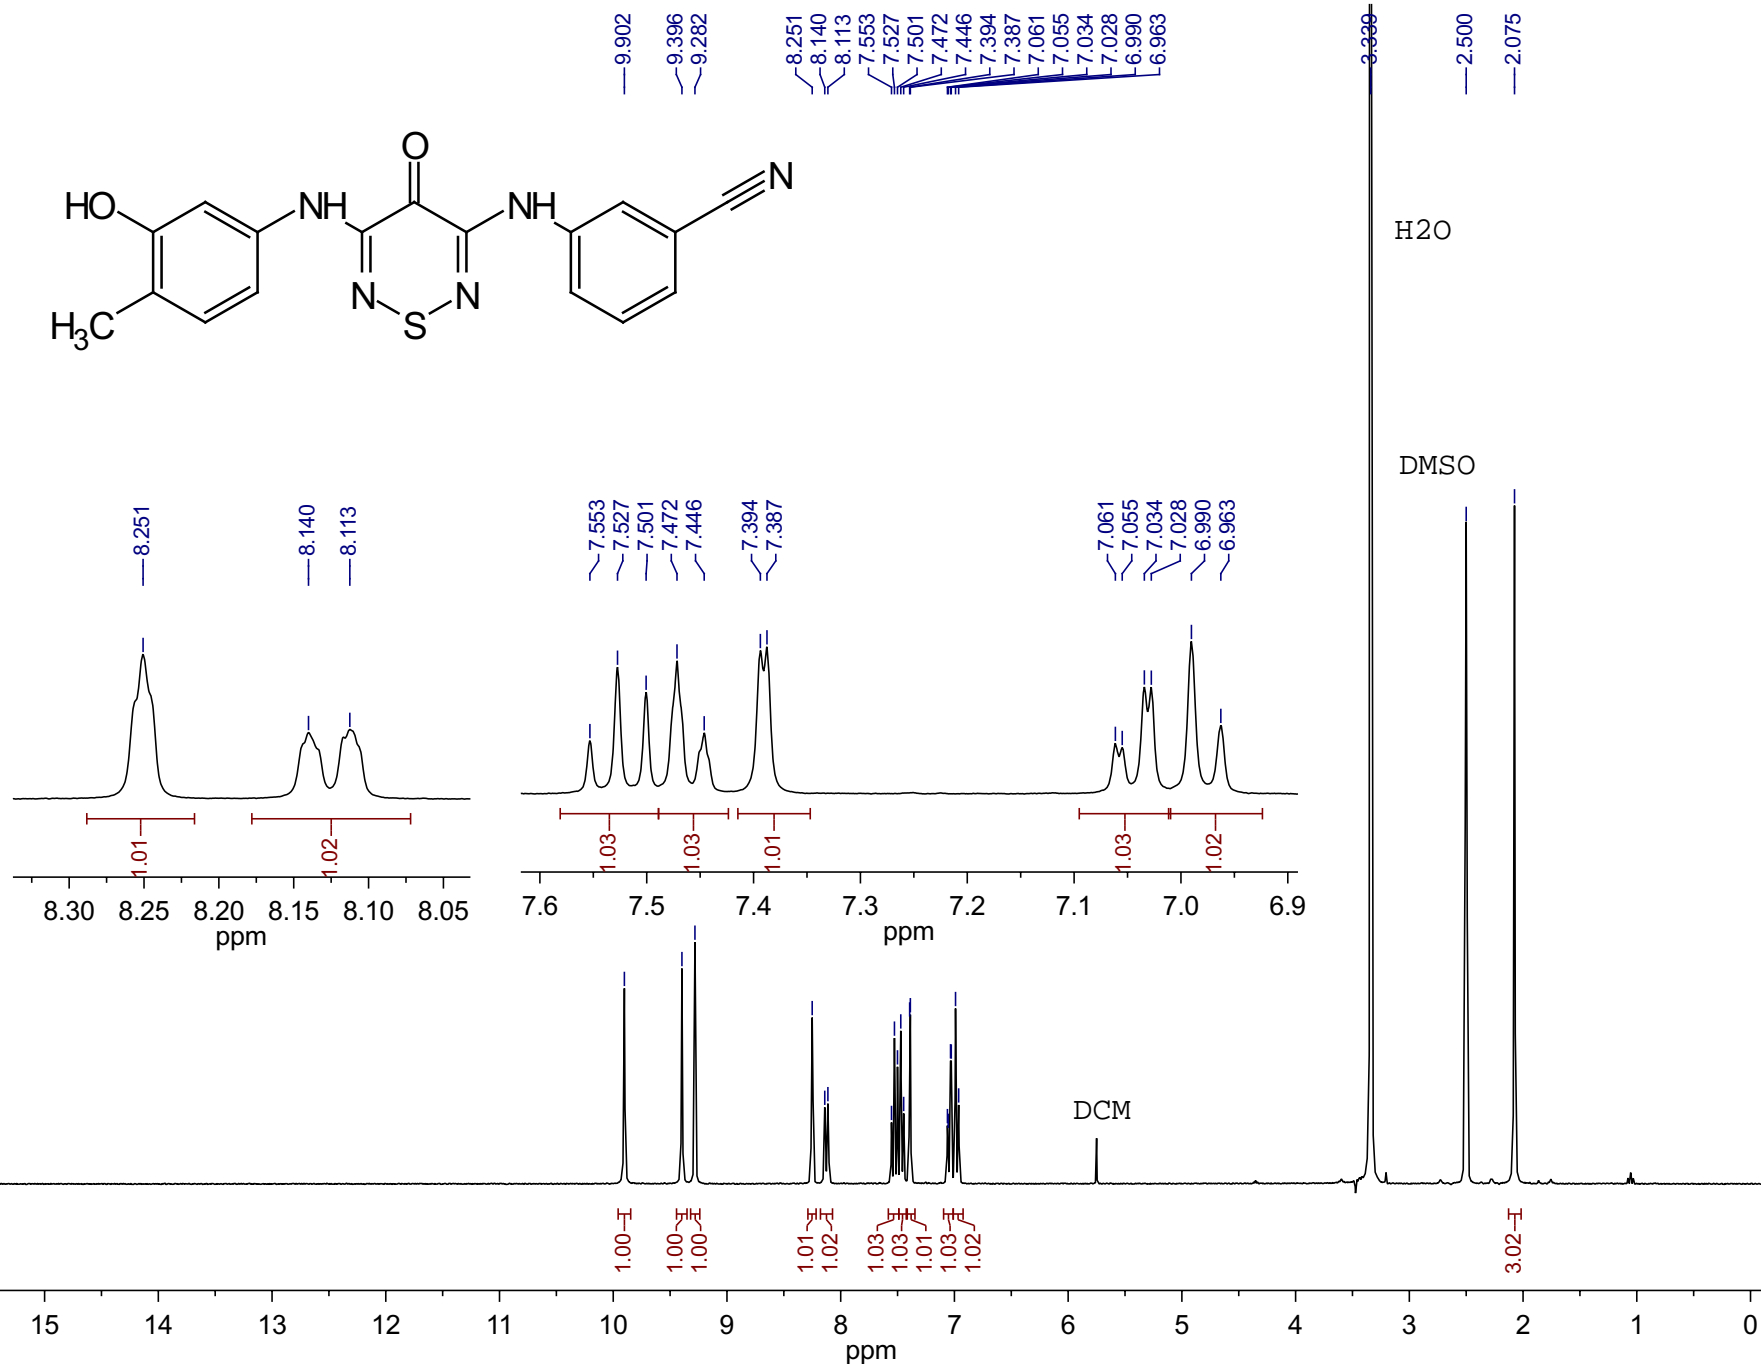

Current Data Parameters

NAME Andreas  
EXPNO 10  
PROCNO 1

F2 - Acquisition Parameters

Date\_ 20170630  
Time 20.49 h  
INSTRUM spect  
PROBHD Z104275\_0375 (   
PULPROG zg30  
TD 65536  
SOLVENT DMSO  
NS 16  
DS 2  
SWH 6009.615 Hz  
FIDRES 0.183399 Hz  
AQ 5.4525952 sec  
RG 201.81  
DW 83.200 usec  
DE 6.50 usec  
TE 298.1 K  
D1 1.00000000 sec  
TD0 1  
SFO1 300.1318533 MHz  
NUC1 1H  
P1 14.00 usec  
PLW1 7.50000000 W

F2 - Processing parameters

SI 65536  
SF 300.1300030 MHz  
WDW EM  
SSB 0  
LB 0.30 Hz  
GB 0  
PC 1.00

<sup>13</sup>C-NMR of 3-((5-((3-hydroxy-4-methylphenyl)amino)-4-oxo-4*H*-1,2,6-thiadiazin-3-yl)amino)-benzonitrile (**14**)

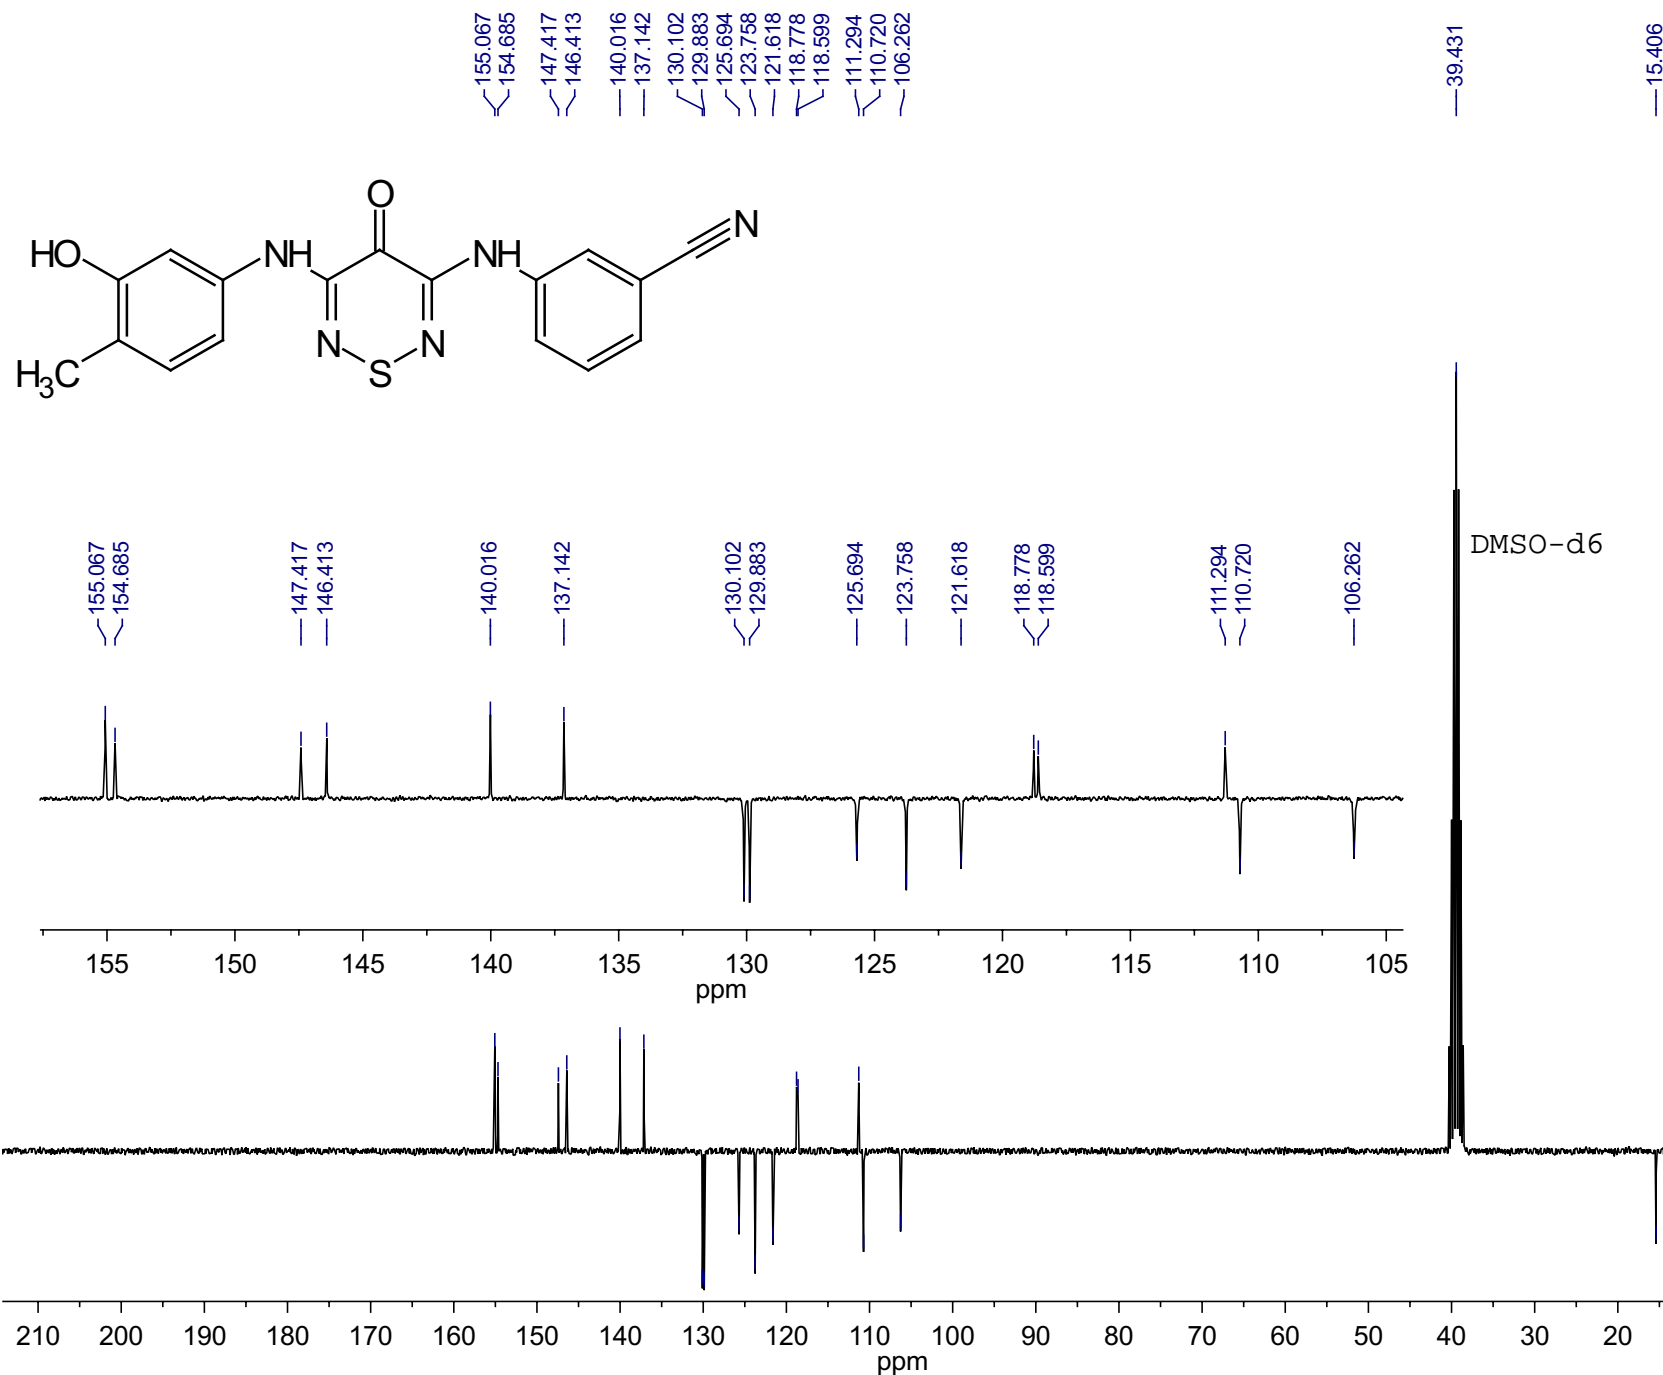

Current Data Parameters

|                             |                 |
|-----------------------------|-----------------|
| NAME                        | Andreas         |
| EXPNO                       | 12              |
| PROCNO                      | 1               |
| F2 - Acquisition Parameters |                 |
| Date_                       | 20170701        |
| Time                        | 7.50 h          |
| INSTRUM                     | spect           |
| PROBHD                      | Z104275_0375 (  |
| PULPROG                     | jmod            |
| TD                          | 65536           |
| SOLVENT                     | DMSO            |
| NS                          | 10240           |
| DS                          | 4               |
| SWH                         | 18115.941 Hz    |
| FIDRES                      | 0.552855 Hz     |
| AQ                          | 1.8087935 sec   |
| RG                          | 201.81          |
| DW                          | 27.600 usec     |
| DE                          | 6.50 usec       |
| TE                          | 298.4 K         |
| CNST2                       | 145.0000000     |
| CNST11                      | 1.0000000       |
| D1                          | 2.00000000 sec  |
| D20                         | 0.00689655 sec  |
| TD0                         | 1               |
| SFO1                        | 75.4752953 MHz  |
| NUC1                        | 13C             |
| P1                          | 10.00 usec      |
| P2                          | 20.00 usec      |
| PLW1                        | 40.05500031 W   |
| SFO2                        | 300.1312005 MHz |
| NUC2                        | 1H              |
| CPDPRG[2                    | waltz16         |
| PCPD2                       | 90.00 usec      |
| PLW2                        | 7.50000000 W    |
| PLW12                       | 0.18148001 W    |
| F2 - Processing parameters  |                 |
| SI                          | 32768           |
| SF                          | 75.4677938 MHz  |
| WDW                         | EM              |
| SSB                         | 0               |
| LB                          | 1.00 Hz         |
| GB                          | 0               |
| PC                          | 1.40            |



<sup>1</sup>H-NMR of 4-((5-((3-hydroxy-4-methylphenyl)amino)-4-oxo-4H-1,2,6-thiadiazin-3-yl)amino)-benzonitrile (**15**)

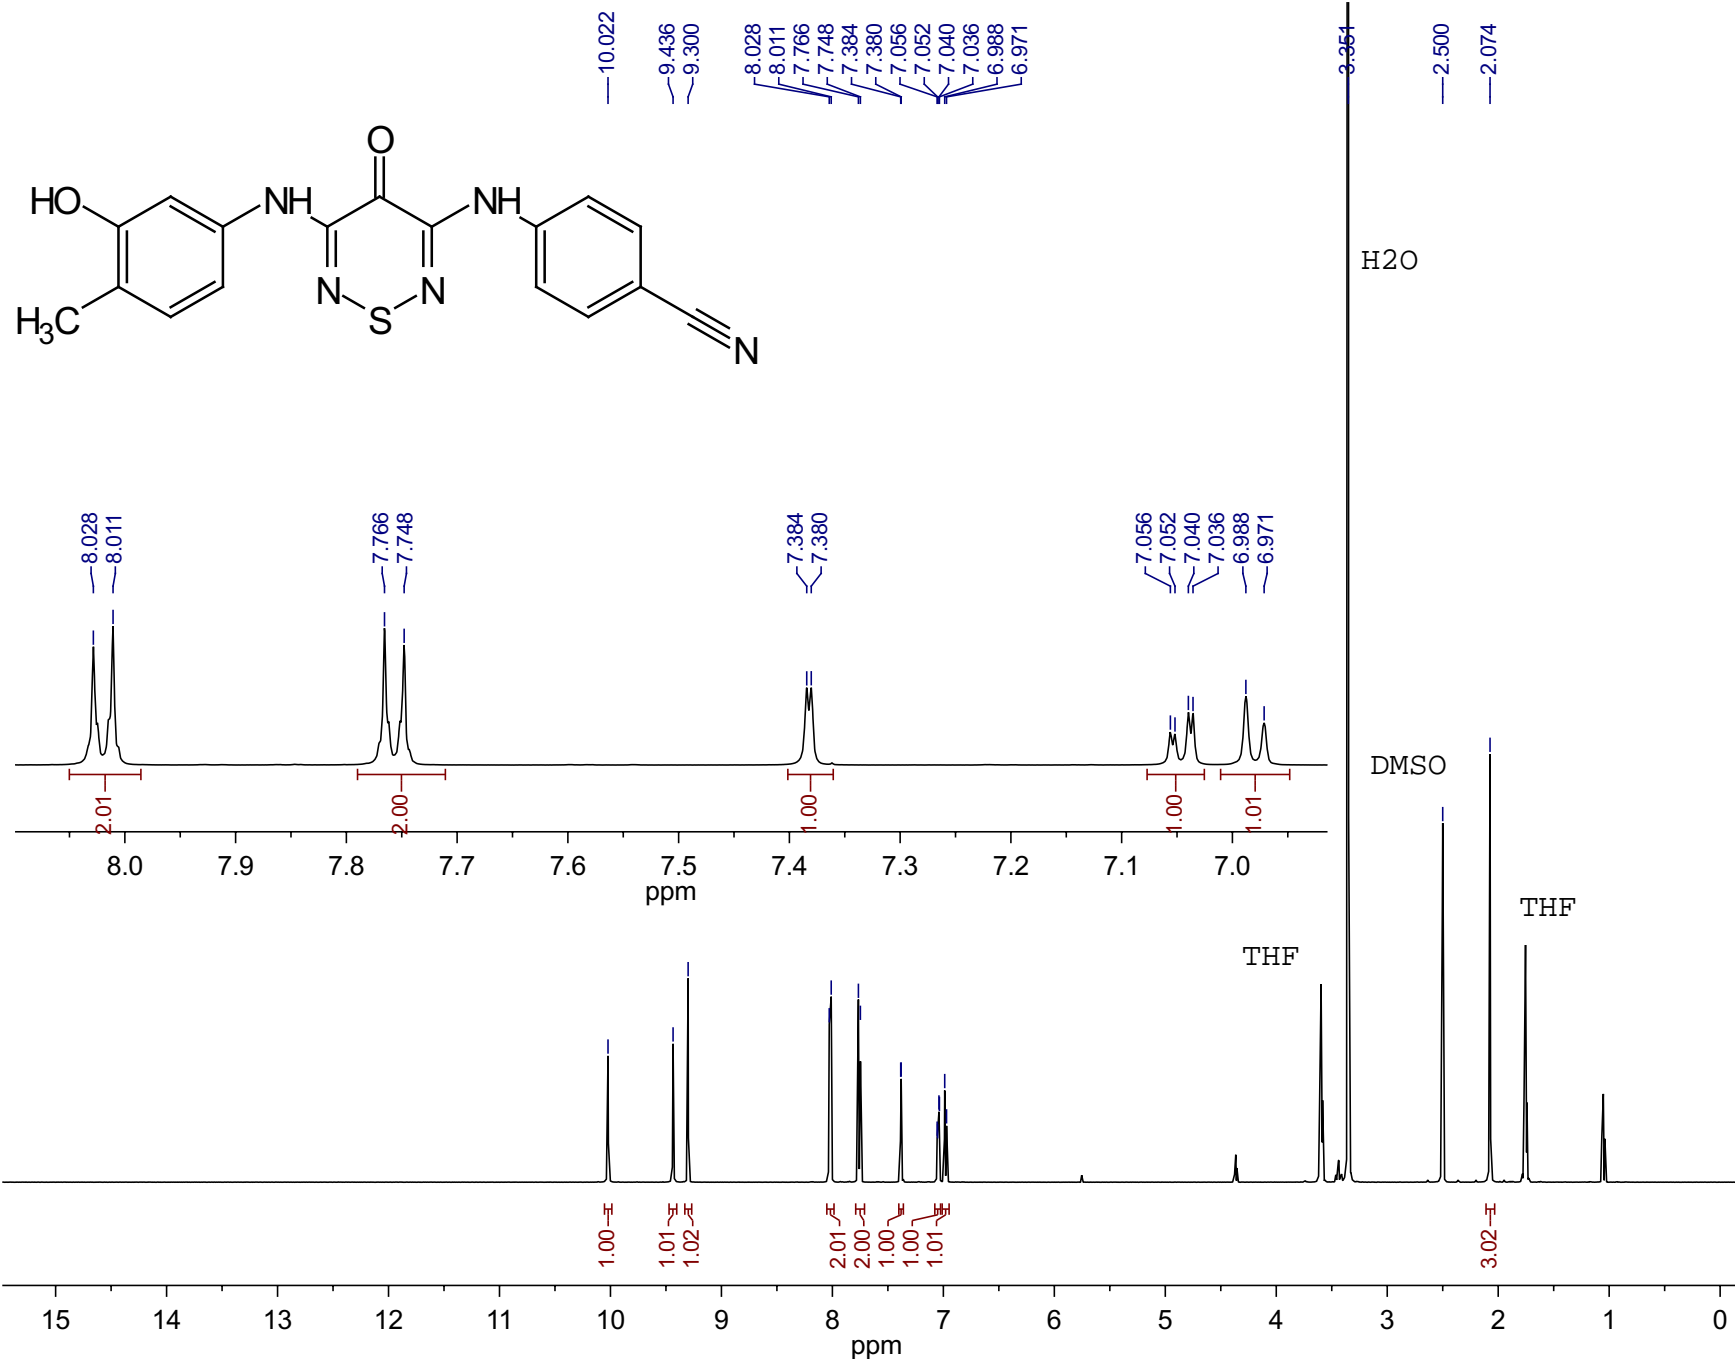

Current Data Parameters

NAME Kalogirou  
EXPNO 333  
PROCNO 1

F2 - Acquisition Parameters

Date\_ 20170613  
Time 16.08  
INSTRUM spect  
PROBHD 5 mm PABBO BB-  
PULPROG zg30  
TD 65536  
SOLVENT DMSO  
NS 16  
DS 2  
SWH 10000.000 Hz  
FIDRES 0.152588 Hz  
AQ 3.2767999 sec  
RG 101  
DW 50.000 usec  
DE 6.50 usec  
TE 295.4 K  
D1 1.00000000 sec  
TD0 1

CHANNEL f1

SFO1 500.0361158 MHz  
NUC1 <sup>1</sup>H  
P1 12.00 usec  
PLW1 14.50000000 W

F2 - Processing parameters

SI 65536  
SF 500.0330320 MHz  
WDW EM  
SSB 0  
LB 0.30 Hz  
GB 0  
PC 1.00

<sup>13</sup>C-NMR of 4-((5-((3-hydroxy-4-methylphenyl)amino)-4-oxo-4H-1,2,6-thiadiazin-3-yl)amino)-benzonitrile (**15**)

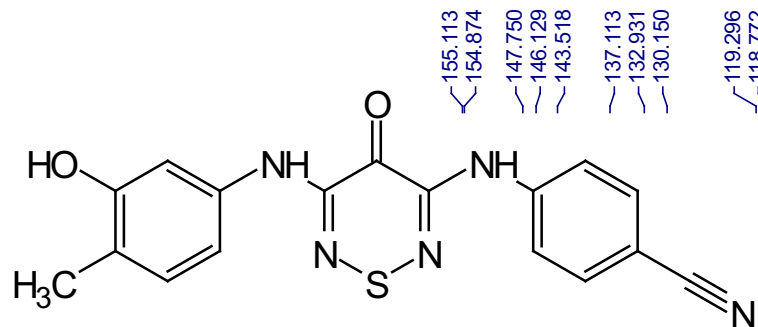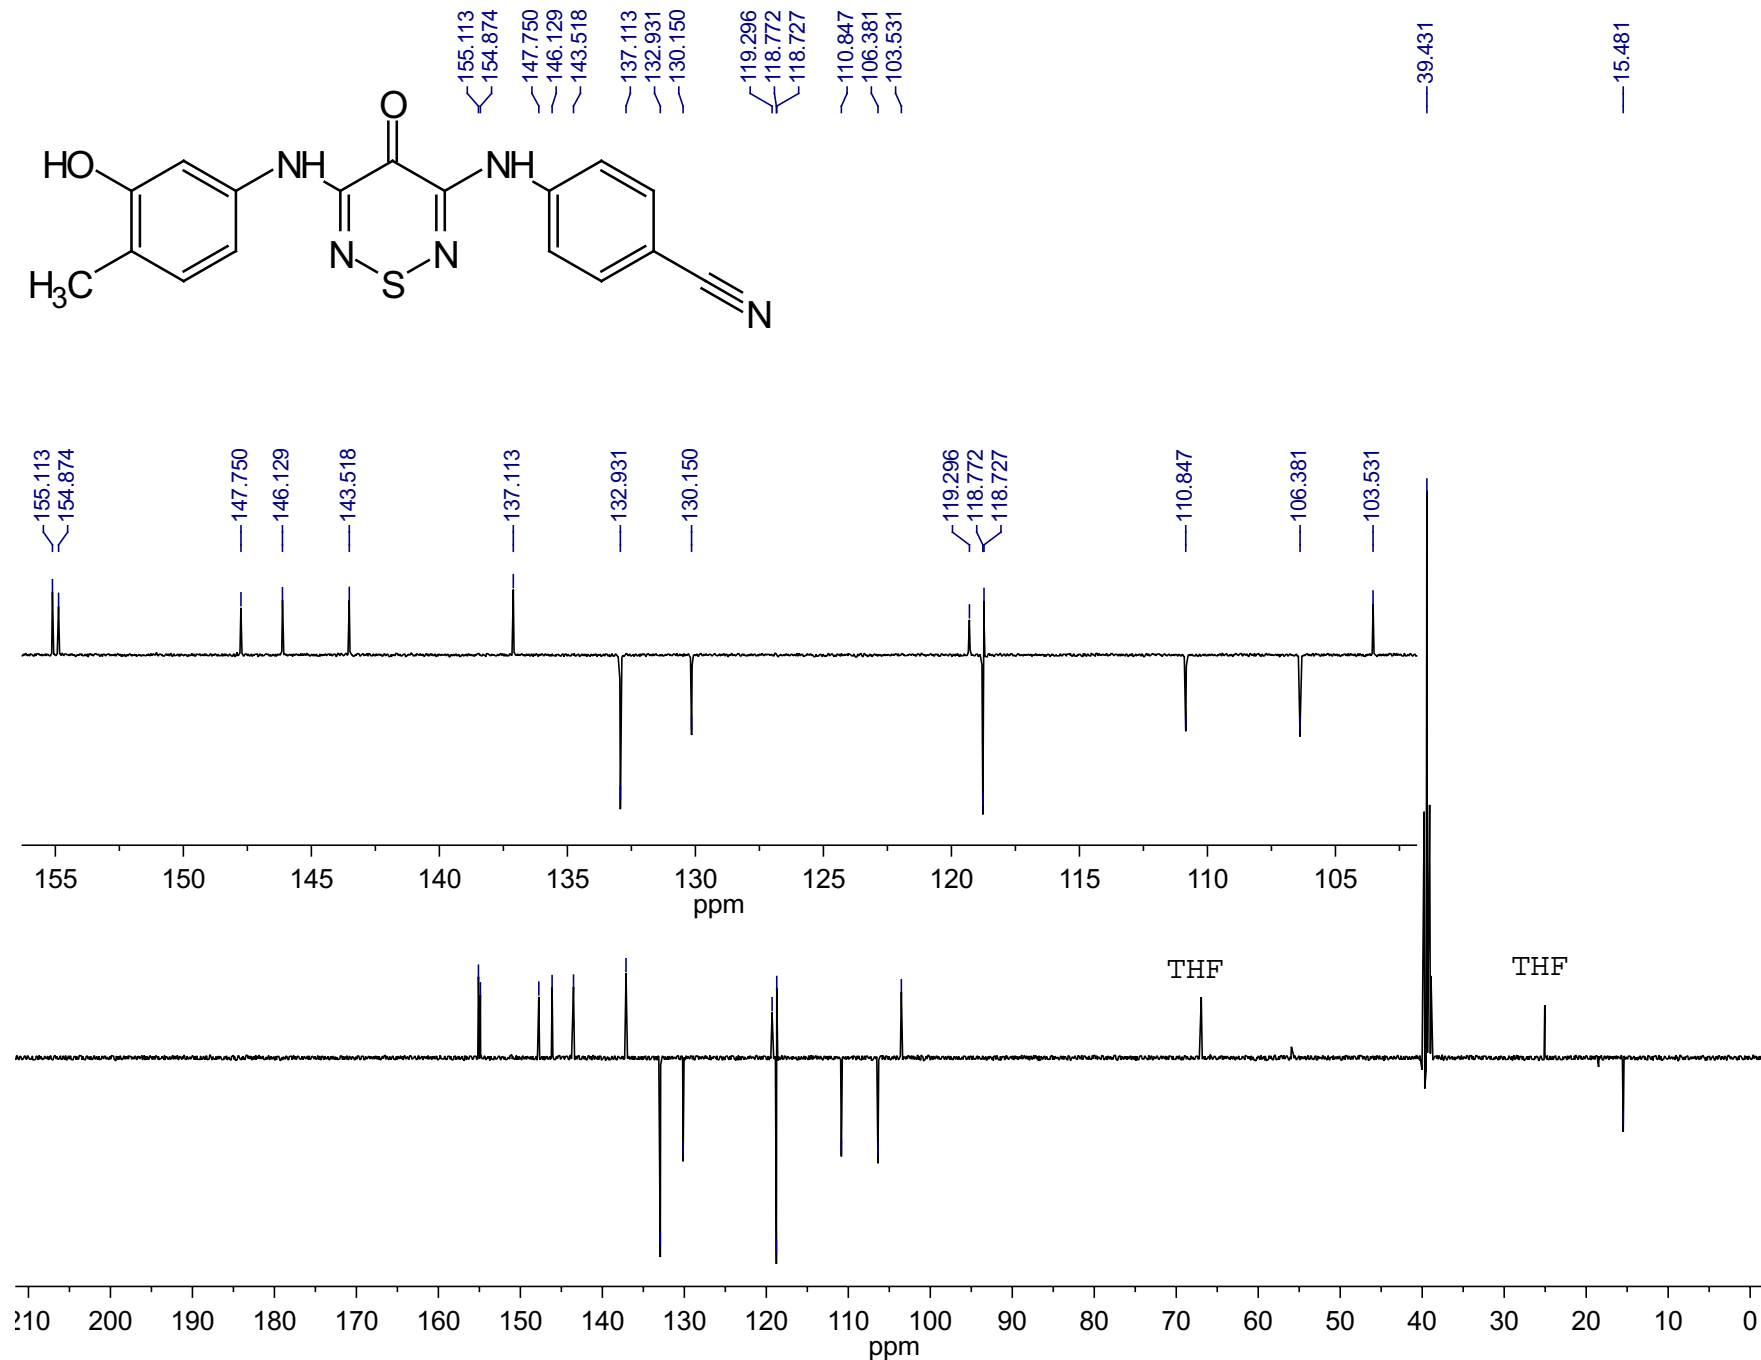

Current Data Parameters

|                             |                 |
|-----------------------------|-----------------|
| NAME                        | Kalogirou       |
| EXPNO                       | 334             |
| PROCNO                      | 1               |
| F2 - Acquisition Parameters |                 |
| Date_                       | 20170613        |
| Time                        | 16.54           |
| INSTRUM                     | spect           |
| PROBHD                      | 5 mm PABBO BB-  |
| PULPROG                     | jmod            |
| TD                          | 65536           |
| SOLVENT                     | DMSO            |
| NS                          | 2902            |
| DS                          | 4               |
| SWH                         | 29761.904 Hz    |
| FIDRES                      | 0.454131 Hz     |
| AQ                          | 1.1010048 sec   |
| RG                          | 2050            |
| DW                          | 16.800 usec     |
| DE                          | 6.50 usec       |
| TE                          | 296.9 K         |
| CNST2                       | 145.0000000     |
| CNST11                      | 1.0000000       |
| D1                          | 2.00000000 sec  |
| D20                         | 0.00689655 sec  |
| TD0                         | 1               |
| ===== CHANNEL f1 =====      |                 |
| SFO1                        | 125.7459782 MHz |
| NUC1                        | 13C             |
| P1                          | 9.00 usec       |
| P2                          | 18.00 usec      |
| PLW1                        | 140.0000000 W   |
| ===== CHANNEL f2 =====      |                 |
| SFO2                        | 500.0350280 MHz |
| NUC2                        | 1H              |
| CPDPRG2                     | waltz16         |
| PCPD2                       | 80.00 usec      |
| PLW2                        | 14.5000000 W    |
| PLW12                       | 0.32624999 W    |
| F2 - Processing parameters  |                 |
| SI                          | 32768           |
| SF                          | 125.7334733 MHz |
| WDW                         | EM              |
| SSB                         | 0               |
| LB                          | 1.00 Hz         |
| GB                          | 0               |
| PC                          | 1.40            |

<sup>1</sup>H-NMR of 4-((5-((3-hydroxy-4-methylphenyl)amino)-4-oxo-4H-1,2,6-thiadiazin-3-yl)(oxazol-4-ylmethyl)amino)benzamide (**16**)

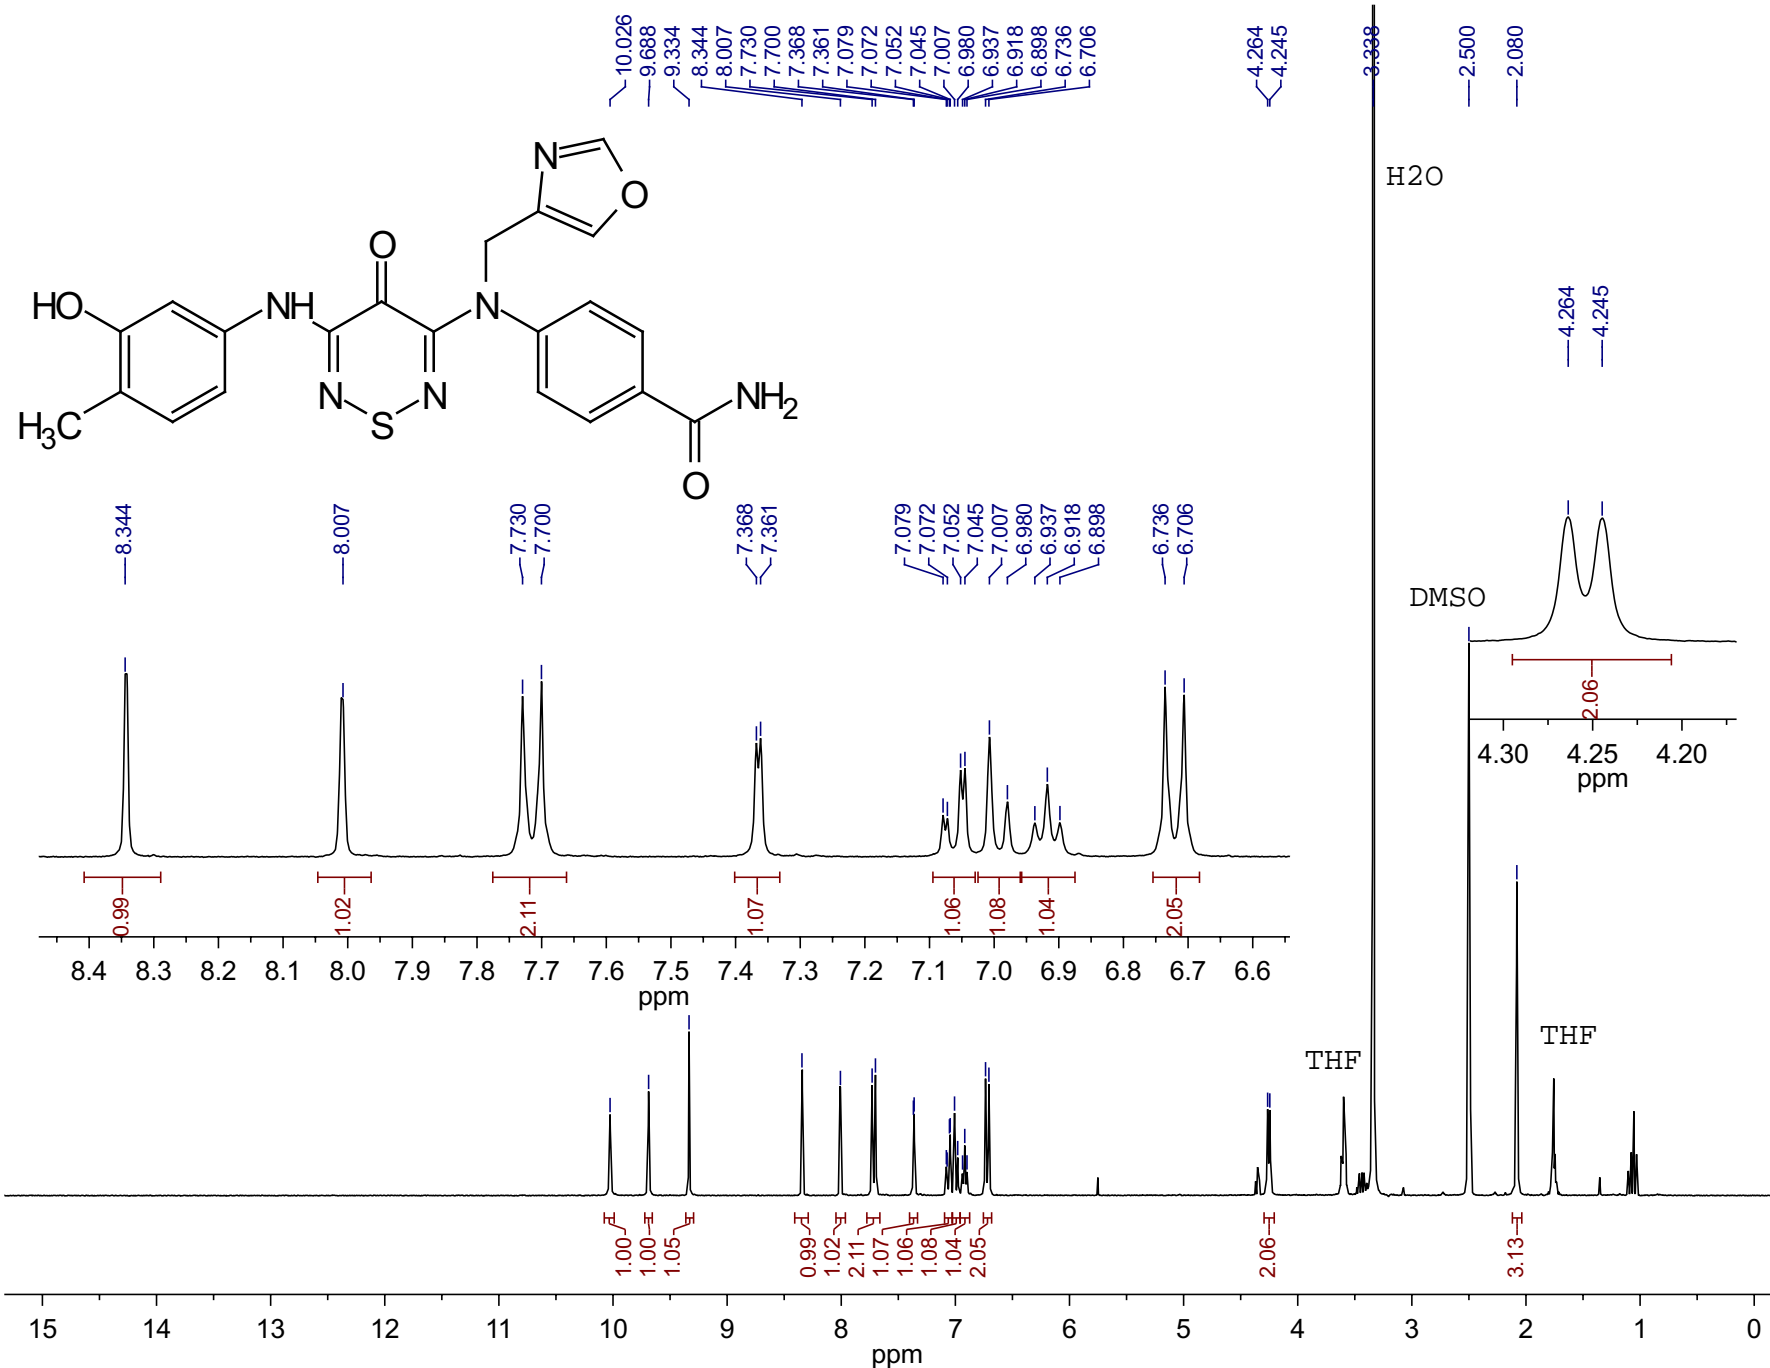

Current Data Parameters

NAME Andreas  
EXPNO 15  
PROCNO 1

F2 - Acquisition Parameters

Date\_ 20170710  
Time 18.33 h  
INSTRUM spect  
PROBHD Z104275\_0375 (  
PULPROG zg30  
TD 65536  
SOLVENT DMSO  
NS 16  
DS 2  
SWH 6009.615 Hz  
FIDRES 0.183399 Hz  
AQ 5.4525952 sec  
RG 201.81  
DW 83.200 usec  
DE 6.50 usec  
TE 298.1 K  
D1 1.00000000 sec  
TD0 1  
SFO1 300.1318533 MHz  
NUC1 1H  
P1 14.00 usec  
PLW1 7.50000000 W

F2 - Processing parameters

SI 65536  
SF 300.1300029 MHz  
WDW EM  
SSB 0  
LB 0.30 Hz  
GB 0  
PC 1.00

<sup>13</sup>C-NMR of 4-((5-((3-hydroxy-4-methylphenyl)amino)-4-oxo-4*H*-1,2,6-thiadiazin-3-yl)(oxazol-4-ylmethyl)amino)benzamide (16)

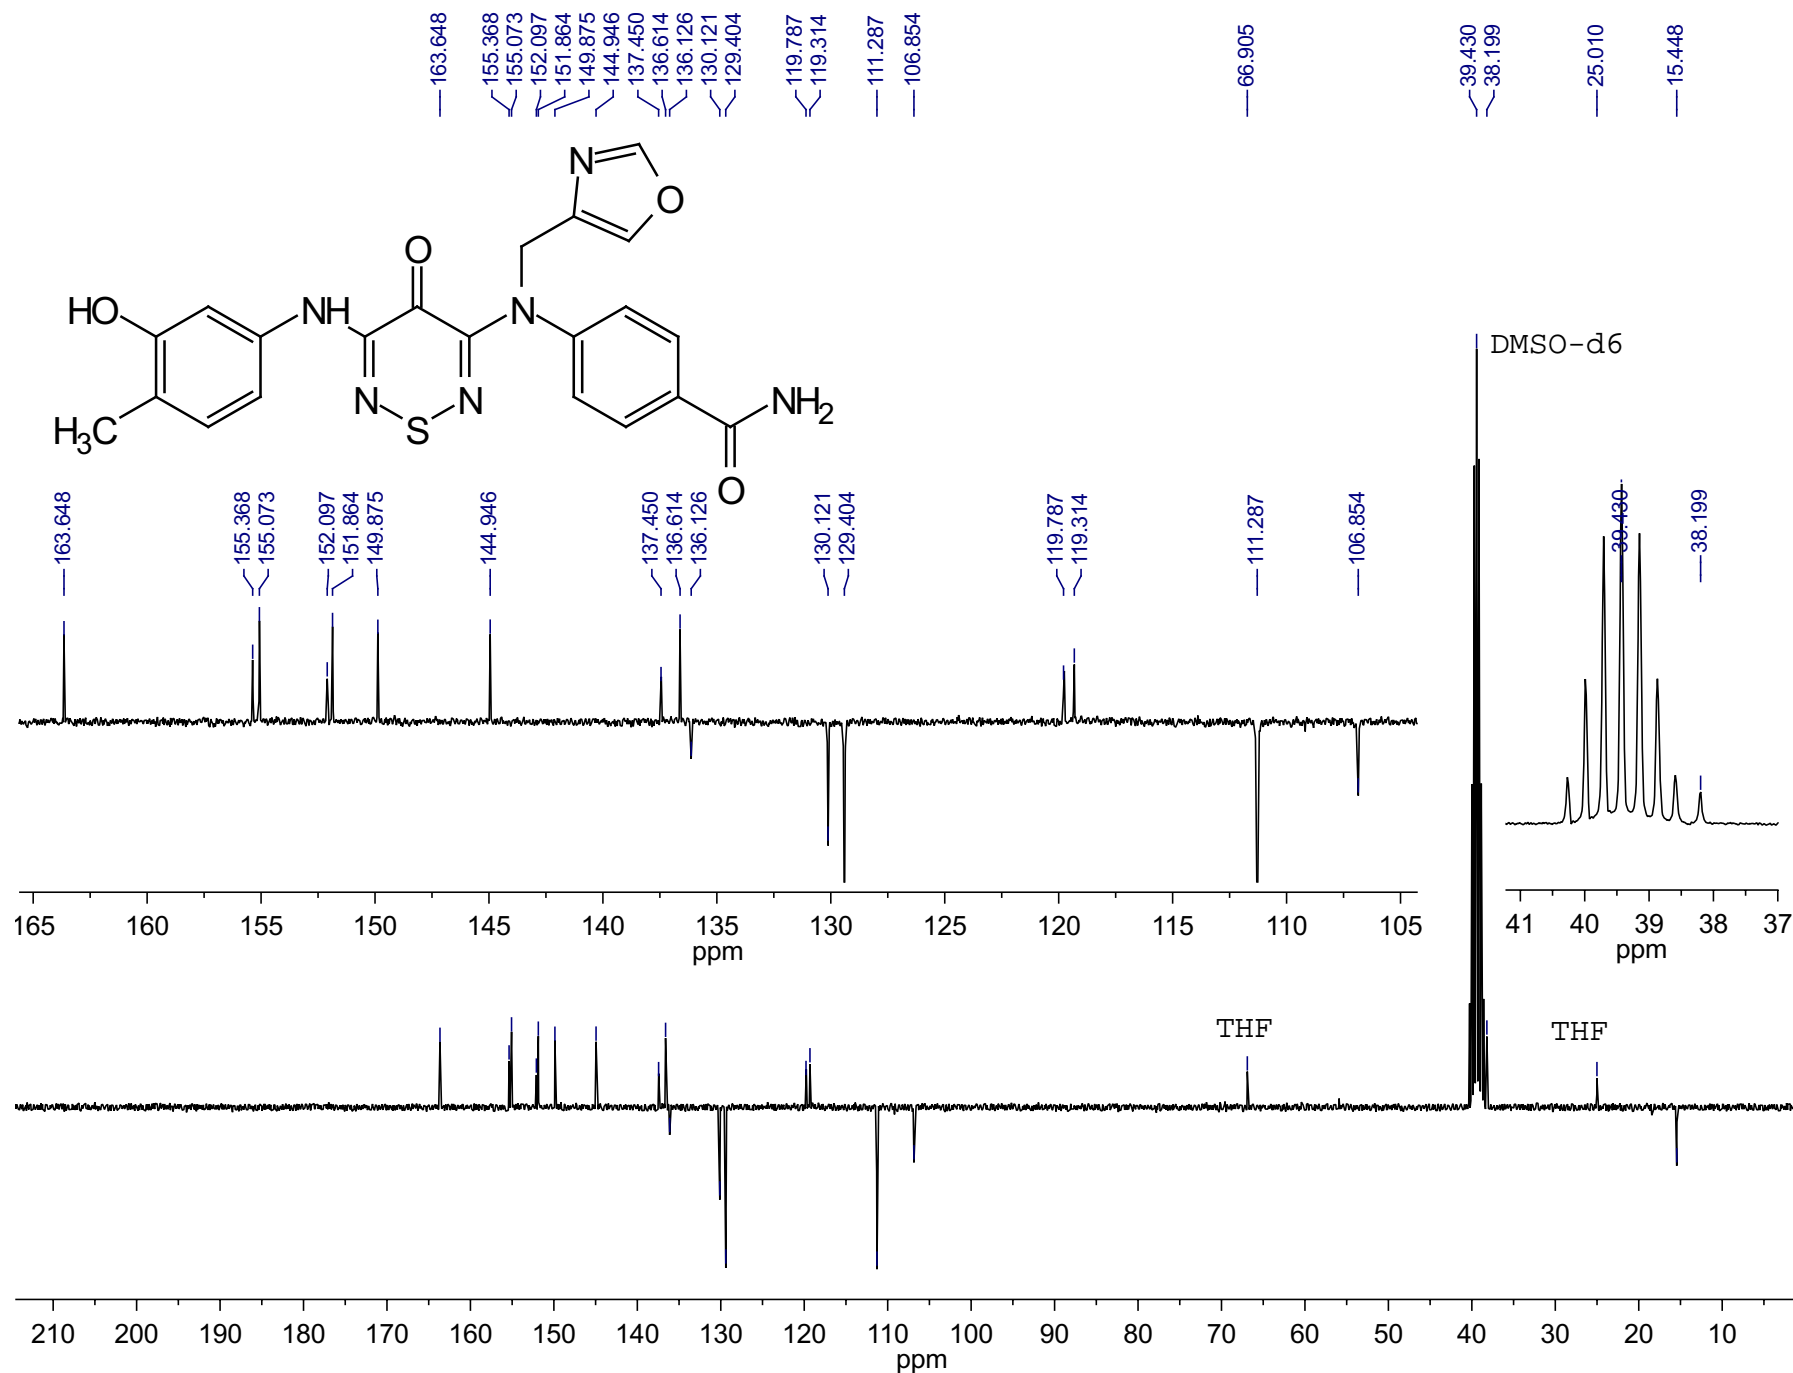

Current Data Parameters

|                  |                 |
|------------------|-----------------|
| NAME             | Andreas         |
| EXPNO            | 16              |
| PROCNO           | 1               |
| F2 - Acquisition |                 |
| Parameters       |                 |
| Date_            | 20170711        |
| Time             | 9.56 h          |
| INSTRUM          | spect           |
| PROBHD           | Z104275_0375    |
| (                |                 |
| PULPROG          | jmod            |
| TD               | 65536           |
| SOLVENT          | DMSO            |
| NS               | 14336           |
| DS               | 4               |
| SWH              | 18115.941 Hz    |
| FIDRES           | 0.552855 Hz     |
| AQ               | 1.8087935 sec   |
| RG               | 201.81          |
| DW               | 27.600 usec     |
| DE               | 6.50 usec       |
| TE               | 298.2 K         |
| CNST2            | 145.0000000     |
| CNST11           | 1.0000000       |
| D1               | 2.00000000 sec  |
| D20              | 0.00689655 sec  |
| TD0              | 1               |
| SFO1             | 75.4752953      |
| MHz              |                 |
| NUC1             | <sup>13</sup> C |
| P1               | 10.00 usec      |
| P2               | 20.00 usec      |
| PLW1             | 40.05500031 W   |
| SFO2             | 300.1312005     |
| MHz              |                 |
| NUC2             | <sup>1</sup> H  |
| CPDPRG[2]        | waltz16         |
| PCPD2            | 90.00 usec      |
| PLW2             | 7.50000000 W    |
| PLW12            | 0.18148001 W    |
| F2 - Processing  |                 |
| parameters       |                 |
| SI               | 32768           |
| SF               | 75.4677927 MHz  |
| WDW              | EM              |
| SSB              | 0               |

<sup>1</sup>H-NMR of 3-((3-hydroxy-4-methylphenyl)amino)-5-((2-(hydroxymethyl)phenyl)amino)-4H-1,2,6-thiadiazin-4-one (17)

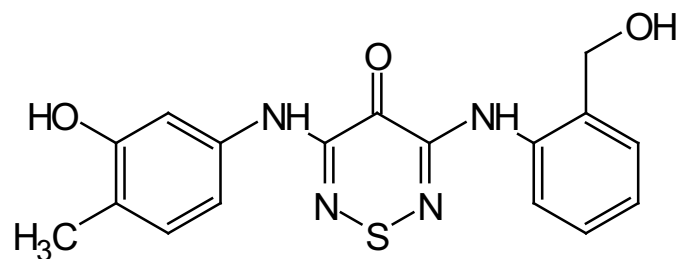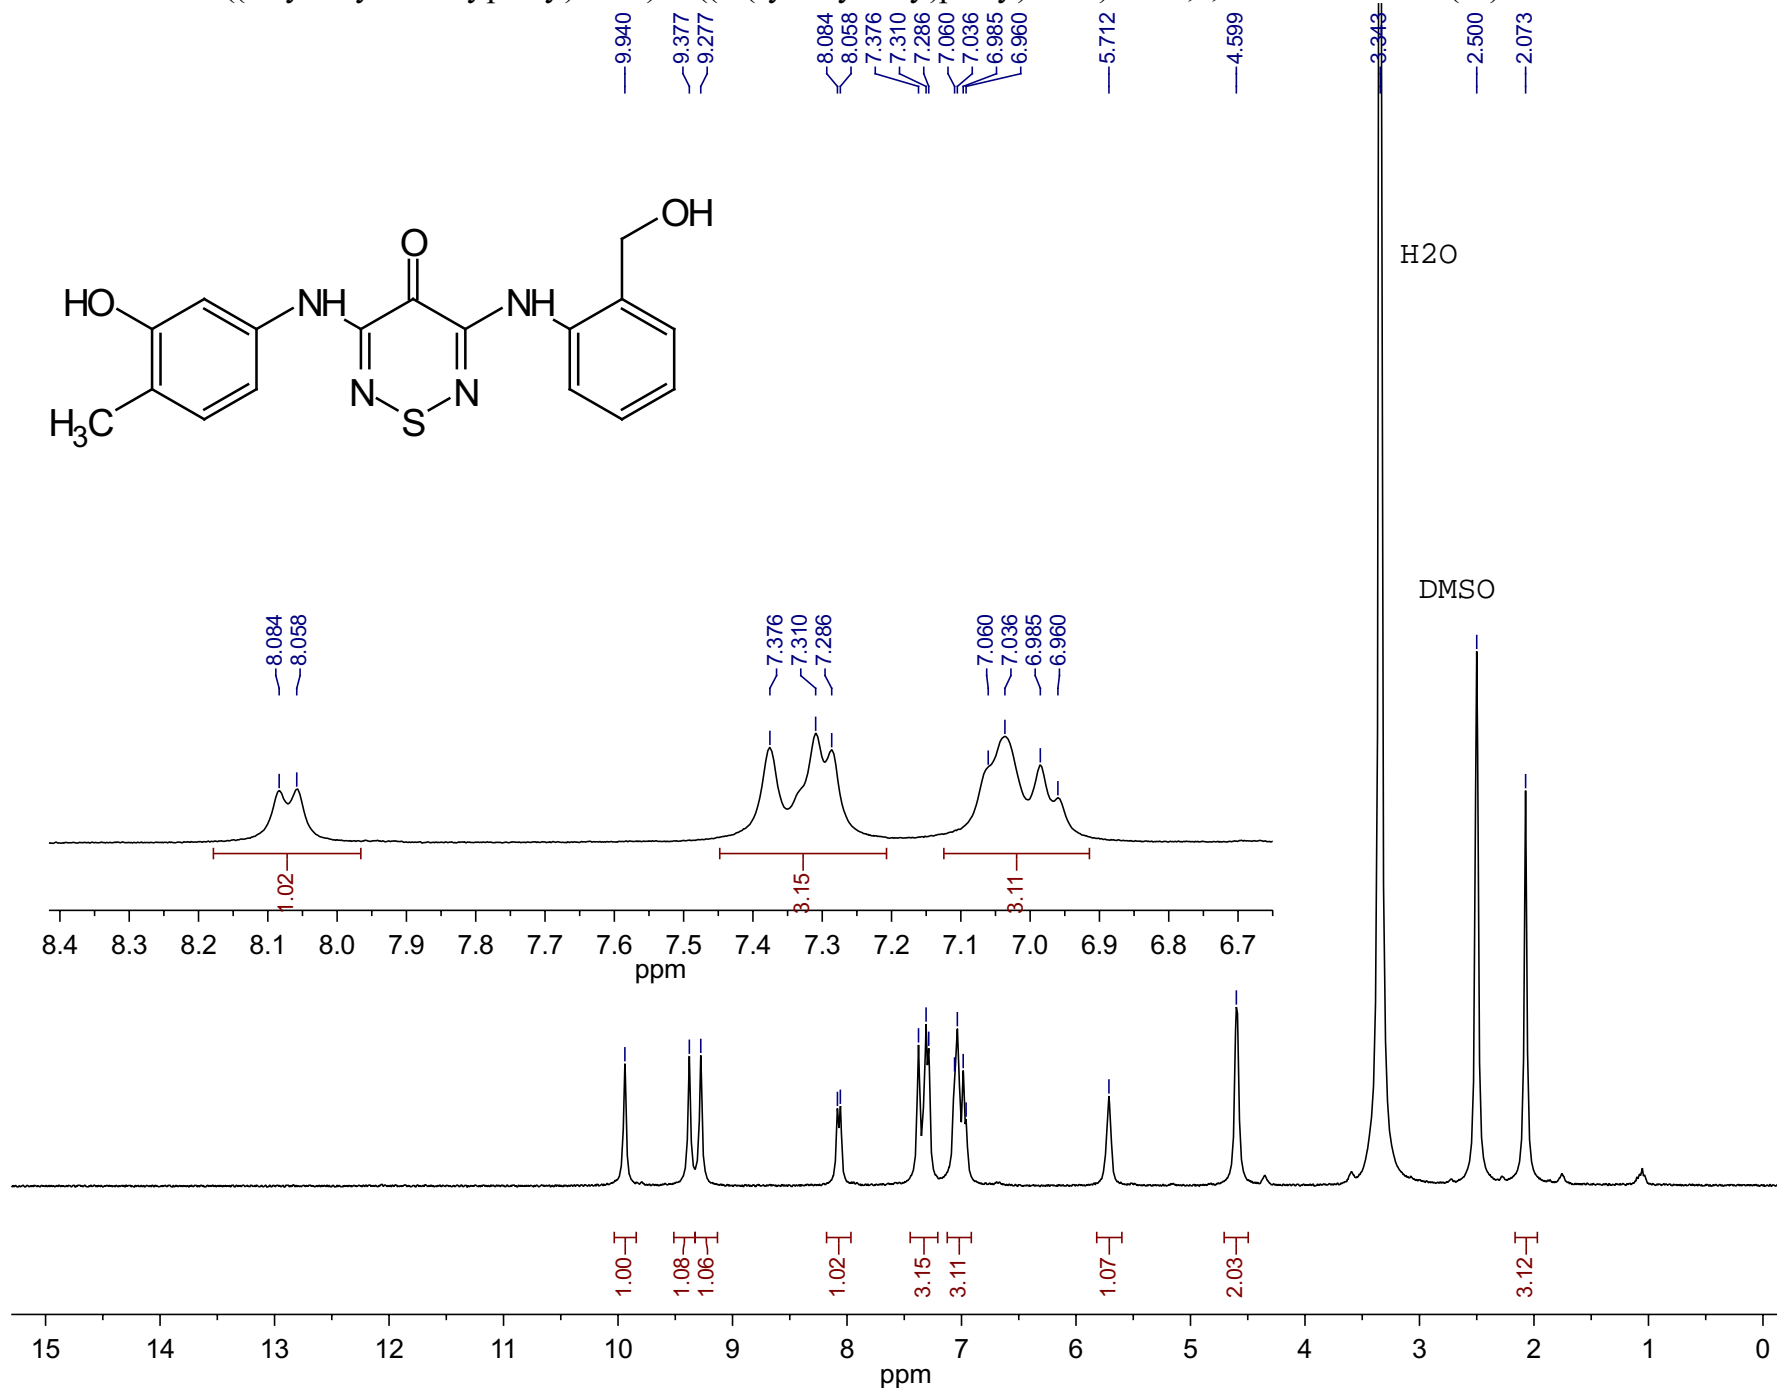

Current Data Parameters  
NAME Andreas  
EXPNO 23  
PROCNO 1

F2 - Acquisition Parameters  
Date\_ 20170807  
Time 20.42 h  
INSTRUM spect  
PROBHD Z104275\_0375 (zg30)  
PULPROG zg30  
TD 65536  
SOLVENT DMSO  
NS 16  
DS 2  
SWH 6009.615 Hz  
FIDRES 0.183399 Hz  
AQ 5.4525952 sec  
RG 201.81  
DW 83.200 usec  
DE 6.50 usec  
TE 298.2 K  
D1 1.00000000 sec  
TD0 1  
SFO1 300.1318533 MHz  
NUC1 1H  
P1 14.00 usec  
PLW1 7.50000000 W

F2 - Processing parameters  
SI 65536  
SF 300.1300036 MHz  
WDW EM  
SSB 0  
LB 0.30 Hz  
GB 0  
PC 1.00

<sup>13</sup>C-NMR of 3-((3-hydroxy-4-methylphenyl)amino)-5-((2-(hydroxymethyl)phenyl)amino)-4*H*-1,2,6-thiadiazin-4-one (**17**)

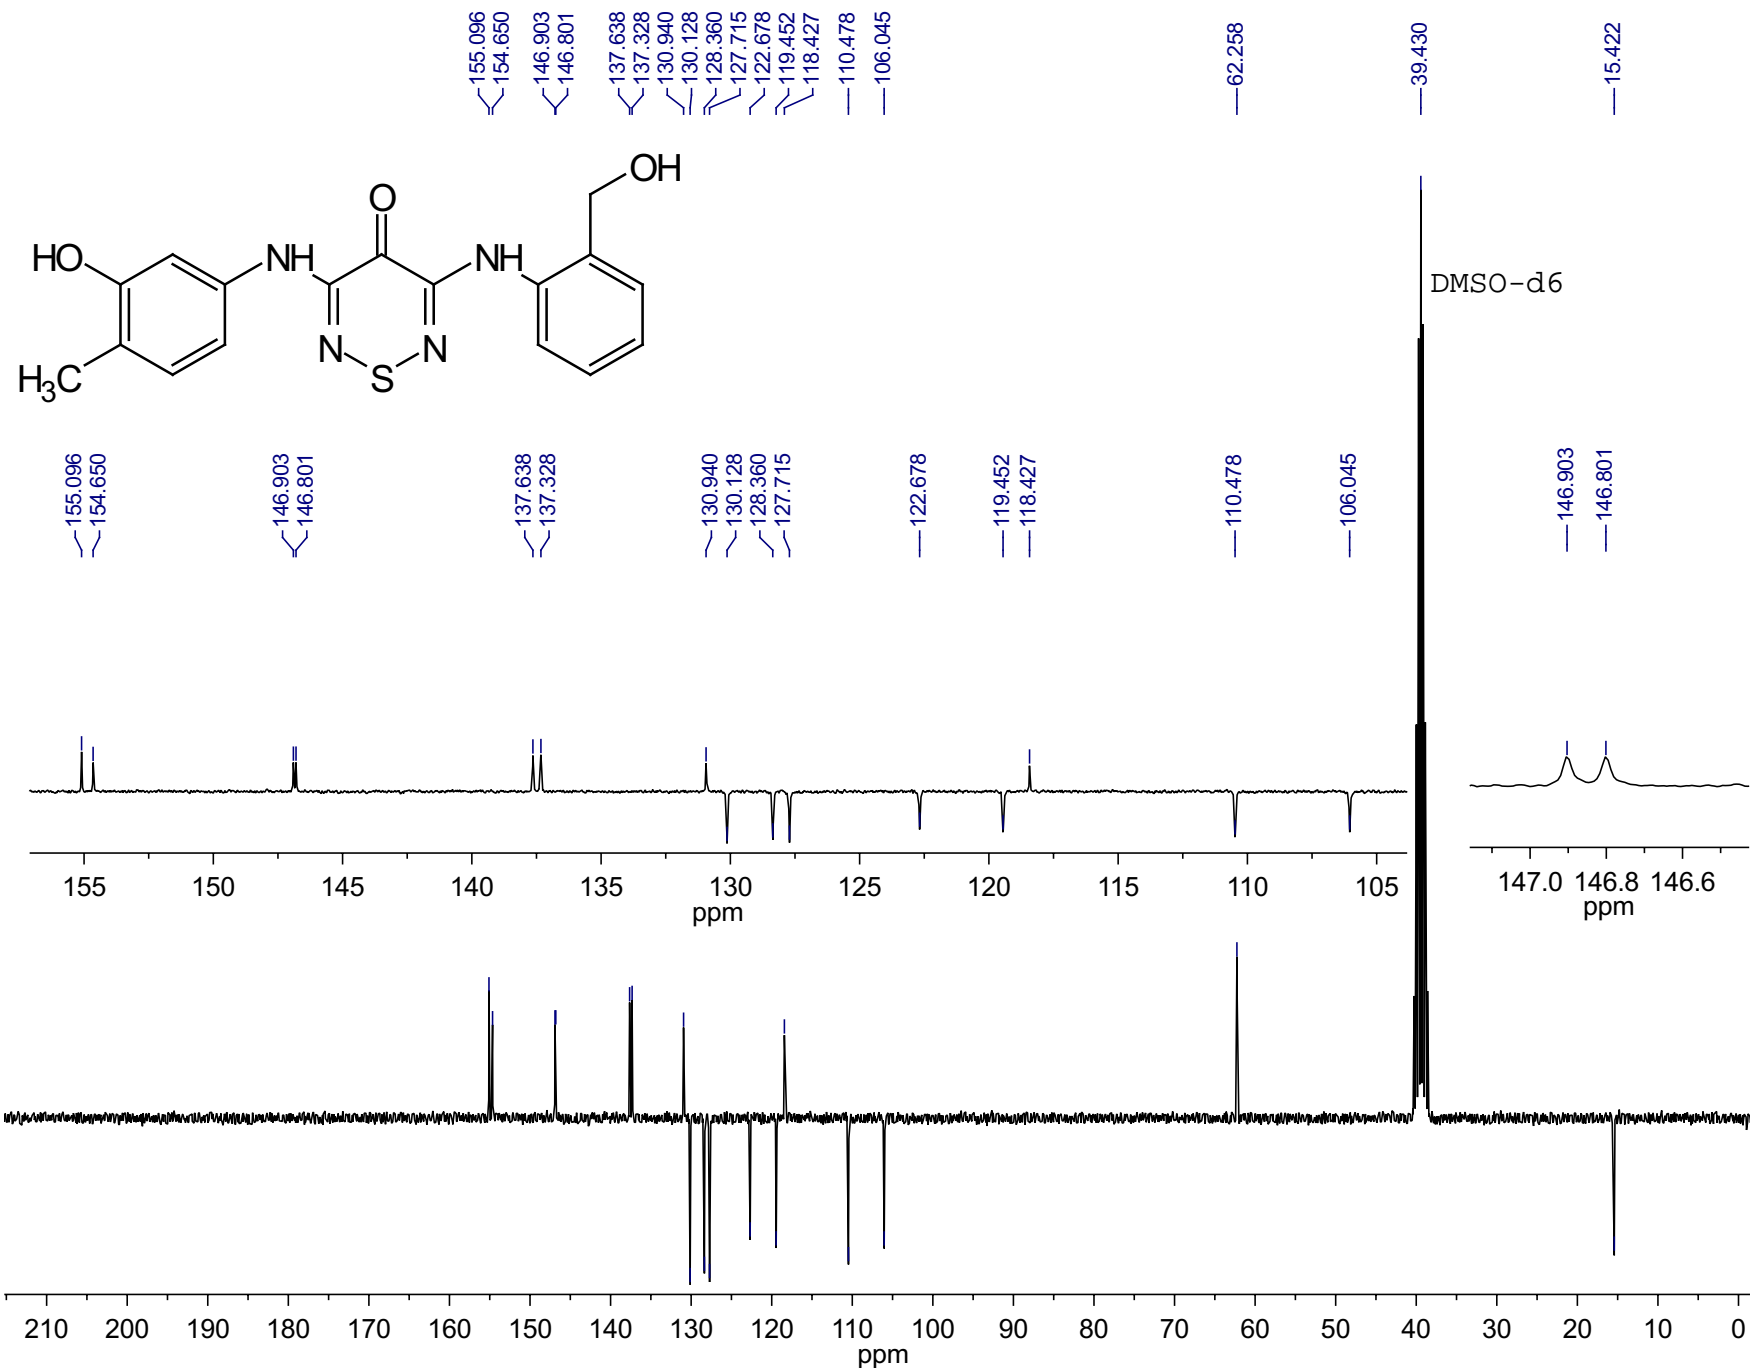

| Current Data Parameters     |                 |
|-----------------------------|-----------------|
| NAME                        | Andreas         |
| EXPNO                       | 24              |
| PROCNO                      | 1               |
| F2 - Acquisition Parameters |                 |
| Date_                       | 20170808        |
| Time                        | 9.49 h          |
| INSTRUM                     | spect           |
| PROBHD                      | Z104275_0375 (  |
| PULPROG                     | jmod            |
| TD                          | 65536           |
| SOLVENT                     | DMSO            |
| NS                          | 12228           |
| DS                          | 4               |
| SWH                         | 18115.941 Hz    |
| FIDRES                      | 0.552855 Hz     |
| AQ                          | 1.8087935 sec   |
| RG                          | 201.81          |
| DW                          | 27.600 usec     |
| DE                          | 6.50 usec       |
| TE                          | 298.4 K         |
| CNST2                       | 145.000000      |
| CNST11                      | 1.000000        |
| D1                          | 2.0000000 sec   |
| D20                         | 0.00689655 sec  |
| TD0                         | 1               |
| SFO1                        | 75.4752953 MHz  |
| NUC1                        | <sup>13</sup> C |
| P1                          | 10.00 usec      |
| P2                          | 20.00 usec      |
| PLW1                        | 40.05500031 W   |
| SFO2                        | 300.1312005 MHz |
| NUC2                        | <sup>1</sup> H  |
| CPDPRG2                     | waltz16         |
| PCPD2                       | 90.00 usec      |
| PLW2                        | 7.50000000 W    |
| PLW12                       | 0.18148001 W    |
| F2 - Processing parameters  |                 |
| SI                          | 32768           |
| SF                          | 75.4677929 MHz  |
| WDW                         | EM              |
| SSB                         | 0               |
| LB                          | 1.00 Hz         |
| GB                          | 0               |
| PC                          | 1.40            |

<sup>1</sup>H-NMR of 3-((3-hydroxy-4-methylphenyl)amino)-5-((2-(hydroxymethyl)-3-(trifluoromethyl)-phenyl)-amino)-4*H*-1,2,6-thiadiazin-4-one (**18**)

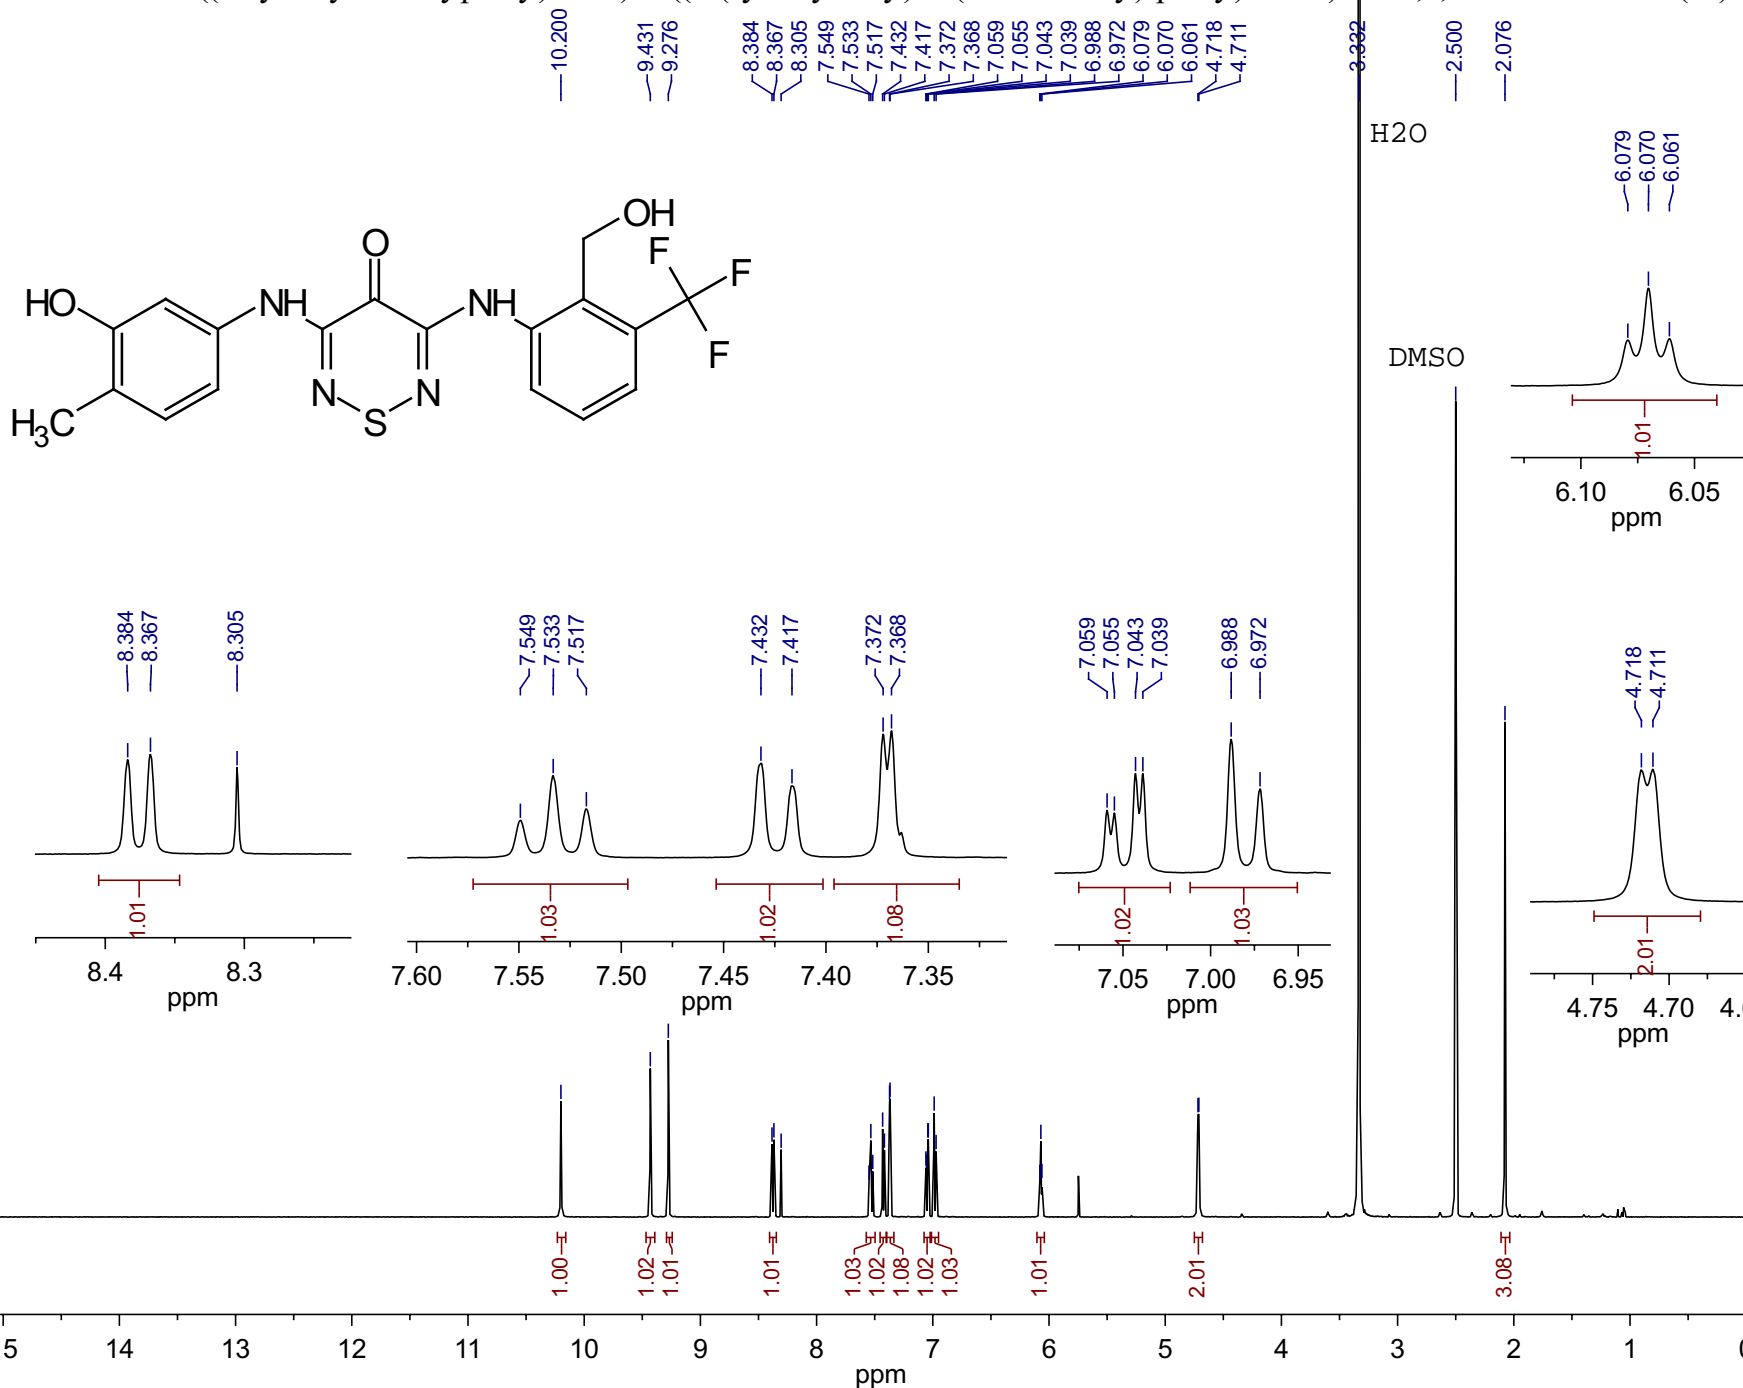

Current Data Parameters

|                             |                 |
|-----------------------------|-----------------|
| NAME                        | Kalogirou       |
| EXPNO                       | 394             |
| PROCNO                      | 1               |
| F2 - Acquisition Parameters |                 |
| Date_                       | 20170813        |
| Time                        | 5.09            |
| INSTRUM                     | spect           |
| PROBHD                      | 5 mm PABBO BB-  |
| PULPROG                     | zg30            |
| TD                          | 65536           |
| SOLVENT                     | DMSO            |
| NS                          | 16              |
| DS                          | 2               |
| SWH                         | 10000.000 Hz    |
| FIDRES                      | 0.152588 Hz     |
| AQ                          | 3.2767999 sec   |
| RG                          | 128             |
| DW                          | 50.000 usec     |
| DE                          | 6.50 usec       |
| TE                          | 300.8 K         |
| D1                          | 1.00000000 sec  |
| TD0                         | 1               |
| ===== CHANNEL f1 =====      |                 |
| SFO1                        | 500.0361158 MHz |
| NUC1                        | 1H              |
| P1                          | 12.00 usec      |
| PLW1                        | 14.50000000 W   |
| F2 - Processing parameters  |                 |
| SI                          | 65536           |
| SF                          | 500.0330324 MHz |
| WDW                         | EM              |
| SSB                         | 0               |
| LB                          | 0.30 Hz         |
| GB                          | 0               |
| PC                          | 1.00            |

<sup>13</sup>C-NMR of 3-((3-hydroxy-4-methylphenyl)amino)-5-((2-(hydroxymethyl)-3-(trifluoromethyl)-phenyl)-amino)-4*H*-1,2,6-thiadiazin-4-one (**18**)

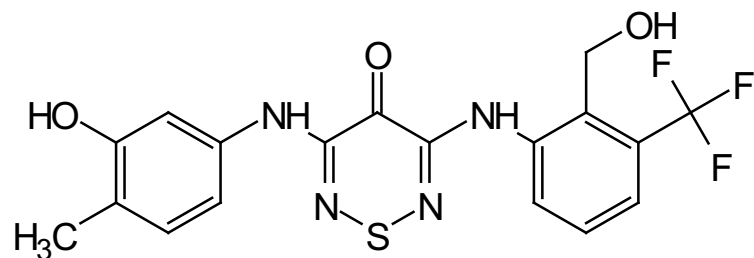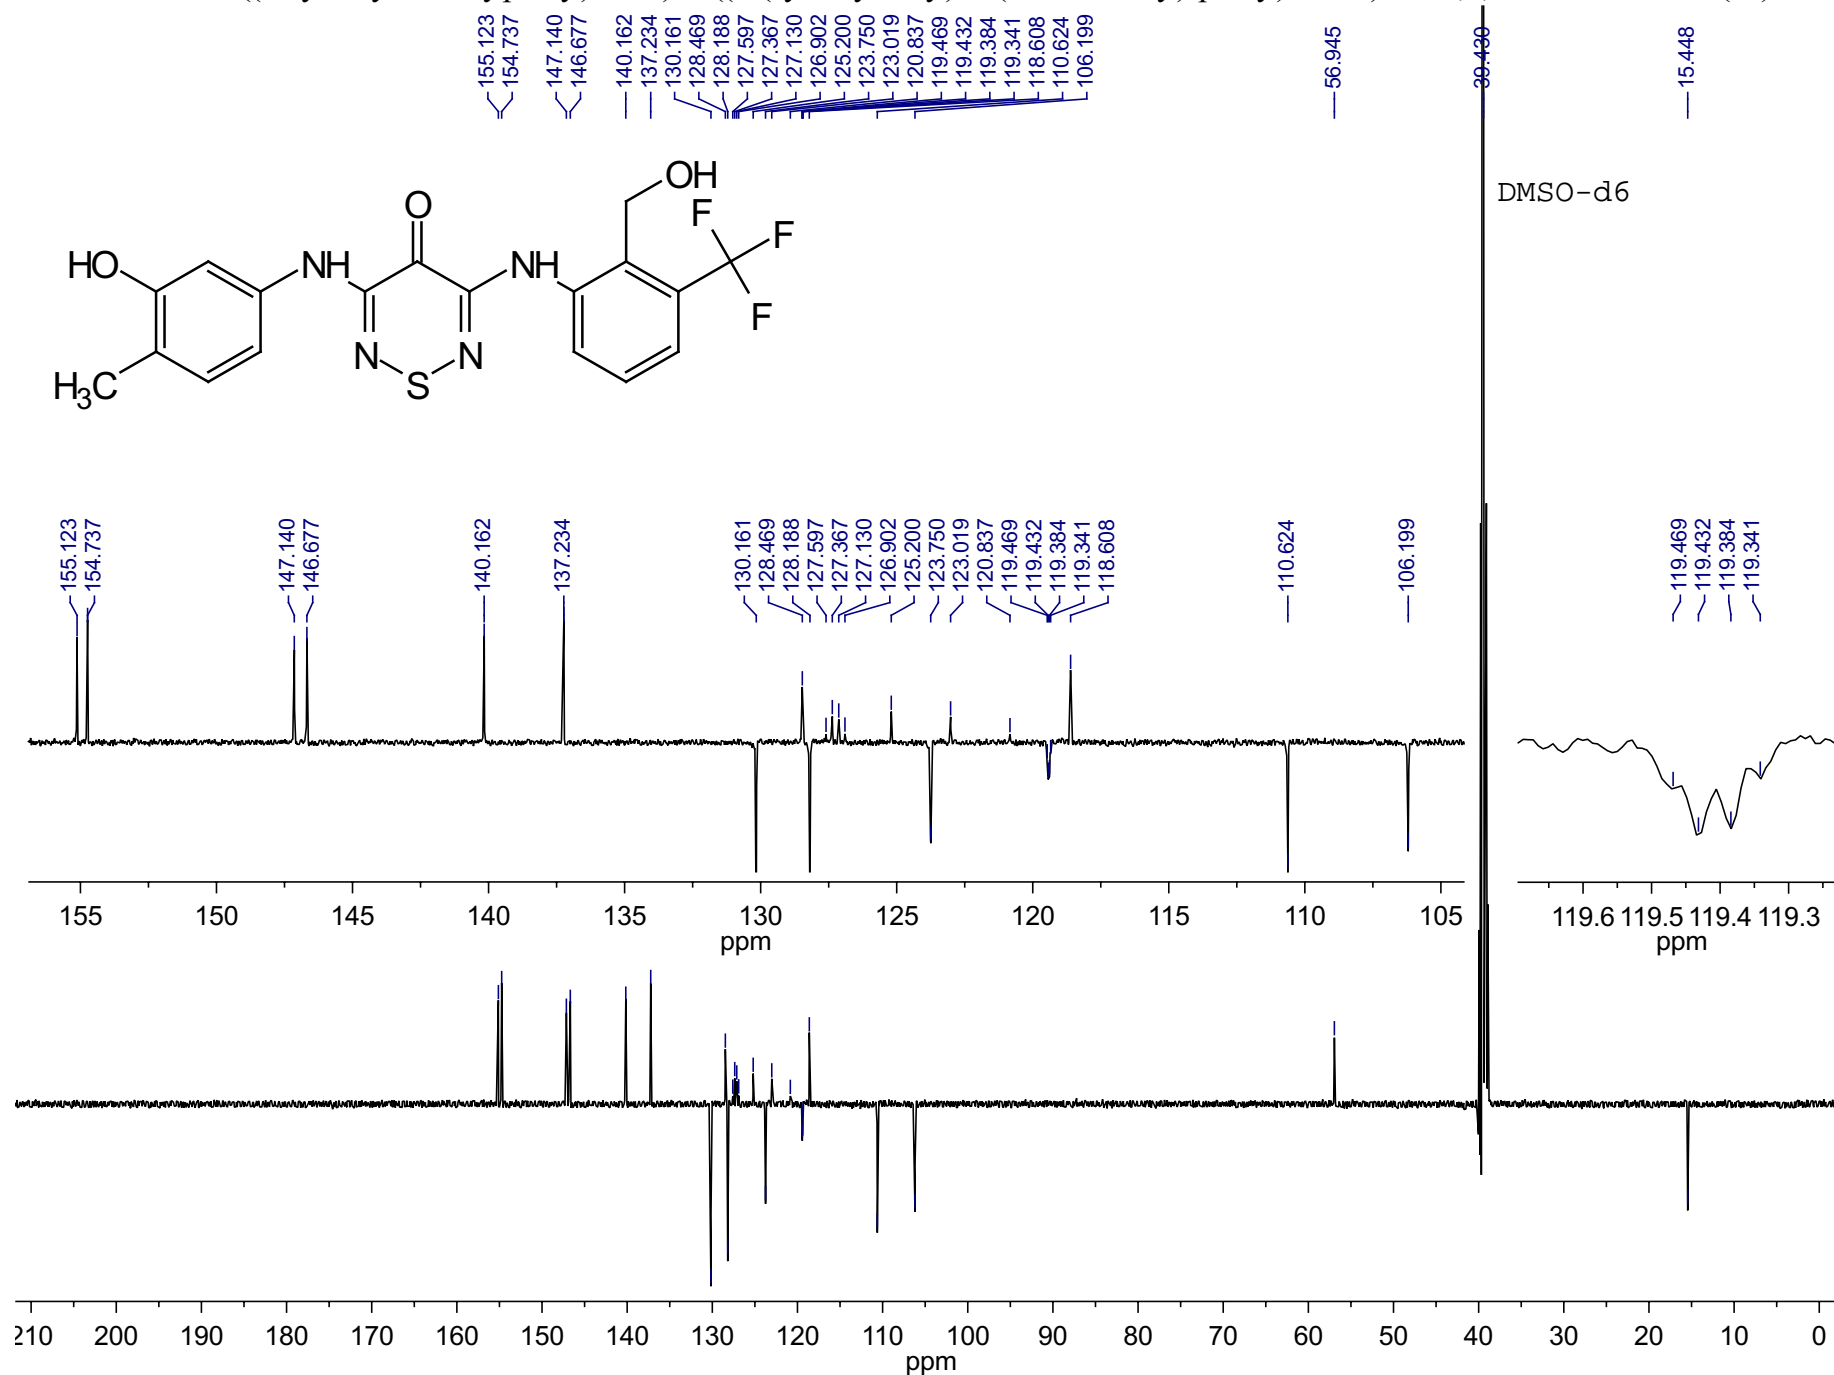

Current Data Parameters

|                             |                 |
|-----------------------------|-----------------|
| NAME                        | Kalogirou       |
| EXPNO                       | 395             |
| PROCNO                      | 1               |
| F2 - Acquisition Parameters |                 |
| Date_                       | 20170813        |
| Time                        | 15.55           |
| INSTRUM                     | spect           |
| PROBHD                      | 5 mm PABBO BB-  |
| PULPROG                     | jmod            |
| TD                          | 65536           |
| SOLVENT                     | DMSO            |
| NS                          | 12288           |
| DS                          | 4               |
| SWH                         | 29761.904 Hz    |
| FIDRES                      | 0.454131 Hz     |
| AQ                          | 1.1010048 sec   |
| RG                          | 1820            |
| DW                          | 16.800 usec     |
| DE                          | 6.50 usec       |
| TE                          | 298.4 K         |
| CNST2                       | 145.0000000     |
| CNST11                      | 1.0000000       |
| D1                          | 2.00000000 sec  |
| D20                         | 0.00689655 sec  |
| TD0                         | 1               |
| ===== CHANNEL f1 =====      |                 |
| SFO1                        | 125.7459782 MHz |
| NUC1                        | <sup>13</sup> C |
| P1                          | 9.00 usec       |
| P2                          | 18.00 usec      |
| PLW1                        | 140.00000000 W  |
| ===== CHANNEL f2 =====      |                 |
| SFO2                        | 500.0350280 MHz |
| NUC2                        | <sup>1</sup> H  |
| CPDPRG[2]                   | waltz16         |
| PCPD2                       | 80.00 usec      |
| PLW2                        | 14.50000000 W   |
| PLW12                       | 0.32624999 W    |
| F2 - Processing parameters  |                 |
| SI                          | 32768           |
| SF                          | 125.7334754 MHz |
| WDW                         | EM              |
| SSB                         | 0               |
| LB                          | 1.00 Hz         |
| GB                          | 0               |
| PC                          | 1.40            |



<sup>1</sup>H-NMR of 2-cyclopentyl-4-(5-((3-hydroxy-4-methylphenyl)amino)-4-oxo-4H-1,2,6-thiadiazin-3-yl)-benzoic acid (**19**)

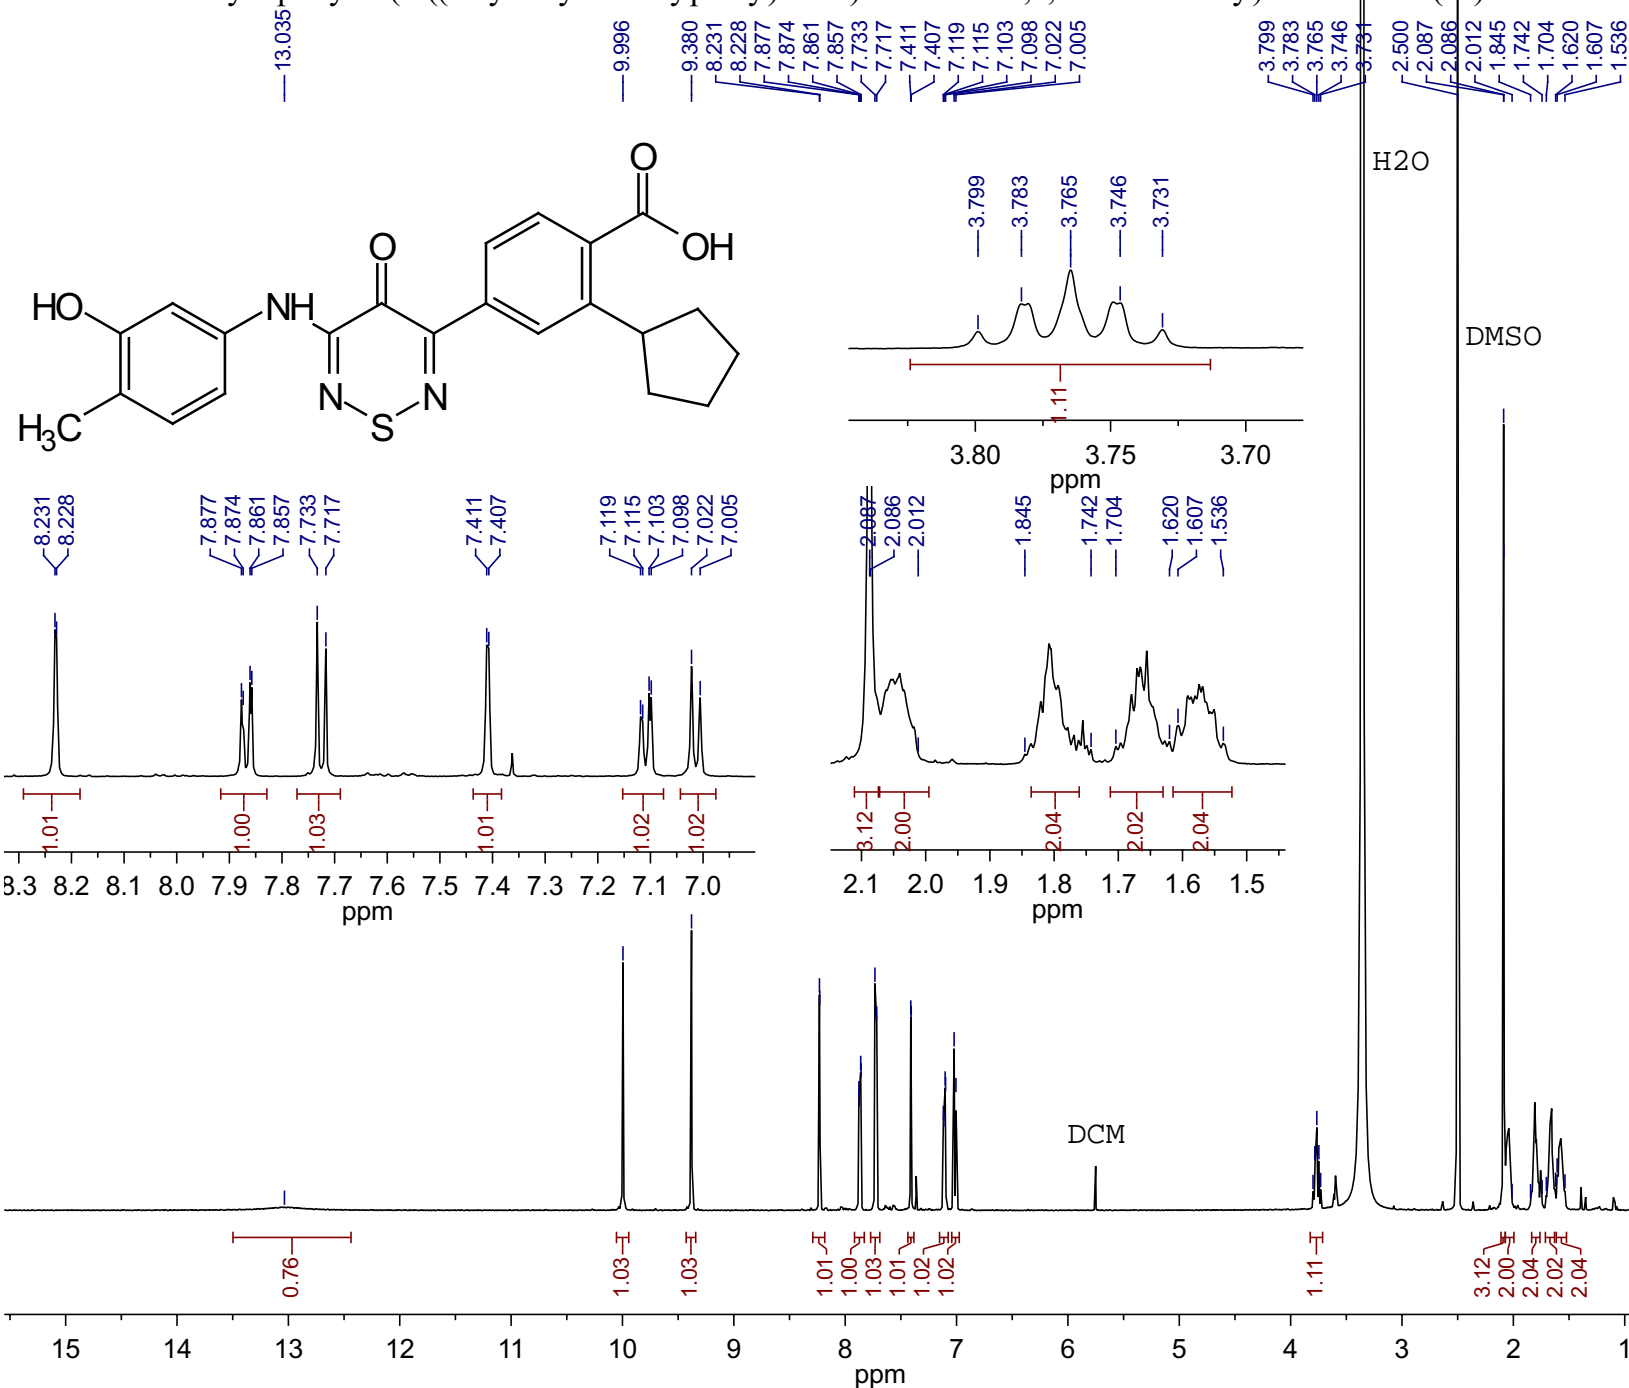

Current Data Parameters

NAME Kalogirou  
EXPNO 410  
PROCNO 1

F2 - Acquisition Parameters

Date\_ 20170918  
Time 16.26  
INSTRUM spect  
PROBHD 5 mm PABBO BB-  
PULPROG zg30  
TD 65536  
SOLVENT DMSO  
NS 16  
DS 2  
SWH 10000.000 Hz  
FIDRES 0.152588 Hz  
AQ 3.2767999 sec  
RG 101  
DW 50.000 usec  
DE 6.50 usec  
TE 296.9 K  
D1 1.0000000 sec  
TD0 1

CHANNEL f1

SFO1 500.0361158 MHz  
NUC1 1H  
P1 12.00 usec  
PLW1 14.5000000 W

F2 - Processing parameters

SI 65536  
SF 500.0330320 MHz  
WDW EM  
SSB 0  
LB 0.30 Hz  
GB 0  
PC 1.00

<sup>13</sup>C-NMR of 2-cyclopentyl-4-(5-((3-hydroxy-4-methylphenyl)amino)-4-oxo-4*H*-1,2,6-thiadiazin-3-yl)-benzoic acid (**19**)

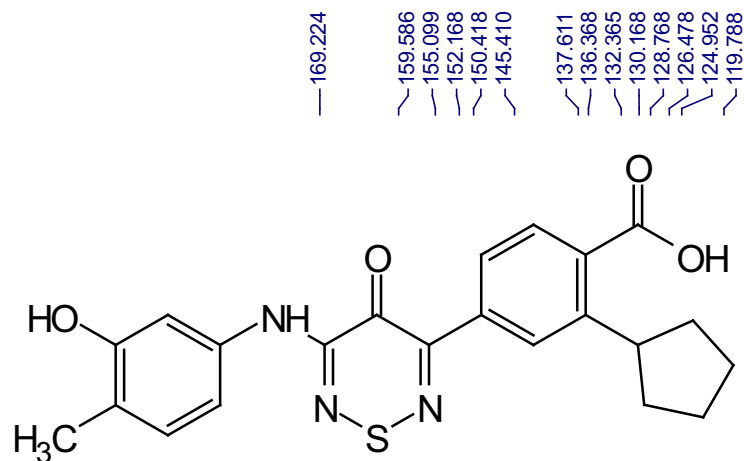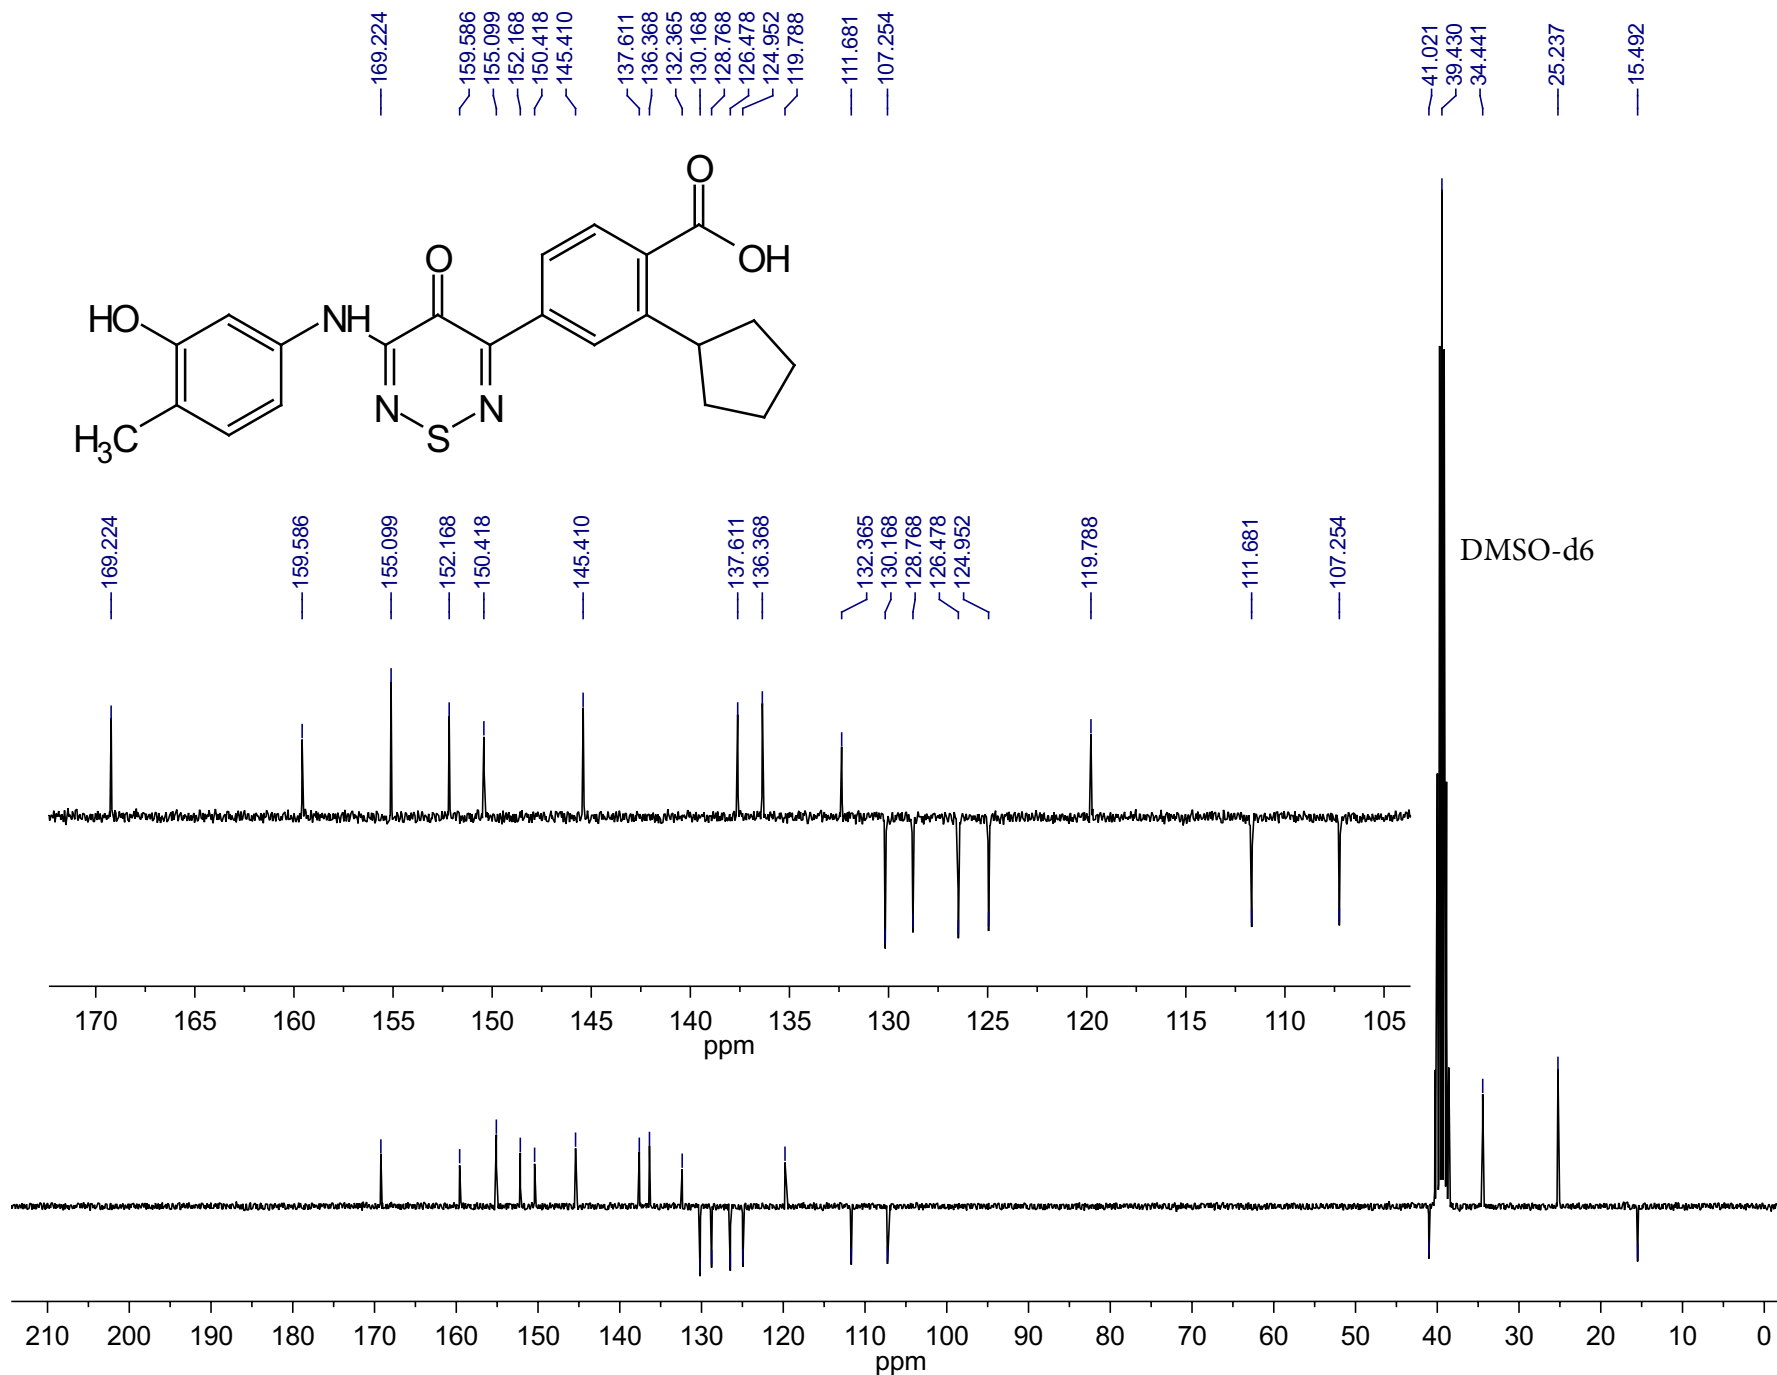

| Current Data Parameters     |                 |
|-----------------------------|-----------------|
| NAME                        | Andreas         |
| EXPNO                       | 46              |
| PROCNO                      | 1               |
| F2 - Acquisition Parameters |                 |
| Date_                       | 20170919        |
| Time                        | 9.39 h          |
| INSTRUM                     | spect           |
| PROBHD                      | Z104275_0375 (  |
| PULPROG                     | jmod            |
| TD                          | 65536           |
| SOLVENT                     | DMSO            |
| NS                          | 12288           |
| DS                          | 4               |
| SWH                         | 18115.941 Hz    |
| FIDRES                      | 0.552855 Hz     |
| AQ                          | 1.8087935 sec   |
| RG                          | 201.81          |
| DW                          | 27.600 usec     |
| DE                          | 6.50 usec       |
| TE                          | 298.6 K         |
| CNST2                       | 145.000000      |
| CNST11                      | 1.000000        |
| D1                          | 2.0000000 sec   |
| D20                         | 0.00689655 sec  |
| TD0                         | 1               |
| SFO1                        | 75.4752953 MHz  |
| NUC1                        | 13C             |
| P1                          | 10.00 usec      |
| P2                          | 20.00 usec      |
| PLW1                        | 40.05500031 W   |
| SFO2                        | 300.1312005 MHz |
| NUC2                        | 1H              |
| CPDPRG[2                    | waltz16         |
| PCPD2                       | 90.00 usec      |
| PLW2                        | 7.50000000 W    |
| PLW12                       | 0.18148001 W    |
| F2 - Processing parameters  |                 |
| SI                          | 32768           |
| SF                          | 75.4677915 MHz  |
| WDW                         | EM              |
| SSB                         | 0               |
| LB                          | 1.00 Hz         |
| GB                          | 0               |
| PC                          | 1.40            |
